# Supplementary material
Source: publisher figshare collection journal article supplement (https://gsajournals.figshare.com/ndownloader/files/21863136)
Supplement: Supplementary file 1 [file 21863136]

## Sheet: sRNA-gene pairs
Table S7a. Negatively correlated sRNA-gene pairs.
GeneID	sRNA	TF	Transcript	Target_Pos	psRNATarget Score	Correlation between sRNA and gene	miRNA_perfect_hits	Group	chr	start	end	strand	Gene Symbol	Full Name	Source	gene_description	a.th_ortholog	rice_ortholog	interaction.padj	early DRG	middle DRG	late DRG	Regulation on drought	CNV
GRMZM2G059428	TCGGCTGCTAGTTTCTACAGTGGC	ZmNAC53	GRMZM2G059428_T03	879	0	-0.472	NA	NA	1	7483453	7485519	-	nactf53	NAC-transcription factor 53	assigned by the Grassius project, (Yilmaz et al 2009)	NA	AT2G17040.1//anac036,NAC036//NAC domain containing protein 36	LOC_Os03g04070.1////no apical meristem protein, putative, expressed	0.000101818	yes	yes	no	others	noCNV
GRMZM5G860938	AATCCATATGGATTGGAGGGGATT	NA	GRMZM5G860938_T01	1943	1	-0.48	NA	NA	1	9353553	9359959	-	NA	NA	NA	Uncharacterized protein	AT2G26200.1////S-adenosyl-L-methionine-dependent methyltransferases superfamily protein	LOC_Os03g04940.1////methyltransferase, putative, expressed	0.222251	no	no	no	others	noCNV
GRMZM2G028521	AGCGCGCTGGTAAATGCGGCGGAC	NA	GRMZM2G028521_T02	1368	1	-0.607	NA	NA	1	10540341	10544903	+	citt1	citrate transporter1	0	Uncharacterized protein	AT1G02260.1////Divalent ion symporter	LOC_Os03g05390.1////Citrate transporter protein, putative, expressed	0.0531326	no	no	no	others	noCNV
GRMZM2G076062	ATCCCAACGAACGAACGATTTGAA	NA	GRMZM2G076062_T02	277	1	-0.598	NA	NA	1	12162857	12167581	-	umc2224	0	0	Uncharacterized protein	AT3G13460.1//ECT2//evolutionarily conserved C-terminal region 2	LOC_Os03g06240.1////YT521-B-like family domain containing protein, expressed	0.00109481	no	no	no	UpOnDS	noCNV
GRMZM2G000741	AATCCATATGGATTGGAGGGGATT	NA	GRMZM2G000741_T01	200	0	-0.501	NA	NA	1	15906110	15908395	+	NA	NA	NA	Uncharacterized protein	AT1G72820.1////Mitochondrial substrate carrier family protein	LOC_Os03g07890.1////mitochondrial carrier protein, putative, expressed	0.105308	no	yes	no	others	noCNV
GRMZM2G093125	GTAGACGCCACCAACATTAGCGGA	NA	GRMZM2G093125_T01	1626	0	-0.542	NA	NA	1	17854846	17856744	+	NA	NA	NA	Tyrosine/DOPA decarboxylase 2	AT2G20340.1////Pyridoxal phosphate (PLP)-dependent transferases superfamily protein	LOC_Os01g56380.1////decarboxylase, putative, expressed	0.00389339	no	no	no	DownOnDS	noCNV
GRMZM2G050514	GTTTTAGTTGTCGCTGGATAGTGC	NA	GRMZM2G050514_T01	1460	0.5	-0.56	NA	NA	1	27978351	27982007	-	gln6	glutamine synthetase3	Classical Gene from J.S	Glutamine synthetase root isozyme 1	AT5G37600.1//ATGLN1;1,ATGSR1,GLN1;1,GSR 1//glutamine synthase clone R1	LOC_Os03g12290.1////glutamine synthetase, catalytic domain containing protein, expressed	0.0372035	no	no	yes	DownOnDS	noCNV
GRMZM2G012126	ACCCATCGGGTTTCGGGTTTCGGG	NA	GRMZM2G012126_T01	1389	1	-0.685	NA	NA	1	29355738	29361914	+	NA	NA	NA	Putative uncharacterized protein	AT4G33780.1////	LOC_Os03g12930.1////expressed protein	0.575729	no	no	no	others	noCNV
GRMZM2G135877	CGCGAGGTCGGCCGACGAGGGA	NA	GRMZM2G135877_T01	568	1	-0.688	NA	NA	1	29789597	29791722	+	NA	NA	NA	Antiporter/ drug transporter/ transporter	AT1G58340.1//ZF14//MATE efflux family protein	LOC_Os03g12790.1////MATE efflux family protein, putative, expressed	5.07e-05	no	no	no	UpOnDS	noCNV
GRMZM2G110023	ATTAGTCTCTAGAAACCAAACACC	NA	GRMZM2G110023_T01	1080	1	-0.598	NA	NA	1	33830201	33835912	-	NA	NA	NA	ATP-dependent Clp protease ATP-binding subunit clpA%3B Uncharacterized protein	AT4G12060.1////Double Clp-N motif protein	LOC_Os03g14280.1////ATP-dependent Clp protease ATP-binding subunit, putative, expressed	0.000754348	no	no	yes	DownOnDS	noCNV
GRMZM2G012319	ATTTGAGGAATGAACCCATGATGC	NA	GRMZM2G012319_T02	4027	1	-0.506	NA	NA	1	38540863	38552713	+	NA	NA	NA	Uncharacterized protein	AT2G07360.1////SH3 domain-containing protein	LOC_Os03g15900.2////SH3 domain containing protein, expressed	0.113774	no	no	no	others	noCNV
GRMZM2G010196	GCGGATTTTGATACCCATGGGTAT	NA	GRMZM2G010196_T01	252	1	-0.593	NA	NA	1	54599336	54602391	+	ycf54	ycf54 homolog	Belcher et al., 2015	Uncharacterized protein	AT5G58250.1////	LOC_Os03g21370.1////expressed protein	0.0685594	no	yes	yes	others	noCNV
GRMZM5G849959	AAGAAGAACCGGCGGCGGTGCTCT	NA	GRMZM5G849959_T02	279	0	-0.524	NA	NA	1	57837766	57842932	-	NA	NA	NA	Sentrin-specific protease 2	AT4G15880.1//ATESD4,ESD4//Cysteine proteinases superfamily protein	LOC_Os03g22400.1////ulp1 protease family protein, putative, expressed	0.00204901	no	no	no	UpOnDS	noCNV
GRMZM2G308666	TGGCTCTCGGCAAAGACTGACGGC	NA	GRMZM2G308666_T01	1774	0	-0.466	NA	NA	1	60702279	60704479	+	NA	NA	NA	Uncharacterized protein	AT3G48310.1//CYP71A22//cytochrome P450, family 71, subfamily A, polypeptide 22	LOC_Os08g01510.1////cytochrome P450, putative, expressed	0.653799	no	no	no	others	noCNV
GRMZM2G108416	ACTAAAACAAACATGATTTAACGT	NA	GRMZM2G108416_T01	2137	0.5	-0.477	NA	NA	1	62434950	62454927	-	NA	NA	NA	Aminotransferase%2C class IV family protein	AT5G27410.2////D-aminoacid aminotransferase-like PLP-dependent enzymes superfamily protein	LOC_Os03g24460.2////aminotransferase domain containing protein, putative, expressed	0.0176063	no	no	no	UpOnDS	noCNV
GRMZM2G023325	AATAACTTCCTTATTTTCGTGGGC	NA	GRMZM2G023325_T01	848	0	-0.485	NA	NA	1	66506457	66507471	+	bx12	benzoxazinone synthesis12	from Meihls et al 2013	NA	AT4G35160.1////O-methyltransferase family protein	LOC_Os12g25450.1////O-methyltransferase, putative, expressed	2.56e-05	no	no	yes	others	noCNV
GRMZM2G351259	GTGGATTGAGTGGGATTGGATGGG	NA	GRMZM2G351259_T01	1838	1	-0.557	NA	NA	1	72891989	72893894	+	NA	NA	NA	Uncharacterized protein	AT1G13110.1//CYP71B7//cytochrome P450, family 71 subfamily B, polypeptide 7	LOC_Os04g10160.1////cytochrome P450, putative, expressed	0.164561	no	no	yes	others	noCNV
GRMZM2G068826	AGCCTTTGGACTACACTCGGTAGC	NA	GRMZM2G068826_T01	777	0.5	-0.548	NA	NA	1	76022799	76023952	-	NA	NA	NA	Putative uncharacterized protein	NA	LOC_Os07g03020.1////expressed protein	0.000340251	no	no	yes	others	noCNV
GRMZM2G040441	ACTAAATGGGACTAAAATGGAGGG	NA	GRMZM2G040441_T03	1372	0	-0.472	NA	NA	1	84547891	84553701	-	mlo2	barley mlo defense gene homolog2	from: Entrez Gene 542061	MLO-like protein	AT1G42560.1//ATMLO9,MLO9//Seven transmembrane MLO family protein	LOC_Os10g39520.1////MLO domain containing protein, putative, expressed	0.235633	no	no	no	others	noCNV
GRMZM2G040441	AGTCCTACCGTTTGGCAATTTAGA	NA	GRMZM2G040441_T03	1397	0.5	-0.448	NA	NA	1	84547891	84553701	-	mlo2	barley mlo defense gene homolog2	from: Entrez Gene 542061	MLO-like protein	AT1G42560.1//ATMLO9,MLO9//Seven transmembrane MLO family protein	LOC_Os10g39520.1////MLO domain containing protein, putative, expressed	0.235633	no	no	no	others	noCNV
GRMZM5G873519	GGTACGGAGGGACGGAGGAGGCT	NA	GRMZM5G873519_T01	261	1	-0.591	NA	NA	1	105237264	105239945	-	NA	NA	NA	Uncharacterized protein	AT1G32080.1////membrane protein, putative	LOC_Os10g42780.1////lrgB-like family protein, expressed	0.0194371	no	no	yes	DownOnDS	noCNV
GRMZM5G883813	CTAACCTAGTGTTACTCAGGCA	NA	GRMZM5G883813_T01	1	0	-0.468	NA	NA	1	128710820	128712394	-	NA	NA	NA	Uncharacterized protein	NA	NA	0.424434	no	no	no	others	noCNV
GRMZM5G883813	ATAATTGATCGCGTGATGCGAA	NA	GRMZM5G883813_T01	164	1	-0.577	NA	NA	1	128710820	128712394	-	NA	NA	NA	Uncharacterized protein	NA	NA	0.424434	no	no	no	others	noCNV
GRMZM2G159587	ATAGCATTTGAGAACAAGTCCCCA	NA	GRMZM2G159587_T01	1355	1	-0.518	NA	NA	1	140725401	140729947	-	NA	NA	NA	Glyoxylate reductase	AT1G79870.1////D-isomer specific 2-hydroxyacid dehydrogenase family protein	LOC_Os01g12830.1////erythronate-4-phosphate dehydrogenase domain containing protein, expressed	0.259337	no	no	no	others	noCNV
GRMZM2G455784	GAGGTGGGGGTCGAGCAGAGGA	NA	GRMZM2G455784_T01	1528	1	-0.487	NA	NA	1	142790094	142792762	-	NA	NA	NA	Uncharacterized protein	NA	NA	0.0512289	no	no	no	others	noCNV
GRMZM2G424181	GATTGGATGGGTTTGAATCCCAAA	NA	GRMZM2G424181_T01	3836	1	-0.487	NA	NA	1	149555585	149563220	+	NA	NA	NA	NA	AT4G24680.1//MOS1//modifier of snc1	LOC_Os12g37860.1////expressed protein	2.23e-05	no	no	yes	UpOnDS	noCNV
GRMZM2G074393	ACTGATGGTTGCAATGTAGTGGTG	NA	GRMZM2G074393_T01	882	1	-0.465	NA	NA	1	157068826	157069951	-	NA	NA	NA	Uncharacterized protein	AT5G08050.1////Protein of unknown function (DUF1118)	LOC_Os12g38640.1////expressed protein	0.285203	no	yes	yes	others	noCNV
GRMZM2G088613	GGCGACCGCTGCGGCGGTAAGGGG	NA	GRMZM2G088613_T01	1537	0	-0.476	NA	others	1	166076724	166081866	+	NA	NA	NA	NA	AT3G18950.1////Transducin/WD40 repeat-like superfamily protein	LOC_Os12g40260.1////WD-40 repeat family protein, putative, expressed	0.22507	no	no	no	others	noCNV
GRMZM2G071987	GATTTGGTCATGATTTATATTCGG	NA	GRMZM2G071987_T01	1191	0.5	-0.464	NA	NA	1	172207302	172209234	-	NA	NA	NA	Cell-cell signaling protein csgA-like	AT4G20760.1////NAD(P)-binding Rossmann-fold superfamily protein	LOC_Os12g41590.1////oxidoreductase, short chain dehydrogenase/reductase family domain containing protein, expressed	0.0195734	no	no	no	DownOnDS	noCNV
GRMZM2G099542	AGACGTTAGATCTAAAATGAGTGG	NA	GRMZM2G099542_T01	34	1	-0.534	NA	NA	1	174400918	174407031	-	NA	NA	NA	NA	AT5G38640.1////NagB/RpiA/CoA transferase-like superfamily protein	LOC_Os12g42260.1////initiation factor 2 subunit family domain containing protein, expressed	0.432393	no	no	no	others	noCNV
GRMZM2G423476	GCTCCTGCTAAAGTTTAGCCCGGG	NA	GRMZM2G423476_T01	41	1	-0.452	NA	NA	1	180715229	180718717	+	asg11	0	0	NA	AT5G39990.1////Core-2/I-branching beta-1,6-N-acetylglucosaminyltransferase family protein	LOC_Os12g44240.1////N-acetylglucosaminyltransferase, putative, expressed	0.950399	no	no	no	others	noCNV
GRMZM2G151236	ATTAGAGAAGCAATCCGGTTAGGA	NA	GRMZM2G151236_T02	1035	1	-0.699	NA	NA	1	180854373	180864776	-	NA	NA	NA	Uncharacterized protein	AT3G25840.1////Protein kinase superfamily protein	LOC_Os12g44330.1////serine/threonine-protein kinase PRP4, putative, expressed	2.54e-05	no	no	yes	UpOnDS	noCNV
GRMZM2G151236	ACAAAGTTTATATAAATTAGAGAA	NA	GRMZM2G151236_T03	3330	1	-0.669	NA	NA	1	180854373	180864776	-	NA	NA	NA	Uncharacterized protein	AT3G25840.1////Protein kinase superfamily protein	LOC_Os12g44330.1////serine/threonine-protein kinase PRP4, putative, expressed	2.54e-05	no	no	yes	UpOnDS	noCNV
GRMZM2G151236	ATTGCACCCGGAATCGTTCCAGCT	NA	GRMZM2G151236_T02	1076	0.5	-0.769	NA	NA	1	180854373	180864776	-	NA	NA	NA	Uncharacterized protein	AT3G25840.1////Protein kinase superfamily protein	LOC_Os12g44330.1////serine/threonine-protein kinase PRP4, putative, expressed	2.54e-05	no	no	yes	UpOnDS	noCNV
GRMZM2G080912	AGAGTGTTCTGTAAAGGACAGAGA	NA	GRMZM2G080912_T01	1939	0	-0.727	NA	NA	1	184041593	184046827	-	NA	NA	NA	Uncharacterized protein	AT2G44200.1////CBF1-interacting co-repressor CIR, N-terminal;Pre-mRNA splicing factor	LOC_Os08g39090.1////coiled-coil domain containing 49, putative, expressed	1.32e-10	no	no	yes	UpOnDS	noCNV
GRMZM2G430371	AGCAATGCATCAAAGGGTTCCA	NA	GRMZM2G430371_T01	1206	1	-0.551	NA	NA	1	184410045	184411988	-	NA	NA	NA	NA	NA	NA	NA	NA	NA	NA	NA	NA
GRMZM2G430371	ATCCACAAGATCTAAGCAAGGC	NA	GRMZM2G430371_T01	1298	1	-0.455	NA	NA	1	184410045	184411988	-	NA	NA	NA	NA	NA	NA	NA	NA	NA	NA	NA	NA
GRMZM2G430371	GTATGGATATCAAGGAAAGCAA	NA	GRMZM2G430371_T01	1223	1	-0.451	NA	NA	1	184410045	184411988	-	NA	NA	NA	NA	NA	NA	NA	NA	NA	NA	NA	NA
GRMZM2G160917	TTGACAGAAGAGAGCGAGCAC	ZmSBP8	GRMZM2G160917_T01	1408	1	-0.772	zma-MIR156k	Gene miRNA	1	188215376	188219483	-	ub2	unbranched2	assigned by the Grassius project, (Yilmaz et al 2009), also from AJ011618 and Chuck et al, 2014	SBP-domain protein 5	AT2G42200.1//SPL9//squamosa promoter binding protein-like 9	LOC_Os08g39890.1////OsSPL14 - SBP-box gene family member, expressed	0.118658	no	no	no	others	noCNV
GRMZM2G160917	TTGACAGAAGAGAGTGAGCAC	ZmSBP8	GRMZM2G160917_T03	1309	1	-0.838	zma-MIR156b,zma-MIR156d	Gene miRNA	1	188215376	188219483	-	ub2	unbranched2	assigned by the Grassius project, (Yilmaz et al 2009), also from AJ011618 and Chuck et al, 2014	SBP-domain protein 5	AT2G42200.1//SPL9//squamosa promoter binding protein-like 9	LOC_Os08g39890.1////OsSPL14 - SBP-box gene family member, expressed	0.118658	no	no	no	others	noCNV
GRMZM2G050556	CTTGTCTTCTGAGAGTTGGTGGTC	NA	GRMZM2G050556_T01	2099	0	-0.455	NA	NA	1	198574489	198576697	+	NA	NA	NA	Clathrin assembly protein	AT1G25240.1////ENTH/VHS/GAT family protein	LOC_Os08g36410.1////ANTH domain containing protein, expressed	0.0511148	no	no	no	others	noCNV
GRMZM2G136443	GTGAAGAGAGGTAGAGGGCGGC	NA	GRMZM2G136443_T03	374	1	-0.514	NA	NA	1	200655133	200664592	-	NA	NA	NA	Uncharacterized protein	AT4G24560.1//UBP16//ubiquitin-specific protease 16	LOC_Os08g37350.1////ubiquitin carboxyl-terminal hydrolase family protein, expressed	0.199309	no	no	no	others	noCNV
GRMZM2G161368	ATTAGTCCCTAGAAACCAAACACC	NA	GRMZM2G161368_T01	1937	0	-0.709	NA	NA	1	213136622	213138903	+	NA	NA	NA	Selenium-binding protein-like	AT3G47530.1////Pentatricopeptide repeat (PPR) superfamily protein	LOC_Os08g33700.1////pentatricopeptide, putative, expressed	0.895643	no	no	no	others	noCNV
GRMZM2G085249	AATGCTTCGAAGGACGAAGGACTT	NA	GRMZM2G085249_T01	1551	0	-0.726	NA	NA	1	218147403	218155498	+	aprl5	adenosine 5'-phosphosulfate reductase-like5	0	Uncharacterized protein	AT1G34780.1//APRL4,ATAPRL4//APR-like 4	LOC_Os08g31814.1////OsAPRL4 adenosine 5\'-phosphosulfate reductase-like OsAPRL4, expressed	0.00281152	no	no	no	UpOnDS	noCNV
GRMZM2G085249	AGACATGTATCTTGACGAAGACAC	NA	GRMZM2G085249_T02	948	1	-0.618	NA	NA	1	218147403	218155498	+	aprl5	adenosine 5'-phosphosulfate reductase-like5	0	Uncharacterized protein	AT1G34780.1//APRL4,ATAPRL4//APR-like 4	LOC_Os08g31814.1////OsAPRL4 adenosine 5\'-phosphosulfate reductase-like OsAPRL4, expressed	0.00281152	no	no	no	UpOnDS	noCNV
GRMZM2G085249	TGTGTTTATGAAGGTATGTCCT	NA	GRMZM2G085249_T01	1617	0.5	-0.457	NA	NA	1	218147403	218155498	+	aprl5	adenosine 5'-phosphosulfate reductase-like5	0	Uncharacterized protein	AT1G34780.1//APRL4,ATAPRL4//APR-like 4	LOC_Os08g31814.1////OsAPRL4 adenosine 5\'-phosphosulfate reductase-like OsAPRL4, expressed	0.00281152	no	no	no	UpOnDS	noCNV
GRMZM2G152408	CTAGAGCTAATAGTTAGTTGG	NA	GRMZM2G152408_T02	1853	0.5	-0.655	NA	NA	1	218248163	218253368	+	NA	NA	NA	Uncharacterized protein	AT1G67180.1////zinc finger (C3HC4-type RING finger) family protein / BRCT domain-containing protein	LOC_Os08g31930.1////BRCA1 C Terminus domain containing protein, expressed	0.102775	no	no	yes	others	noCNV
AC206198.3_FG001	TCCCTCCAGCTTCGGCATCTCC	NA	AC206198.3_FGT001	634	1	-0.493	NA	Gene snRNA splicing	1	219771139	219772224	+	NA	NA	NA	Uncharacterized protein	NA	NA	0.505215	no	no	no	others	noCNV
GRMZM2G447433	AGTTAGTACTAATATGAGGAATGA	NA	GRMZM2G447433_T06	1687	0	-0.494	NA	Gene rRNA	1	221349077	221357531	+	NA	NA	NA	Uncharacterized protein	AT1G15080.1//ATLPP2,ATPAP2,LPP2//lipid phosphate phosphatase 2	LOC_Os08g27040.1////lipid phosphatase protein, putative, expressed	0.334644	no	no	no	others	noCNV
GRMZM2G318882	TCGAGCTCCAGCACCATGTGC	NA	GRMZM2G318882_T01	655	0	-0.648	NA	Gene snRNA snoRNA	1	222596581	222597546	+	NA	NA	NA	Disease resistance response protein 206	AT5G42510.1////Disease resistance-responsive (dirigent-like protein) family protein	LOC_Os07g01620.1////dirigent, putative, expressed	0.00129337	no	no	no	others	noCNV
GRMZM2G135849	ACATGGATTGAGAGCTAACCGAAC	NA	GRMZM2G135849_T01	1299	0	-0.512	NA	NA	1	226894220	226895735	+	hagtf4	GNAT-transcription factor 4	assigned by the Grassius project, (Yilmaz et al 2009)	Acetyltransferase	AT1G03650.1////Acyl-CoA N-acyltransferases (NAT) superfamily protein	LOC_Os10g35680.1////acetyltransferase, GNAT family, putative, expressed	0.0508007	no	no	no	others	noCNV
GRMZM2G079428	AGACTGGACTGGCTGAGTGCATGC	NA	GRMZM2G079428_T04	70	0	-0.503	NA	NA	1	229910587	229926888	-	NA	NA	NA	NA	AT4G33630.1//EX1//Protein of unknown function (DUF3506)	LOC_Os10g34400.1////expressed protein	0.000229832	no	no	no	UpOnDS	noCNV
GRMZM2G079428	ACTGTTTGCAGAGTAGAGTTTGAA	NA	GRMZM2G079428_T05	2931	0	-0.521	NA	NA	1	229910587	229926888	-	NA	NA	NA	NA	AT4G33630.1//EX1//Protein of unknown function (DUF3506)	LOC_Os10g34400.1////expressed protein	0.000229832	no	no	no	UpOnDS	noCNV
GRMZM2G143883	ACTATCCAGCGACAACTAAAACGA	NA	GRMZM2G143883_T01	305	0	-0.545	NA	NA	1	232462370	232467510	+	NA	NA	NA	Uncharacterized protein	AT3G23410.1//ATFAO3,FAO3//fatty alcohol oxidase 3	LOC_Os10g33460.1////alcohol oxidase, putative, expressed	0.000148693	no	no	yes	DownOnDS	noCNV
GRMZM2G119544	ACCGTCTTGGTGGAGCAGCGGC	NA	GRMZM2G119544_T03	312	0.5	-0.483	NA	NA	1	241450769	241456729	+	NA	NA	NA	Uncharacterized protein	AT5G14710.1////	LOC_Os10g25600.1////expressed protein	0.304136	no	no	no	others	noCNV
GRMZM2G520535	CCGGCGCCTCTGCTCGCCGCCCGCC	NA	GRMZM2G520535_T01	688	1	-0.575	NA	NA	1	241566942	241588266	-	NA	NA	NA	Prolyl 4-hydroxylase 2%3B Uncharacterized protein	AT3G28480.1////Oxoglutarate/iron-dependent oxygenase	LOC_Os10g27340.2////oxidoreductase, putative, expressed	0.955585	no	no	no	others	noCNV
GRMZM2G113928	TCCAAAGACTTCAAAATTGGGA	NA	GRMZM2G113928_T01	1850	1	-0.461	NA	others	1	250618589	250624045	-	NA	NA	NA	Putative uncharacterized protein	AT4G21710.1//EMB1989,NRPB2,RPB2//DNA-directed RNA polymerase family protein	LOC_Os03g44484.1////DNA-directed RNA polymerase II subunit RPB2, putative, expressed	0.0901183	no	no	no	others	noCNV
GRMZM2G016602	GTTCGTTTCTGTCGGATTGGTGGG	NA	GRMZM2G016602_T01	1304	1	-0.615	NA	NA	1	252202771	252214106	-	NA	NA	NA	Protein recA%3B Uncharacterized protein	AT1G79050.1////recA DNA recombination family protein	LOC_Os03g43850.1////recA protein, putative, expressed	0.751477	no	no	no	others	noCNV
GRMZM2G352695	TGAGGCACTGTTGCGCGCTCCAGC	NA	GRMZM2G352695_T01	116	0.5	-0.489	NA	NA	1	254862420	254868235	-	NA	NA	NA	Uncharacterized protein	AT4G37640.1//ACA2//calcium ATPase 2	LOC_Os03g42020.1////calcium-transporting ATPase, plasma membrane-type, putative, expressed	6.72e-05	no	no	no	UpOnDS	noCNV
GRMZM2G107120	TGTTGTTGGGTGACATCTCTAT	NA	GRMZM2G107120_T02	1388	1	-0.537	NA	NA	1	258000453	258014201	+	NA	NA	NA	NA	NA	NA	0.336449	no	no	no	others	noCNV
GRMZM2G072898	AGTGAGGAGTGAGAAGATGATGGA	NA	GRMZM2G072898_T03	364	1	-0.563	NA	NA	1	261773001	261776149	-	NA	NA	NA	Uncharacterized protein	NA	LOC_Os03g48190.2////expressed protein	0.483276	no	no	no	others	noCNV
GRMZM2G113569	ACCCGAAACCCGAAACCCGATGGG	NA	GRMZM2G113569_T01	118	0	-0.469	NA	NA	1	262874792	262878724	+	NA	NA	NA	Putative uncharacterized protein	AT3G47850.1////	LOC_Os05g13390.1////expressed protein	0.121509	no	no	no	others	noCNV
GRMZM2G079668	ACTGTTGGAGACATGTTTTTGTGT	NA	GRMZM2G079668_T02	2881	0.5	-0.551	NA	NA	1	263209037	263214895	+	NA	NA	NA	Uncharacterized protein	AT5G49910.1//cpHsc70-2,CPHSC70-2EAT SHOCK PROTEIN 70-2,HSC70-7//chloroplast heat shock protein 70-2	LOC_Os05g23740.1////DnaK family protein, putative, expressed	0.11082	no	no	yes	others	noCNV
GRMZM2G323838	GAGGGGGAGAGAGAGGAGGACGGC	NA	GRMZM2G323838_T01	442	1	-0.56	NA	others	1	264021497	264031738	+	NA	NA	NA	NA	AT5G14520.1////pescadillo-related	LOC_Os03g49210.1////BRCA1 C Terminus domain containing protein, expressed	0.0199067	no	no	yes	UpOnDS	noCNV
GRMZM2G004160	AGGGGCATGCAGAGGAGGAGC	NA	GRMZM2G004160_T02	168	1	-0.56	zma-MIR528a	NA	1	267227977	267228945	-	NA	NA	NA	Chemocyanin%3B Uncharacterized protein	AT2G02850.1//ARPN//plantacyanin	LOC_Os03g50160.1////plastocyanin-like domain containing protein, putative, expressed	3.06e-13	no	yes	no	UpOnDS	noCNV
GRMZM2G023110	TGGATCAATAAGAGTGGTAGCT	NA	GRMZM2G023110_T01	1805	1	-0.729	NA	others	1	267933161	267936681	-	NA	NA	NA	Atypical receptor-like kinase MARK	AT1G48480.1//RKL1//receptor-like kinase 1	LOC_Os03g50450.1////inactive receptor kinase At2g26730 precursor, putative, expressed	0.000956764	no	no	no	DownOnDS	noCNV
GRMZM2G024104	CCAATCCCATCCAATCCATGTGTA	NA	GRMZM2G024104_T05	778	0.5	-0.68	NA	NA	1	267960169	267963551	-	gln2	glutamine synthetase2	Classical Gene from J.S	Glutamine synthetase root isozyme 2	AT1G66200.3//ATGSR2,GSR2//glutamine synthase clone F11	LOC_Os03g50490.1////glutamine synthetase, catalytic domain containing protein, expressed	2.5e-11	yes	no	no	UpOnDS	noCNV
GRMZM2G157727	AGCTTCTGCAGCAGCTTATCAGTT	NA	GRMZM2G157727_T01	1172	1	-0.518	NA	NA	1	269388274	269395277	-	phyA1	phytochromeA1	Classical Gene from J.S	Phytochrome	AT1G09570.1//FHY2,FRE1,HY8,PHYA//phytochrome A	LOC_Os03g51030.1////phytochrome A, putative, expressed	6.47e-12	no	yes	no	UpOnDS	noCNV
GRMZM2G149952	TGAAGTGTTTGGGGGAACTC	NA	GRMZM2G149952_T01	453	0.5	-0.603	zma-MIR395p,zma-MIR395o,zma-MIR395n,zma-MIR395j,zma-MIR395i,zma-MIR395h,zma-MIR395g,zma-MIR395f,zma-MIR395e,zma-MIR395d,zma-MIR395a,zma-MIR395b	Gene miRNA	1	275157705	275161519	-	aps1	ATP sulfurylase1	from: EU973074	Uncharacterized protein	AT4G14680.1//APS3//Pseudouridine synthase/archaeosine transglycosylase-like family protein	LOC_Os03g53230.1////bifunctional 3-phosphoadenosine 5-phosphosulfate synthetase, putative, expressed	0.0138899	no	yes	no	UpOnDS	noCNV
GRMZM2G464782	AGATACCTGTTCACACATTATACT	NA	GRMZM2G464782_T02	1025	1	-0.568	NA	NA	1	277099198	277112873	+	NA	NA	NA	Putative uncharacterized protein	AT2G39950.1////	LOC_Os07g01060.1////expressed protein	6.79e-05	no	no	no	UpOnDS	DownCNV/PAV
GRMZM2G107798	AGCAGTCTTTTATGTTTTGTTA	NA	GRMZM2G107798_T01	2025	1	-0.635	NA	NA	1	280568776	280571672	-	NA	NA	NA	Peptidase/ serine-type peptidase	AT1G06870.1////Peptidase S24/S26A/S26B/S26C family protein	LOC_Os03g55640.1////OsSigP2 - Putative Type I Signal Peptidase homologue; employs a putative Ser/Lys catalytic dyad, expressed	0.0187127	no	no	no	DownOnDS	noCNV
GRMZM2G107818	ATGTTTCTGTTGCAACGCACGGGC	NA	GRMZM2G107818_T01	45	1	-0.517	NA	NA	1	280573720	280574586	-	NA	NA	NA	NA	NA	NA	0.427306	no	no	no	others	noCNV
GRMZM2G067964	CTGGCTCCCGCTGCCCGCAGGC	NA	GRMZM2G067964_T02	294	1	-0.478	NA	NA	1	282939188	282940987	+	NA	NA	NA	Uncharacterized protein	AT1G48140.1////dolichol-phosphate mannosyltransferase-related	LOC_Os02g51420.1////expressed protein	0.0426957	no	no	no	UpOnDS	noCNV
GRMZM2G067964	GCGGCGCGACCGTCTTGGTGGA	NA	GRMZM2G067964_T02	326	0.5	-0.472	NA	NA	1	282939188	282940987	+	NA	NA	NA	Uncharacterized protein	AT1G48140.1////dolichol-phosphate mannosyltransferase-related	LOC_Os02g51420.1////expressed protein	0.0426957	no	no	no	UpOnDS	noCNV
GRMZM2G017290	CCAATACACATGGATTGGATGGGA	NA	GRMZM2G017290_T01	1411	0	-0.474	NA	NA	1	283501470	283502945	-	NA	NA	NA	Photosystem I reaction center subunit III	AT1G31330.1//PSAF//photosystem I subunit F	LOC_Os03g56670.1////photosystem I reaction center subunit III, chloroplast precursor, putative, expressed	0.402334	no	no	yes	others	noCNV
GRMZM2G009901	AGTGCACAGGCTGTAGCAGGCTAT	NA	GRMZM2G009901_T01	189	0.5	-0.612	NA	NA	1	290272790	290275287	+	NA	NA	NA	Uncharacterized protein	AT5G28150.1////Plant protein of unknown function (DUF868)	LOC_Os03g59200.1////expressed protein	0.535067	no	no	no	others	noCNV
GRMZM5G862109	AGAATCTTGATGATGCTGCAT	ZmEREB11	GRMZM5G862109_T01	1558	0.5	-0.571	zma-MIR172c,zma-MIR172b,zma-MIR172d,zma-MIR172a	Gene miRNA	1	292966682	292970925	+	ts6	tasselseed6	Classical Gene from J.S	Indeterminate spikelet 1	AT2G28550.3//RAP2.7,TOE1//related to AP2.7	LOC_Os03g60430.2////AP2 domain containing protein, expressed	0.255016	no	no	no	others	noCNV
GRMZM2G170137	AAGCTGGTCAGAAAAAAGCTGAAC	ZmMTERF6	GRMZM2G170137_T05	1211	0	-0.537	NA	NA	1	296849440	296855068	-	mterf6	mTERF-domain protein6	assigned by the Grassius project, (Yilmaz et al 2009)	Uncharacterized protein	AT1G72175.1////RING/U-box protein with domain of unknown function (DUF 1232)	LOC_Os03g62250.1////zinc finger, C3HC4 type domain containing protein, expressed	0.87327	no	no	no	others	noCNV
GRMZM5G878153	GTTGCAACGCACGGGCACTTACCT	NA	GRMZM5G878153_T02	1250	0	-0.664	NA	NA	1	297022672	297039866	+	NA	NA	NA	Uncharacterized protein	AT3G03320.1////RNA-binding ASCH domain protein	LOC_Os11g16420.2////protein of unknown function containing protein, expressed	0.300234	no	no	no	others	noCNV
GRMZM2G115372	GAAAGATTTTGACTTGTTTGGGAT	NA	GRMZM2G115372_T01	803	0	-0.48	NA	NA	1	298856172	298867621	-	NA	NA	NA	ATPase	AT2G25530.1////AFG1-like ATPase family protein	LOC_Os03g63500.1////ATPase, AFG1 family domain containing protein, expressed	0.71345	no	no	no	others	noCNV
GRMZM2G436199	AGATTTAGGGGGAAAAATATAGGG	NA	GRMZM2G436199_T02	774	1	-0.51	NA	NA	2	1720231	1721721	-	NA	NA	NA	Uncharacterized protein	AT1G50320.1//ATHX,ATX,THX//thioredoxin X	LOC_Os04g57930.1////thioredoxin, putative, expressed	0.536512	no	no	no	others	noCNV
GRMZM2G047018	ATATAGGGGGAAGAGAACGCTGAC	NA	GRMZM2G047018_T01	668	1	-0.529	NA	NA	2	3397726	3400751	+	NA	NA	NA	PHD finger-like domain-containing protein 5A%3B Uncharacterized protein	AT2G30000.1////PHF5-like protein	LOC_Os04g56760.1////PHF5-like protein domain containing protein, expressed	0.263798	no	no	no	others	noCNV
GRMZM2G400961	GGGTCTCACATCTCTATATAAGGA	NA	GRMZM2G400961_T01	1702	0	-0.623	NA	NA	2	5465397	5467995	+	NA	NA	NA	Uncharacterized protein	NA	LOC_Os04g55610.1////expressed protein	0.764688	no	no	no	others	noCNV
GRMZM2G098239	AGTGTCTTAGCTCTATATTCGAGA	NA	GRMZM2G098239_T03	1759	1	-0.538	NA	NA	2	10630672	10633711	-	gl2	glossy2	Classical Gene from J.S	Orf protein	AT3G23840.1////HXXXD-type acyl-transferase family protein	LOC_Os04g52164.1////transferase family protein, putative, expressed	0.127446	no	no	yes	others	noCNV
GRMZM2G463267	TGGTGACCGGGGATCCCGAGGGGA	NA	GRMZM2G463267_T02	580	0.5	-0.597	NA	NA	2	12907154	12911043	-	NA	NA	NA	Uncharacterized protein	AT4G19006.1////Proteasome component (PCI) domain protein	LOC_Os01g32800.2////proteasome subunit, putative, expressed	0.0614534	no	no	no	others	DownCNV/PAV
GRMZM2G047347	CAAGTTTGAATAGTCCGGTATCAA	NA	GRMZM2G047347_T01	1512	1	-0.654	NA	NA	2	18827068	18842114	+	NA	NA	NA	Uncharacterized protein	AT5G65780.1//ATBCAT-5//branched-chain amino acid aminotransferase 5 / branched-chain amino acid transaminase 5 (BCAT5)	LOC_Os04g47190.1////aminotransferase domain containing protein, putative, expressed	0.233209	no	no	no	others	noCNV
GRMZM2G349344	ACCTTTATAGATACTTCTGTGA	NA	GRMZM2G349344_T01	1575	1	-0.592	NA	NA	2	18828163	18834426	-	NA	NA	NA	NA	AT2G45910.1////U-box domain-containing protein kinase family protein	LOC_Os10g40100.1////protein kinase, putative, expressed	0.422626	no	no	no	others	noCNV
GRMZM2G178693	TTTTCTTTTCTTTTTCATGGC	NA	GRMZM2G178693_T01	1163	1	-0.589	NA	others	2	28493204	28495467	-	pip2a	plasma membrane intrinsic protein2	Classical Gene from J.S	Aquaporin PIP2-5	AT2G37170.1//PIP2;2,PIP2B//plasma membrane intrinsic protein 2	LOC_Os04g44060.1////aquaporin protein, putative, expressed	0.255039	no	no	no	others	noCNV
GRMZM2G045005	ACCGTCTTGGTGGAGCAGCGGC	NA	GRMZM2G045005_T01	509	0.5	-0.45	NA	NA	2	38044187	38048031	+	tgz21	transglutaminase21	from: AJ488103	Uncharacterized protein	AT1G67170.1////	LOC_Os04g40300.1////transglutaminase, putative, expressed	1.87e-05	no	no	no	UpOnDS	noCNV
GRMZM5G804251	ACCATGGGGAACGAGCCGGAGC	NA	GRMZM5G804251_T01	811	0.5	-0.496	NA	NA	2	40582404	40584332	-	NA	NA	NA	Uncharacterized protein	NA	NA	0.342015	no	no	no	others	noCNV
GRMZM5G804251	GAAAATCGCTCGGCAGAGAGGA	NA	GRMZM5G804251_T01	774	0.5	-0.577	NA	NA	2	40582404	40584332	-	NA	NA	NA	Uncharacterized protein	NA	NA	0.342015	no	no	no	others	noCNV
GRMZM2G355906	TCCACTGCACAACTTTATGGTG	NA	GRMZM2G355906_T04	1037	0	-0.493	NA	NA	2	45349199	45380559	-	NA	NA	NA	Uncharacterized protein	AT1G65960.2//GAD2//glutamate decarboxylase 2	LOC_Os04g37500.1////glutamate decarboxylase, putative, expressed	1.29e-22	no	no	yes	DownOnDS	noCNV
GRMZM2G355906	TTTTGTCCCAGATCGATTGATT	NA	GRMZM2G355906_T04	1612	0	-0.473	NA	NA	2	45349199	45380559	-	NA	NA	NA	Uncharacterized protein	AT1G65960.2//GAD2//glutamate decarboxylase 2	LOC_Os04g37500.1////glutamate decarboxylase, putative, expressed	1.29e-22	no	no	yes	DownOnDS	noCNV
GRMZM2G355906	CCTTAACAAGCTCGCAGACGTC	NA	GRMZM2G355906_T03	499	0	-0.692	NA	NA	2	45349199	45380559	-	NA	NA	NA	Uncharacterized protein	AT1G65960.2//GAD2//glutamate decarboxylase 2	LOC_Os04g37500.1////glutamate decarboxylase, putative, expressed	1.29e-22	no	no	yes	DownOnDS	noCNV
GRMZM2G355906	TGAAGGACCCCAAGAAGAGATT	NA	GRMZM2G355906_T04	1	0	-0.685	NA	NA	2	45349199	45380559	-	NA	NA	NA	Uncharacterized protein	AT1G65960.2//GAD2//glutamate decarboxylase 2	LOC_Os04g37500.1////glutamate decarboxylase, putative, expressed	1.29e-22	no	no	yes	DownOnDS	noCNV
GRMZM2G329885	AGGGCTAGTTTGGAAACTCAAATC	NA	GRMZM2G329885_T01	1003	0.5	-0.563	NA	NA	2	51729634	51734141	-	NA	NA	NA	NA	NA	LOC_Os02g34500.1////expressed protein	0.679822	no	no	no	others	noCNV
GRMZM2G178321	AATACTGTTCACTATTTATAGGCA	NA	GRMZM2G178321_T01	827	0	-0.518	NA	NA	2	76828991	76829964	-	NA	NA	NA	Uncharacterized protein	NA	NA	0.781213	no	no	no	others	noCNV
GRMZM2G095464	CGAACTGAAGGAAGCGCGGACC	NA	GRMZM2G095464_T01	669	0.5	-0.482	NA	NA	2	97973299	97974481	+	NA	NA	NA	Uncharacterized protein	NA	NA	0.0579215	no	no	no	others	noCNV
GRMZM2G074083	ACCTGTATATGGTAGATGTTGGTT	NA	GRMZM2G074083_T01	1099	0	-0.493	NA	NA	2	110572278	110574210	+	NA	NA	NA	Uncharacterized protein	NA	LOC_Os04g05010.1////CBS domain containing membrane protein, putative, expressed	0.047073	no	no	yes	others	noCNV
GRMZM2G307553	ACCAGATCGATATCGGGACTCGAC	NA	GRMZM2G307553_T01	1048	1	-0.469	NA	NA	2	138681422	138683146	+	NA	NA	NA	Uncharacterized protein	NA	NA	0.915593	no	no	no	others	DownCNV/PAV
GRMZM2G436688	ATACAGTGGGCAAATTGCAACT	NA	GRMZM2G436688_T01	884	1	-0.711	NA	NA	2	141516578	141517526	-	NA	NA	NA	NA	NA	LOC_Os12g06280.1////expressed protein	0.0516301	no	no	no	others	noCNV
GRMZM2G127418	GTTCGTTTGTGTCGGATTGGTGGG	NA	GRMZM2G127418_T01	61	0.5	-0.521	NA	NA	2	144827059	144828816	+	bx14	benzoxazinone synthesis14	Handrick et al., 2016	O-methyltransferase ZRP4%3B Uncharacterized protein	AT4G35160.1////O-methyltransferase family protein	LOC_Os05g43940.1////O-methyltransferase, putative, expressed	0.222988	no	no	no	others	noCNV
GRMZM2G166245	GTTACAAATTATAAACGAGTCGAG	NA	GRMZM2G166245_T02	1562	0	-0.602	NA	NA	2	157870135	157872675	+	NA	NA	NA	Uncharacterized protein	AT2G21370.1//XK-1,XK1//xylulose kinase-1	LOC_Os07g22650.1////expressed protein	0.129584	no	no	no	others	noCNV
GRMZM2G103345	AGCTTCTTCACAAATTTAAGCAGA	NA	GRMZM2G103345_T02	2744	0	-0.511	NA	NA	2	165895809	165900280	-	NA	NA	NA	NA	AT3G10770.1////Single-stranded nucleic acid binding R3H protein	LOC_Os09g39462.1////nucleic acid binding protein, putative, expressed	0.015345	no	no	no	UpOnDS	noCNV
GRMZM2G389285	AGATGATGCGTACTGATTAGACTT	NA	GRMZM2G389285_T01	66	0	-0.583	NA	NA	2	188282413	188285223	-	NA	NA	NA	PUP1	AT1G28220.1//ATPUP3,PUP3//purine permease 3	LOC_Os09g29210.1////purine permease, putative, expressed	0.542485	no	no	no	others	DownCNV/PAV
GRMZM2G126018	TTGACAGAAGAGAGTGAGCAC	ZmSBP23	GRMZM2G126018_T02	896	1	-0.758	zma-MIR156b,zma-MIR156d	Gene miRNA	2	190489085	190493109	-	sbp23	SBP-transcription factor 23	assigned by the Grassius project, (Yilmaz et al 2009)	Uncharacterized protein	AT2G42200.1//SPL9//squamosa promoter binding protein-like 9	LOC_Os09g31438.1////OsSPL17 - SBP-box gene family member, expressed	0.325129	no	no	no	others	noCNV
GRMZM2G126018	TTGACAGAAGAGAGCGAGCAC	ZmSBP23	GRMZM2G126018_T01	978	1	-0.588	zma-MIR156k	Gene miRNA	2	190489085	190493109	-	sbp23	SBP-transcription factor 23	assigned by the Grassius project, (Yilmaz et al 2009)	Uncharacterized protein	AT2G42200.1//SPL9//squamosa promoter binding protein-like 9	LOC_Os09g31438.1////OsSPL17 - SBP-box gene family member, expressed	0.325129	no	no	no	others	noCNV
GRMZM2G099780	GATACCGGACTATTCAAACTTGTT	NA	GRMZM2G099780_T01	2218	0	-0.648	NA	NA	2	193248741	193255761	+	NA	NA	NA	Uncharacterized protein	AT2G33490.1////hydroxyproline-rich glycoprotein family protein	LOC_Os09g33510.1////hydroxyproline-rich glycoprotein family protein, putative, expressed	0.103275	no	no	yes	others	noCNV
GRMZM2G078124	AATCTATCGAGGTCTGAATAGCCT	NA	GRMZM2G078124_T01	2172	1	-0.507	NA	NA	2	193348716	193353246	-	NA	NA	NA	Rhodopsin-like receptor	NA	NA	0.11694	no	no	no	others	noCNV
GRMZM2G164945	ATTTTACAGTTTCATTTACAGGTT	NA	GRMZM2G164945_T01	1913	0	-0.506	NA	NA	2	194814425	194816502	-	NA	NA	NA	NA	AT2G28100.1//ATFUC1,FUC1//alpha-L-fucosidase 1	LOC_Os09g34920.1////glycosyl hydrolase family 29, putative, expressed	0.000160238	no	no	yes	DownOnDS	noCNV
GRMZM2G039811	AGGGCTTGTTCGGTTATTTTCAAT	NA	GRMZM2G039811_T01	2346	1	-0.685	NA	NA	2	198972487	198976561	+	NA	NA	NA	Uncharacterized protein	AT5G10840.1////Endomembrane protein 70 protein family	LOC_Os09g38530.1////transmembrane 9 superfamily member, putative, expressed	0.273621	no	no	no	others	noCNV
GRMZM2G127714	ATATGTATTTGGATATAAGATAGA	NA	GRMZM2G127714_T01	737	0	-0.603	NA	NA	2	203714137	203720141	+	NA	NA	NA	Uncharacterized protein	AT5G57700.3////BNR/Asp-box repeat family protein	LOC_Os07g33220.1////BNR/Asp-box repeat family protein, putative, expressed	0.472922	no	no	no	others	noCNV
GRMZM2G001820	CTGGAGAAGGTGTTGTATGCCG	NA	GRMZM2G001820_T01	1264	1	-0.513	NA	NA	2	203790979	203797876	+	NA	NA	NA	Uncharacterized protein	AT5G57700.3////BNR/Asp-box repeat family protein	LOC_Os07g33220.1////BNR/Asp-box repeat family protein, putative, expressed	9.08e-09	no	no	no	DownOnDS	noCNV
GRMZM2G327406	TGGAGGGAGGAGGGAGAAGGGC	NA	GRMZM2G327406_T09	1497	1	-0.473	NA	NA	2	207153243	207160798	+	NA	NA	NA	Adenylyl-sulfate kinase	AT3G03900.1//APK3//adenosine-5\'-phosphosulfate (APS) kinase 3	LOC_Os07g38560.1////adenylyl-sulfate kinase, putative, expressed	0.431081	no	no	no	others	noCNV
GRMZM2G038519	GTCGATTAGAGGAGTCTAGGTCGG	NA	GRMZM2G038519_T03	938	0	-0.47	NA	NA	2	207611861	207618663	+	lhca1	light harvesting complex A1	from: Entrez Gene 100191715	Chlorophyll a-b binding protein	AT3G61470.1//LHCA2//photosystem I light harvesting complex gene 2	LOC_Os07g38960.1////chlorophyll A-B binding protein, putative, expressed	0.0366821	no	no	yes	DownOnDS	noCNV
GRMZM2G075002	AGCAAGTTGGGGTAGGCTAGAG	NA	GRMZM2G075002_T02	650	0	-0.466	NA	NA	2	213830471	213835107	-	NA	NA	NA	CBL-interacting serine/threonine-protein kinase 1	AT3G17510.1//CIPK1,SnRK3.16//CBL-interacting protein kinase 1	LOC_Os07g44290.1////CAMK_KIN1/SNF1/Nim1_like.29 - CAMK includes calcium/calmodulin depedent protein kinases, expressed	0.000188137	no	no	yes	others	noCNV
GRMZM2G010551	CGGTCTCCAAAATATAACTTTGAC	NA	GRMZM2G010551_T03	2342	0	-0.531	NA	NA	2	217268308	217272447	+	NA	NA	NA	Uncharacterized protein	AT2G21950.1//SKIP6//SKP1 interacting partner 6	LOC_Os07g47650.1////OsFBK19 - F-box domain and kelch repeat containing protein, expressed	0.550166	no	no	no	others	noCNV
GRMZM2G010551	CACATGGATTGGATGGGATTGGAA	NA	GRMZM2G010551_T04	24	1	-0.573	NA	NA	2	217268308	217272447	+	NA	NA	NA	Uncharacterized protein	AT2G21950.1//SKIP6//SKP1 interacting partner 6	LOC_Os07g47650.1////OsFBK19 - F-box domain and kelch repeat containing protein, expressed	0.550166	no	no	no	others	noCNV
GRMZM2G048680	ATACACCCCTTAAACACCTTAAGA	NA	GRMZM2G048680_T01	3162	1	-0.461	NA	NA	2	220901378	220907333	-	NA	NA	NA	NA	AT1G43850.1//SEU//SEUSS transcriptional co-regulator	LOC_Os11g10070.1////transcriptional corepressor SEUSS, putative, expressed	0.925229	no	no	no	others	noCNV
GRMZM2G401511	ATAGACACTCCATTGTACAATAGA	NA	GRMZM2G401511_T01	1398	0	-0.5	NA	NA	2	222319674	222321136	+	NA	NA	NA	Plant-specific domain TIGR01627 family protein	AT1G67330.1////Protein of unknown function (DUF579)	LOC_Os11g29780.1////plant-specific domain TIGR01627 family protein, expressed	0.00111413	no	no	yes	UpOnDS	noCNV
GRMZM2G094939	GTGCGAGAGGTCCCGAGTT	NA	GRMZM2G094939_T01	771	0.5	-0.525	NA	Gene tRNA	2	228766706	228767613	-	NA	NA	NA	NA	NA	NA	0.66174	no	no	no	others	DownCNV/PAV
GRMZM2G445163	AGACCCACGGGTAGAATATTTAGC	NA	GRMZM2G445163_T02	877	0	-0.474	NA	NA	2	229540315	229544610	+	NA	NA	NA	Uncharacterized protein	AT2G22120.2////RING/FYVE/PHD zinc finger superfamily protein	LOC_Os11g39130.1////zinc finger, C3HC4 type family protein, expressed	0.0736006	no	no	no	others	noCNV
GRMZM2G104081	GGTCGTGGTCGTGGCCGAGGGA	NA	GRMZM2G104081_T02	50	1	-0.692	NA	NA	3	7079526	7083312	+	hex1	hexokinase1	from EU971594 & Zhou et al., 2014; Zhang et al., 2014	Uncharacterized protein	AT4G29130.1//ATHXK1,GIN2,HXK1//hexokinase 1	LOC_Os01g09460.1////hexokinase, putative, expressed	2.08e-16	no	yes	no	UpOnDS	noCNV
GRMZM2G009282	GGGCTTTTGAGATTTTCCTGGGAT	NA	GRMZM2G009282_T01	3320	1	-0.57	NA	NA	3	22821827	22827568	-	NA	NA	NA	Uncharacterized protein	AT1G68560.1//ATXYL1,TRG1,XYL1//alpha-xylosidase 1	LOC_Os01g03950.1////glycosyl hydrolase, family 31, putative, expressed	5.42e-09	no	yes	no	DownOnDS	noCNV
GRMZM2G051622	TTTTACATTTACATTCTTTGGG	NA	GRMZM2G051622_T01	2353	1	-0.505	NA	NA	3	29473573	29480102	+	NA	NA	NA	Uncharacterized protein	AT1G26110.1//DCP5//decapping 5	LOC_Os01g02090.1////expressed protein	0.692553	no	no	no	others	noCNV
EF517601.1_FG010	TTCTTCAGTAACGGTGGCAGCT	ZmGBP21	EF517601.1_FGT010	926	1	-0.575	NA	NA	3	34497929	34499128	-	gbptf21	GeBP-transcription factor 21	assigned by the Grassius project, (Yilmaz et al 2009)	Uncharacterized protein	AT5G28040.1////DNA-binding storekeeper protein-related transcriptional regulator	LOC_Os01g14720.1////transcription regulator, putative, expressed	0.467407	no	no	no	others	noCNV
GRMZM2G151807	GAAGTGCTTTTCCAAAATGAACT	NA	GRMZM2G151807_T01	2410	0.5	-0.46	NA	NA	3	49989997	49992537	+	NA	NA	NA	NA	NA	NA	0.79725	no	no	no	others	noCNV
GRMZM2G119894	CCCGCCGGCGAGCGCTTTCCT	NA	GRMZM2G119894_T01	1620	1	-0.479	NA	NA	3	50094925	50101424	-	NA	NA	NA	NA	AT1G02520.1//PGP11//P-glycoprotein 11	LOC_Os01g74630.1////expressed protein	0.0093854	no	no	no	DownOnDS	noCNV
GRMZM2G381138	ACAGCTGCATGTCTAGAGGTAGAG	NA	GRMZM2G381138_T01	547	0	-0.59	NA	NA	3	62971224	62974408	+	NA	NA	NA	Uncharacterized protein	NA	NA	3.17e-05	no	no	no	UpOnDS	noCNV
GRMZM2G147811	ACATGGATTGAGAGCTAACCGAAC	NA	GRMZM2G147811_T02	4162	0	-0.544	NA	NA	3	95873973	95885088	-	NA	NA	NA	NA	AT3G25840.1////Protein kinase superfamily protein	LOC_Os12g44330.1////serine/threonine-protein kinase PRP4, putative, expressed	6.45e-05	no	no	yes	UpOnDS	noCNV
GRMZM2G343974	AGTTCAACGGATTATAATACTAAA	NA	GRMZM2G343974_T01	773	0.5	-0.513	NA	others	3	110270681	110272255	+	NA	NA	NA	NA	AT1G72610.1//ATGER1,GER1,GLP1//germin-like protein 1	LOC_Os08g35760.1////Cupin domain containing protein, expressed	0.21939	no	no	no	others	noCNV
GRMZM2G082203	TAGAGGGCAGATATGTAGGCGT	NA	GRMZM2G082203_T02	39	0.5	-0.711	NA	NA	3	128114749	128119422	+	rte2	rotten ear2	0	Uncharacterized protein	AT2G47160.1//BOR1//HCO3- transporter family	LOC_Os12g37840.2////boron transporter protein, putative, expressed	5.22e-21	no	yes	no	DownOnDS	noCNV
GRMZM2G418515	GATTGGATGGGTTTGAATCCCAAA	NA	GRMZM2G418515_T01	4355	1	-0.457	NA	NA	3	128250845	128259096	+	NA	NA	NA	NA	AT4G24680.1//MOS1//modifier of snc1	LOC_Os12g37860.1////expressed protein	1.98e-10	no	no	yes	UpOnDS	noCNV
GRMZM2G310069	TGTCCGGACCGCGGACCGTCCGGC	NA	GRMZM2G310069_T01	1769	1	-0.692	NA	NA	3	148137416	148141339	-	NA	NA	NA	Uncharacterized protein	AT3G55850.1//LAF3,LAF3 ISF1,LAF3 ISF2//Amidohydrolase family	LOC_Os01g72350.1////amidohydrolase, putative, expressed	1.98e-12	no	no	no	UpOnDS	noCNV
GRMZM2G062524	TAGCTCTTCCTGTTTGGATAT	NA	GRMZM2G062524_T02	4436	1	-0.537	NA	NA	3	151087028	151096088	+	NA	NA	NA	NA	AT1G50240.2//FU//Protein kinase family protein with ARM repeat domain	LOC_Os12g24550.1////expressed protein	0.0899094	no	yes	no	others	noCNV
GRMZM2G155334	TGGCCTGTGAGGAATTACAATT	NA	GRMZM2G155334_T01	504	1	-0.492	NA	NA	3	152529948	152531199	-	NA	NA	NA	NA	AT2G41530.1//ATSFGH,SFGH//S-formylglutathione hydrolase	LOC_Os01g71300.1////S-formylglutathione hydrolase, putative, expressed	0.518477	no	no	no	others	noCNV
GRMZM2G011731	AGAGAAGTAATCCGGCTAGGAATT	NA	GRMZM2G011731_T01	1301	0.5	-0.478	NA	NA	3	170588963	170591516	+	NA	NA	NA	Putative uncharacterized protein	AT4G10080.1////	LOC_Os01g66150.1////expressed protein	0.0308712	no	yes	no	UpOnDS	noCNV
GRMZM2G011731	GTTGTACCGGAATGAGCCAGGATT	NA	GRMZM2G011731_T01	1355	0	-0.607	NA	NA	3	170588963	170591516	+	NA	NA	NA	Putative uncharacterized protein	AT4G10080.1////	LOC_Os01g66150.1////expressed protein	0.0308712	no	yes	no	UpOnDS	noCNV
GRMZM2G386991	GGAGAACTCTGTTTATATACAGGT	NA	GRMZM2G386991_T01	1970	1	-0.466	NA	others	3	181704716	181709327	+	NA	NA	NA	Uncharacterized protein	AT3G53570.1//AFC1,AME2,FC1//FUS3-complementing gene 1	LOC_Os01g62080.1////serine/threonine-protein kinase AFC1, putative, expressed	0.559033	no	no	no	others	noCNV
GRMZM2G349651	AATAAAAAGAAACGGAGGGAG	NA	GRMZM2G349651_T01	144	0	-0.742	NA	NA	3	181880047	181882632	-	NA	NA	NA	Histone H4	AT1G07660.2////Histone superfamily protein	LOC_Os02g45940.1////Core histone H2A/H2B/H3/H4 domain containing protein, putative, expressed	0.233684	no	no	no	others	noCNV
GRMZM2G099036	AACTATAGACGGCTGCTGATGGTC	NA	GRMZM2G099036_T01	1998	1	-0.574	NA	NA	3	183919467	183924567	+	NA	NA	NA	Uncharacterized protein	AT3G56140.1////Protein of unknown function (DUF399 and DUF3411)	LOC_Os01g61120.1////expressed protein	0.381546	no	no	no	others	noCNV
GRMZM2G357399	CAGTATTTATAGCATTGGGGTT	NA	GRMZM2G357399_T02	410	1	-0.461	NA	NA	3	186634201	186637449	-	NA	NA	NA	ADP-ribosylation factor%3B Uncharacterized protein	AT2G47170.1//ARF1A1C//Ras-related small GTP-binding family protein	LOC_Os07g12170.1////ADP-ribosylation factor, putative, expressed	0.00110934	no	no	no	DownOnDS	noCNV
GRMZM2G085005	ATTGGAAAAAATTGTGAAGAAGTT	NA	GRMZM2G085005_T03	959	1	-0.579	NA	NA	3	189711783	189713780	+	NA	NA	NA	Partner of Nob1%3B Uncharacterized protein	AT3G13230.1////RNA-binding KH domain-containing protein	LOC_Os01g57910.1////KH domain containing protein, putative, expressed	8.58e-05	no	no	no	UpOnDS	DownCNV/PAV
GRMZM2G082745	ACTCTATCCAACAATTCTCCGCGG	NA	GRMZM2G082745_T03	276	1	-0.608	NA	NA	3	191054033	191064203	+	NA	NA	NA	ULT transcription factor%3B Uncharacterized protein	AT4G28190.1//ULT,ULT1//Developmental regulator, ULTRAPETALA	LOC_Os01g57240.1////expressed protein	0.00470195	no	no	no	DownOnDS	noCNV
GRMZM2G582965	GACAGTGGCGCGGAAGAGGGGC	NA	GRMZM2G582965_T01	290	0	-0.495	NA	NA	3	192844995	192851611	-	NA	NA	NA	Uncharacterized protein	AT2G28380.1//DRB2//dsRNA-binding protein 2	LOC_Os01g56520.1////double-stranded RNA binding motif containing protein, expressed	9.18e-09	no	no	yes	UpOnDS	noCNV
GRMZM2G156877	GTTTGGTTTCTTTAGTCTAGGGAC	NA	GRMZM2G156877_T03	1055	0.5	-0.465	NA	NA	3	194233310	194235176	+	gst8	glutathione transferase8	0	Glutathione S-transferase IV%3B Uncharacterized protein	AT3G62760.1//ATGSTF13//Glutathione S-transferase family protein	LOC_Os01g27210.1////glutathione S-transferase, putative, expressed	7.29e-07	yes	no	no	others	noCNV
GRMZM2G122072	TTGTGTTCTTTCGAGCTCTTGCGC	NA	GRMZM2G122072_T01	3132	0	-0.579	NA	NA	3	200282333	200292465	-	NA	NA	NA	Uncharacterized protein	AT1G05230.1//HDG2//homeodomain GLABROUS 2	LOC_Os04g53540.4////homeobox and START domains containing protein, putative, expressed	0.000257014	no	yes	no	others	DownCNV/PAV
GRMZM2G122072	GGAGGAGGTGGAGGGTGGTGGT	NA	GRMZM2G122072_T01	318	1	-0.628	NA	NA	3	200282333	200292465	-	NA	NA	NA	Uncharacterized protein	AT1G05230.1//HDG2//homeodomain GLABROUS 2	LOC_Os04g53540.4////homeobox and START domains containing protein, putative, expressed	0.000257014	no	yes	no	others	DownCNV/PAV
GRMZM2G122072	AAGAGCTCTAGCATTCAATTCTAG	NA	GRMZM2G122072_T01	3225	0.5	-0.607	NA	NA	3	200282333	200292465	-	NA	NA	NA	Uncharacterized protein	AT1G05230.1//HDG2//homeodomain GLABROUS 2	LOC_Os04g53540.4////homeobox and START domains containing protein, putative, expressed	0.000257014	no	yes	no	others	DownCNV/PAV
GRMZM2G022625	TCAGCTGATTTTAGCACCTCGA	NA	GRMZM2G022625_T02	1272	0	-0.775	NA	others	3	200773599	200779461	-	NA	NA	NA	GTP-binding protein%3B Uncharacterized protein	AT5G11480.1////P-loop containing nucleoside triphosphate hydrolases superfamily protein	LOC_Os01g53150.1////GTPase of unknown function domain containing protein, putative, expressed	0.350585	no	no	no	others	noCNV
GRMZM2G069061	AGACTAAAGGAACCAAACAGATCC	NA	GRMZM2G069061_T01	1046	0.5	-0.459	NA	NA	3	202212384	202221141	-	NA	NA	NA	NADH-ubiquinone oxidoreductase 20 kDa subunit%3B Uncharacterized protein	AT5G11770.1////NADH-ubiquinone oxidoreductase 20 kDa subunit, mitochondrial	LOC_Os01g52214.1////ubiquinone oxidoreductase, putative, expressed	0.855555	no	no	no	others	noCNV
GRMZM2G069061	ACATGTTAGGGACTAAACTTTAGT	NA	GRMZM2G069061_T01	1093	0.5	-0.701	NA	NA	3	202212384	202221141	-	NA	NA	NA	NADH-ubiquinone oxidoreductase 20 kDa subunit%3B Uncharacterized protein	AT5G11770.1////NADH-ubiquinone oxidoreductase 20 kDa subunit, mitochondrial	LOC_Os01g52214.1////ubiquinone oxidoreductase, putative, expressed	0.855555	no	no	no	others	noCNV
GRMZM2G181135	GTTGATTTTGGACGGTTTTTACCA	NA	GRMZM2G181135_T01	1693	0.5	-0.48	NA	NA	3	202838553	202840720	-	NA	NA	NA	Uncharacterized protein	AT1G34060.1////Pyridoxal phosphate (PLP)-dependent transferases superfamily protein	LOC_Os01g52010.1////alliin lyase precursor, putative, expressed	0.232081	no	no	no	others	noCNV
GRMZM2G148796	AATAACAGACTCATAGATAGAATA	NA	GRMZM2G148796_T01	704	1	-0.487	NA	NA	3	210498003	210500683	-	NA	NA	NA	NA	AT3G15120.1////P-loop containing nucleoside triphosphate hydrolases superfamily protein	LOC_Os01g47800.1////AAA-type ATPase family protein, putative, expressed	0.220121	no	no	no	others	noCNV
GRMZM2G037322	CCTGCTGCTGCTGTTGCTCCT	NA	GRMZM2G037322_T02	386	1	-0.567	NA	NA	3	216027343	216029894	+	NA	NA	NA	Catalytic/ hydrolase	AT2G18360.1////alpha/beta-Hydrolases superfamily protein	LOC_Os01g44960.1////hydrolase, alpha/beta fold family domain containing protein, expressed	1.36e-08	no	no	yes	DownOnDS	noCNV
GRMZM2G025854	ATAGAAGCTGGCTGAAAAGCTGAG	NA	GRMZM2G025854_T04	1986	0	-0.504	NA	NA	3	218346564	218354896	+	NA	NA	NA	NA	AT5G51820.1//ATPGMP,PGM,PGM1,STF1//phosphoglucomutase	LOC_Os10g11140.1////phosphoglucomutase, putative, expressed	0.335399	no	no	no	others	noCNV
GRMZM2G040905	CACCGGACTGTCCGGTGAGCCAGC	NA	GRMZM2G040905_T01	747	0	-0.489	NA	NA	3	219199499	219208610	+	NA	NA	NA	Uncharacterized protein	NA	NA	0.129195	no	no	no	others	DownCNV/PAV
GRMZM2G040905	CACCGGACTGTCCGGTGTGCCAGC	NA	GRMZM2G040905_T05	1118	1	-0.475	NA	NA	3	219199499	219208610	+	NA	NA	NA	Uncharacterized protein	NA	NA	0.129195	no	no	no	others	DownCNV/PAV
GRMZM2G040905	CAAGGCAGCTAGGAGCCGTTGAGA	NA	GRMZM2G040905_T01	1092	0	-0.605	NA	NA	3	219199499	219208610	+	NA	NA	NA	Uncharacterized protein	NA	NA	0.129195	no	no	no	others	DownCNV/PAV
GRMZM2G040905	ACCGGACTGTCCGGTGCGCCATGC	NA	GRMZM2G040905_T05	1303	1	-0.74	NA	NA	3	219199499	219208610	+	NA	NA	NA	Uncharacterized protein	NA	NA	0.129195	no	no	no	others	DownCNV/PAV
GRMZM2G463032	TTCCTTAGTTGATGCAGCAGCT	NA	GRMZM2G463032_T01	1043	1	-0.499	NA	NA	3	219772224	219780093	+	NA	NA	NA	Uncharacterized protein	AT2G26140.1//ftsh4//FTSH protease 4	LOC_Os01g39260.1////OsFtsH5 FtsH protease, homologue of AtFtsH4, expressed	0.439428	no	no	no	others	noCNV
GRMZM2G116584	ATACTTCAGTTTTGAAAACAGAGA	NA	GRMZM2G116584_T05	756	0.5	-0.52	NA	NA	3	220604800	220608677	-	cbl10	calcineurin B-like10	Zhang et al., 2016	Uncharacterized protein	AT4G33000.1//ATCBL10,CBL10,SCABP8//calcineurin B-like protein 10	LOC_Os01g39770.1////calcineurin B, putative, expressed	0.492502	no	no	no	others	noCNV
GRMZM2G058078	GATATCTCTACTACTTATTAGGGA	NA	GRMZM2G058078_T02	180	1	-0.605	NA	NA	3	223903654	223907192	+	NA	NA	NA	Uncharacterized protein	AT1G14990.1////	LOC_Os01g42120.1////expressed protein	0.256588	no	no	no	others	noCNV
GRMZM2G058078	ATATGGATTGGGGTAGAACCGAAC	NA	GRMZM2G058078_T02	586	0	-0.527	NA	NA	3	223903654	223907192	+	NA	NA	NA	Uncharacterized protein	AT1G14990.1////	LOC_Os01g42120.1////expressed protein	0.256588	no	no	no	others	noCNV
GRMZM5G819212	TTAGGCCTTGTTCGGTTACATGGG	NA	GRMZM5G819212_T02	1000	1	-0.582	NA	NA	4	824380	826918	+	NA	NA	NA	Uncharacterized protein	AT3G09310.1////	LOC_Os02g15970.2////alpha-hemolysin, putative, expressed	0.363281	no	no	no	others	noCNV
GRMZM2G172491	AACAAAATTTTCATGTGGAATTCT	NA	GRMZM2G172491_T01	272	0.5	-0.49	NA	NA	4	3051215	3054036	-	bx4	benzoxazinone synthesis4	Classical Gene from J.S	3-hydroxyindolin-2-one monooxygenase	AT3G48290.1//CYP71A24//cytochrome P450, family 71, subfamily A, polypeptide 24	LOC_Os08g01450.1////cytochrome P450, putative, expressed	0.0527576	no	no	no	others	noCNV
GRMZM2G393002	AGTGCACAGGCTGTAGCAGGCTAT	NA	GRMZM2G393002_T01	3595	0.5	-0.536	NA	NA	4	11067547	11092372	+	NA	NA	NA	Putative alpha-L-arabinofuranosidase family protein	AT3G10740.1//ARAF,ARAF1,ASD1,ATASD1//alpha-L-arabinofuranosidase 1	LOC_Os11g03730.1////alpha-N-arabinofuranosidase A, putative, expressed	0.00217068	no	no	no	others	noCNV
GRMZM2G545336	GCAGAACTGTGCACCAAAAAAGTG	NA	GRMZM2G545336_T03	1	0.5	-0.482	NA	NA	4	13118686	13122725	+	NA	NA	NA	Uncharacterized protein	AT4G16180.2////	LOC_Os03g19690.1////expressed protein	0.758994	no	no	no	others	noCNV
GRMZM2G025154	TGGTCCGGTGAAGTGTTCGGA	NA	GRMZM2G025154_T02	612	1	-0.497	NA	Gene rRNA	4	13176996	13180889	+	NA	NA	NA	Serine carboxypeptidase F13S12.6	AT5G42240.1//scpl42//serine carboxypeptidase-like 42	LOC_Os11g10750.1////OsSCP48 - Putative Serine Carboxypeptidase homologue, expressed	0.668888	no	no	no	others	noCNV
GRMZM5G840928	CATGCGCTCGTGGGCCGGCCCAGC	NA	GRMZM5G840928_T03	119	1	-0.496	NA	NA	4	14592668	14597328	-	NA	NA	NA	ATP-dependent (S)-NAD(P)H-hydrate dehydratase	AT5G19150.1////pfkB-like carbohydrate kinase family protein	LOC_Os11g17610.1////expressed protein	5.66e-13	no	no	yes	UpOnDS	noCNV
GRMZM2G045987	TGTTTGAATGCACTAGAGCTA	NA	GRMZM2G045987_T01	3032	0.5	-0.475	NA	Gene rRNA	4	17109875	17119539	+	NA	NA	NA	Uncharacterized protein	AT3G23660.1////Sec23/Sec24 protein transport family protein	LOC_Os11g24560.1////protein transport protein, putative, expressed	0.360042	no	no	no	others	noCNV
GRMZM2G149108	GTTTTCATTAATCAAGAACGA	NA	GRMZM2G149108_T02	558	1	-0.527	NA	Gene rRNA	4	17436830	17443180	-	NA	NA	NA	Ubiquitin-like 1-activating enzyme E1A%3B Uncharacterized protein	AT4G24940.1//AT-SAE1-1,ATSAE1A,SAE1A//SUMO-activating enzyme 1A	LOC_Os11g30410.1////ThiF family domain containing protein, putative, expressed	0.4705	no	no	yes	others	noCNV
GRMZM2G030862	CTCTCTATTTATAGAGGAGGGGGG	NA	GRMZM2G030862_T01	2062	0	-0.623	NA	NA	4	22163493	22169128	-	NA	NA	NA	Uncharacterized protein	AT5G23670.1//LCB2//long chain base2	LOC_Os11g31640.1////serine palmitoyltransferase 2, putative, expressed	0.0276707	no	no	no	DownOnDS	DownCNV/PAV
GRMZM2G020411	GCGATTGGGAATTAAAGCCGAGCG	NA	GRMZM2G020411_T01	802	0	-0.48	NA	NA	4	23372475	23373787	-	NA	NA	NA	Uncharacterized protein	NA	NA	0.300678	no	no	no	others	DownCNV/PAV
GRMZM2G088549	ACATGGATTGAGAGCTAACCGAAC	NA	GRMZM2G088549_T02	1682	0	-0.56	NA	NA	4	34049463	34055456	-	NA	NA	NA	Uncharacterized protein	AT5G23450.1//ATLCBK1,LCBK1//long-chain base (LCB) kinase 1	LOC_Os08g05650.1////diacylglycerol kinase, putative, expressed	0.48618	no	no	no	others	noCNV
GRMZM2G064969	CGCCGTAGCCTGTGGCGCCGAGGT	NA	GRMZM2G064969_T01	55	0.5	-0.466	NA	NA	4	38990158	38991724	+	NA	NA	NA	Uncharacterized protein	AT5G42830.1////HXXXD-type acyl-transferase family protein	LOC_Os08g01950.1////transferase family protein, putative, expressed	0.00189552	no	no	yes	others	noCNV
GRMZM2G426888	GAGATAAAATACTGTAGAAGCCGC	NA	GRMZM2G426888_T01	1924	1	-0.476	NA	NA	4	67122355	67124453	-	NA	NA	NA	Uncharacterized protein	AT1G08070.1//OTP82//Tetratricopeptide repeat (TPR)-like superfamily protein	LOC_Os06g02400.1////OsFBO18 - F-box and other domain containing protein, expressed	0.309678	no	no	no	others	noCNV
GRMZM2G059018	ACTAGTCGGTTGCCCGTGCGTTGC	NA	GRMZM2G059018_T02	291	0	-0.502	NA	NA	4	73799138	73807463	-	NA	NA	NA	Carrier protein CGI-69	AT4G27940.1//ATMTM1,MTM1//manganese tracking factor for mitochondrial SOD2	LOC_Os08g29720.1////mitochondrial carrier protein, putative, expressed	0.00168593	no	no	no	UpOnDS	noCNV
GRMZM2G015190	TGCATAGCTGTCTGAGGTCTTT	NA	GRMZM2G015190_T01	1011	1	-0.538	NA	NA	4	104065539	104069207	-	NA	NA	NA	Uncharacterized protein	AT5G22750.1//RAD5//DNA/RNA helicase protein	LOC_Os04g47830.1////SNF2 family N-terminal domain containing protein, expressed	0.123733	no	no	no	others	noCNV
GRMZM2G047763	ATACCATGCTGTTAGCCTCCGACT	NA	GRMZM2G047763_T01	1066	0	-0.568	NA	NA	4	108614973	108617119	-	NA	NA	NA	Uncharacterized protein	NA	NA	0.775595	no	no	no	others	noCNV
GRMZM2G008748	TCCTCCGGACTCCAAAACTGAT	NA	GRMZM2G008748_T03	842	0.5	-0.548	NA	NA	4	128289717	128292060	+	NA	NA	NA	60S ribosomal protein L6	AT1G74050.1////Ribosomal protein L6 family protein	LOC_Os04g39700.1////60S ribosomal protein L6, putative, expressed	0.346247	no	no	no	others	noCNV
GRMZM2G024647	ACAAGGGAATTGGAGGGGAGG	NA	GRMZM2G024647_T05	696	0.5	-0.528	NA	NA	4	128321482	128323867	-	NA	NA	NA	60S ribosomal protein L6	AT1G74050.1////Ribosomal protein L6 family protein	LOC_Os02g37862.1////60S ribosomal protein L6, putative, expressed	0.300074	no	no	no	others	noCNV
GRMZM2G019450	ATCGCTCACTTCATTGGTCGTGTT	NA	GRMZM2G019450_T04	823	0.5	-0.456	NA	NA	4	134039465	134045121	+	NA	NA	NA	Uncharacterized protein	AT3G56120.1////S-adenosyl-L-methionine-dependent methyltransferases superfamily protein	LOC_Os02g39370.1////tRNA methyltransferase, putative, expressed	0.684738	no	no	no	others	noCNV
GRMZM2G034804	GTTCGGGGATTTTCTCGGCCGGGA	NA	GRMZM2G034804_T06	732	0	-0.528	NA	NA	4	136994923	136999036	-	NA	NA	NA	Nuclear cap-binding protein subunit 2%3B Uncharacterized protein	AT5G44200.1//ATCBP20,CBP20//CAP-binding protein 20	LOC_Os02g39890.1////RNA recognition motif containing protein, putative, expressed	0.58423	no	no	no	others	noCNV
GRMZM2G157458	CGGCCGTGGCCTCTTCGGCGGC	NA	GRMZM2G157458_T01	332	1	-0.48	NA	NA	4	146170301	146171109	-	NA	NA	NA	Ferredoxin-thioredoxin reductase%2C variable chain	AT5G08410.1//FTRA2//ferredoxin/thioredoxin reductase subunit A (variable subunit) 2	LOC_Os04g44650.1////ferredoxin-thioredoxin reductase, variable chain, putative, expressed	5.03e-08	no	yes	no	others	DownCNV/PAV
GRMZM2G004180	AATCCATGTGGATTGAGCGGGATT	NA	GRMZM2G004180_T01	1462	1	-0.492	NA	NA	4	151776492	151778099	-	NA	NA	NA	Uncharacterized protein	AT4G16790.1////hydroxyproline-rich glycoprotein family protein	LOC_Os02g43900.1////expressed protein	0.00800277	no	yes	no	DownOnDS	noCNV
GRMZM2G394528	AATCCATGTGGATTGAGCGGGATT	NA	GRMZM2G394528_T01	1535	1	-0.64	NA	NA	4	155320587	155324867	-	NA	NA	NA	Uncharacterized protein	AT4G00750.1////S-adenosyl-L-methionine-dependent methyltransferases superfamily protein	LOC_Os02g45310.1////dehydration response related protein, putative, expressed	6.33e-11	no	yes	yes	DownOnDS	noCNV
GRMZM2G026024	AGATAAAATACTGTAGAAGCCGCA	NA	GRMZM2G026024_T01	2217	1	-0.483	NA	NA	4	159020429	159023347	-	NA	NA	NA	Uncharacterized protein	AT1G32060.1//PRK//phosphoribulokinase	LOC_Os02g47020.1////phosphoribulokinase/Uridine kinase family protein, expressed	0.696641	no	no	no	others	noCNV
GRMZM2G021339	CGCCATAGCCTATGGCGCCGAGGT	ZmHB115	GRMZM2G021339_T01	1801	1	-0.461	NA	NA	4	165861785	165863994	+	hb115	Homeobox-transcription factor 115	assigned by the Grassius project, (Yilmaz et al 2009)	Putative homeobox DNA-binding and leucine zipper domain family protein isoform 1%3B Putative homeobox DNA-binding and leucine zipper domain family protein isoform 2	AT3G01470.1//ATHB-1,ATHB1,HAT5,HB-1,HD-ZIP-1//homeobox 1	LOC_Os02g49700.1////homeobox associated leucine zipper, putative, expressed	0.000219136	no	yes	no	UpOnDS	noCNV
GRMZM2G099297	AATAAAAAGAAACGGAGGGAG	NA	GRMZM2G099297_T01	1527	0	-0.614	NA	NA	4	171800262	171802016	+	NA	NA	NA	Uncharacterized protein	AT4G35160.1////O-methyltransferase family protein	LOC_Os05g43940.1////O-methyltransferase, putative, expressed	4.69e-05	no	no	no	DownOnDS	noCNV
GRMZM2G010491	AATCCGGCTGCGGCTGCGGCTTCT	NA	GRMZM2G010491_T02	897	0	-0.534	NA	NA	4	174019150	174020537	+	NA	NA	NA	Thioredoxin H-type 5%3B Uncharacterized protein	AT5G39950.1//ATH2,ATTRX2,ATTRXH2,TRX2,TRXH2//thioredoxin 2	LOC_Os07g09310.1////thioredoxin, putative, expressed	0.00854885	no	yes	no	UpOnDS	noCNV
GRMZM2G018398	TAAAAGCTTCGGCAGATAAGAG	ZmEREB14	GRMZM2G018398_T01	1595	1	-0.649	NA	NA	4	176066660	176069349	+	ereb14	AP2-EREBP-transcription factor 14	assigned by the Grassius project, (Yilmaz et al 2009)	Ethylene response element binding protein%3B Putative AP2/EREBP transcription factor superfamily protein isoform 1%3B Putative AP2/EREBP transcription factor superfamily protein isoform 2%3B Uncharacterized protein	AT1G53910.1//RAP2.12//related to AP2 12	LOC_Os02g54160.1////AP2 domain containing protein, expressed	0.0244507	no	no	no	DownOnDS	noCNV
GRMZM2G097081	CCTGCTGCTGCTGTTGCTCCT	ZmEREB57	GRMZM2G097081_T01	128	0.5	-0.668	NA	NA	4	176557756	176558869	+	ereb57	AP2-EREBP-transcription factor 57	assigned by the Grassius project, (Yilmaz et al 2009)	Putative AP2/EREBP transcription factor superfamily protein	AT1G19210.1////Integrase-type DNA-binding superfamily protein	LOC_Os02g54050.1////ethylene-responsive transcription factor, putative, expressed	3.46e-05	no	no	yes	others	noCNV
GRMZM2G475683	GTATTCCGCCACCCGGCCGAAGGA	NA	GRMZM2G475683_T01	933	1	-0.501	NA	NA	4	178275310	178276595	+	NA	NA	NA	SAUR12-auxin-responsive SAUR family member	AT2G46690.1////SAUR-like auxin-responsive protein family	LOC_Os02g52990.1////OsSAUR12 - Auxin-responsive SAUR gene family member, expressed	0.0116477	no	yes	no	others	noCNV
GRMZM2G089876	TGTTTGAATGCACTAGAGCTA	NA	GRMZM2G089876_T01	815	0	-0.458	NA	Gene rRNA	4	183908823	183911258	-	NA	NA	NA	Uncharacterized protein	AT5G37055.1//ATSWC6,SEF//HIT-type Zinc finger family protein	LOC_Os03g25260.1////HIT zinc finger domain containing protein, expressed	0.145031	no	no	no	others	noCNV
GRMZM2G055538	AGTGCCCGTGCGTTGCAACGGGGA	NA	GRMZM2G055538_T02	1	0	-0.555	NA	NA	4	187471055	187477306	-	NA	NA	NA	Myosin-like protein%3B Uncharacterized protein	AT1G55170.1////	LOC_Os08g33330.1////protein kinase PKN/PRK1, effector, putative, expressed	6.24e-05	no	no	no	UpOnDS	noCNV
GRMZM2G058120	ATTGCACCCGGAATCGTTCCAGCT	NA	GRMZM2G058120_T01	1687	1	-0.472	NA	NA	4	193403719	193406093	+	NA	NA	NA	Uncharacterized protein	AT5G19980.1//GONST4//golgi nucleotide sugar transporter 4	LOC_Os08g10350.1////integral membrane family protein, putative, expressed	0.0224608	no	no	no	UpOnDS	noCNV
GRMZM2G016997	TGTTTGAATGCACTAGAGCTA	NA	GRMZM2G016997_T01	3426	0.5	-0.844	NA	Gene rRNA	4	193514728	193523266	-	NA	NA	NA	Uncharacterized protein	AT3G12280.2//ATRBR1,RB,RB1,RBR,RBR1//retinoblastoma-related 1	LOC_Os08g42600.1////retinoblastoma-related protein-like, putative, expressed	0.492502	no	no	no	others	noCNV
GRMZM2G034947	CCCCGCGGGGAATCGGGGATCGGG	NA	GRMZM2G034947_T02	1621	0	-0.724	NA	NA	4	199031223	199033282	+	NA	NA	NA	Uncharacterized protein	NA	LOC_Os09g14170.1////expressed protein	3.68e-05	no	no	no	UpOnDS	DownCNV/PAV
GRMZM2G034947	CCCGTCCCCGTTTACCCGTCGGGG	NA	GRMZM2G034947_T02	1716	1	-0.708	NA	NA	4	199031223	199033282	+	NA	NA	NA	Uncharacterized protein	NA	LOC_Os09g14170.1////expressed protein	3.68e-05	no	no	no	UpOnDS	DownCNV/PAV
GRMZM2G034947	GAATTCCCCGCGGGGAATCGGGGA	NA	GRMZM2G034947_T03	1050	0	-0.706	NA	NA	4	199031223	199033282	+	NA	NA	NA	Uncharacterized protein	NA	LOC_Os09g14170.1////expressed protein	3.68e-05	no	no	no	UpOnDS	DownCNV/PAV
GRMZM2G034947	CCCCGCGGGGAACGGGGATGGGGA	NA	GRMZM2G034947_T02	1753	0.5	-0.726	NA	NA	4	199031223	199033282	+	NA	NA	NA	Uncharacterized protein	NA	LOC_Os09g14170.1////expressed protein	3.68e-05	no	no	no	UpOnDS	DownCNV/PAV
GRMZM2G034947	CCATCCCCATCCCCTAATGGAGGA	NA	GRMZM2G034947_T02	1648	0	-0.684	NA	NA	4	199031223	199033282	+	NA	NA	NA	Uncharacterized protein	NA	LOC_Os09g14170.1////expressed protein	3.68e-05	no	no	no	UpOnDS	DownCNV/PAV
GRMZM2G034947	ATATCCCCGCGGGGGAAGTTTCTT	NA	GRMZM2G034947_T03	1098	0	-0.602	NA	NA	4	199031223	199033282	+	NA	NA	NA	Uncharacterized protein	NA	LOC_Os09g14170.1////expressed protein	3.68e-05	no	no	no	UpOnDS	DownCNV/PAV
GRMZM2G034947	CCATCCCCATCCCCTAATAGAGGA	NA	GRMZM2G034947_T03	1072	1	-0.559	NA	NA	4	199031223	199033282	+	NA	NA	NA	Uncharacterized protein	NA	LOC_Os09g14170.1////expressed protein	3.68e-05	no	no	no	UpOnDS	DownCNV/PAV
GRMZM2G460544	TTGACAGAAGAGAGTGAGCAC	ZmSBP30	GRMZM2G460544_T01	1138	1	-0.656	zma-MIR156b,zma-MIR156d	Gene miRNA	4	199456664	199460958	-	ub3	unbranched3	assigned by the Grassius project, (Yilmaz et al 2009), from: AJ011620, and Chuck et al., 2014	Squamosa promoter-binding protein-like (SBP domain) transcription factor family protein%3B Uncharacterized protein	AT2G42200.1//SPL9//squamosa promoter binding protein-like 9	LOC_Os08g39890.1////OsSPL14 - SBP-box gene family member, expressed	0.414126	no	no	no	others	noCNV
GRMZM2G109071	GATTCTATTTCGTGCTAGTTAGGC	NA	GRMZM2G109071_T03	997	1	-0.458	NA	NA	4	210307097	210314439	+	NA	NA	NA	Uncharacterized protein	AT1G14700.1//ATPAP3,PAP3//purple acid phosphatase 3	LOC_Os11g34720.1////Ser/Thr protein phosphatase family protein, putative, expressed	2.59e-18	no	no	yes	DownOnDS	noCNV
GRMZM2G702806	AGGCTGTCGGGCCGCGACACACGC	NA	GRMZM2G702806_T01	1762	0.5	-0.468	NA	NA	4	212574291	212576374	-	NA	NA	NA	Uncharacterized protein	AT3G63290.1////2-oxoglutarate (2OG) and Fe(II)-dependent oxygenase superfamily protein	LOC_Os10g14180.1////expressed protein	0.177987	no	no	no	others	noCNV
GRMZM2G076896	CGGGCTCGCTTGGTGCAGATC	ZmEREB111	GRMZM2G076896_T01	1074	1	-0.508	zma-MIR168b,zma-MIR168a	Gene miRNA	4	215636055	215638692	+	ereb111	AP2-EREBP-transcription factor 111	assigned by the Grassius project, (Yilmaz et al 2009)	Putative AP2/EREBP transcription factor superfamily protein	AT5G61890.1////Integrase-type DNA-binding superfamily protein	LOC_Os04g32620.1////ethylene-responsive transcription factor ERF114, putative, expressed	0.0389891	no	no	no	UpOnDS	noCNV
GRMZM2G066222	ATTTGTCAGCCGAAGATTAAAAGA	NA	GRMZM2G066222_T01	822	1	-0.674	NA	NA	4	218054500	218057037	+	rps27	ribosomal protein S27	0	Uncharacterized protein	AT3G61110.1//ARS27A,RS27A//ribosomal protein S27	LOC_Os04g27860.1////40S ribosomal protein S27, putative, expressed	0.705996	no	no	yes	others	noCNV
GRMZM2G461808	CCCATCTGGGCTGGGGCACGCGGC	NA	GRMZM2G461808_T01	1378	1	-0.488	NA	NA	4	220014009	220027025	-	NA	NA	NA	Uncharacterized protein	AT1G28410.1////	LOC_Os02g20270.1////expressed protein	0.219416	no	no	no	others	noCNV
GRMZM2G461808	CCCATCTGGGCTGGGACACGCAGC	NA	GRMZM2G461808_T02	1250	0.5	-0.546	NA	Gene miRNA	4	220014009	220027025	-	NA	NA	NA	Uncharacterized protein	AT1G28410.1////	LOC_Os02g20270.1////expressed protein	0.219416	no	no	no	others	noCNV
GRMZM2G025477	ATATCGCGTTGCTAGCTTCGTCTT	NA	GRMZM2G025477_T01	1246	0.5	-0.46	NA	NA	4	221299923	221301965	+	NA	NA	NA	NA	NA	NA	NA	NA	NA	NA	NA	NA
GRMZM2G043056	AATCCGGCTGCGGCTGCGGCTTCT	NA	GRMZM2G043056_T02	54	0	-0.618	NA	NA	4	231769958	231776855	-	NA	NA	NA	Putative ARF GTPase-activating domain family protein isoform 1%3B Putative ARF GTPase-activating domain family protein isoform 2	AT4G13350.1//NIG//NSP (nuclear shuttle protein)-interacting GTPase	LOC_Os02g11820.2////GTPase-activating protein, putative, expressed	0.000207438	no	no	yes	UpOnDS	noCNV
GRMZM2G336875	GTTGCAACGCACGGGCACTTACCT	NA	GRMZM2G336875_T01	1061	0	-0.574	NA	NA	4	232843893	232846622	+	rps8	ribosomal protein S8 homolog	from: M95064	40S ribosomal protein S8	AT5G59240.1////Ribosomal protein S8e family protein	LOC_Os04g28180.1////ribosomal protein, putative, expressed	0.0029684	no	no	no	DownOnDS	noCNV
GRMZM2G450937	ACTTTGTCTAACTTTTCTGTC	NA	GRMZM2G450937_T01	1397	0.5	-0.453	NA	NA	4	237851280	237857810	+	NA	NA	NA	Uncharacterized protein	AT1G02780.1//emb2386//Ribosomal protein L19e family protein	LOC_Os03g38260.1////60S ribosomal protein L19-3, putative, expressed	0.604692	no	no	no	others	noCNV
GRMZM2G174669	AAACTTTGATTAGCTGGAACGATT	NA	GRMZM2G174669_T02	1563	0.5	-0.486	NA	NA	4	238915280	238920810	-	NA	NA	NA	Uncharacterized protein	AT1G01860.1//PFC1//Ribosomal RNA adenine dimethylase family protein	LOC_Os02g03050.1////dimethyladenosine transferase, putative, expressed	0.841536	no	no	no	others	DownCNV/PAV
GRMZM2G153999	AATCCGGCTGCGGCTGCGGCTTCT	NA	GRMZM2G153999_T02	2449	0	-0.539	NA	NA	4	239769029	239772527	-	NA	NA	NA	Uncharacterized protein	AT5G05240.1////Uncharacterised conserved protein (UCP030365)	LOC_Os02g03940.1////expressed protein	0.0208674	no	no	yes	UpOnDS	noCNV
GRMZM2G073731	AAGCCAGAATTCTGATCCTC	NA	GRMZM2G073731_T01	819	1	-0.689	NA	Gene snRNA snoRNA	4	239962037	239964187	+	NA	NA	NA	Uncharacterized protein	NA	NA	0.486277	no	no	no	others	noCNV
GRMZM2G073731	TGGGCCTGATGCCACGTCTCTGT	NA	GRMZM2G073731_T01	1507	0	-0.556	NA	Gene snRNA snoRNA	4	239962037	239964187	+	NA	NA	NA	Uncharacterized protein	NA	NA	0.486277	no	no	no	others	noCNV
GRMZM2G073731	TTAAGCCAGATGTTCTGATCGA	NA	GRMZM2G073731_T01	1016	0	-0.684	NA	Gene snRNA snoRNA	4	239962037	239964187	+	NA	NA	NA	Uncharacterized protein	NA	NA	0.486277	no	no	no	others	noCNV
GRMZM2G054378	TACTTCAGACATTTGGAACCAT	NA	GRMZM2G054378_T02	3025	1	-0.504	NA	others	5	10731	23527	-	NA	NA	NA	Uncharacterized protein	AT5G17660.1////tRNA (guanine-N-7) methyltransferase	LOC_Os01g35170.1////tRNA methyltransferase, putative, expressed	0.070695	no	no	no	others	DownCNV/PAV
GRMZM2G054678	CGGGCCGCCGGCTGTCGGCAGAGG	NA	GRMZM2G054678_T02	69	1	-0.681	NA	NA	5	38103	51860	-	NA	NA	NA	NA	AT4G15880.1//ATESD4,ESD4//Cysteine proteinases superfamily protein	LOC_Os04g54680.1////ulp1 protease family protein, putative, expressed	0.000179307	no	no	no	UpOnDS	noCNV
GRMZM2G030858	GACGAGGAGCTCGGCAAGCTGC	NA	GRMZM2G030858_T01	1554	0	-0.555	NA	NA	5	938233	948768	-	NA	NA	NA	NA	AT5G50970.1////transducin family protein / WD-40 repeat family protein	NA	0.899123	no	no	no	others	noCNV
GRMZM2G099449	GACGGCTGGCCCTGGGCCGTCGGA	NA	GRMZM2G099449_T01	94	1	-0.569	NA	NA	5	4309356	4312212	+	NA	NA	NA	Transmembrane BAX inhibitor motif-containing protein 4%3B Uncharacterized protein	AT3G63310.1//BIL4//Bax inhibitor-1 family protein	LOC_Os03g58150.1////transmembrane BAX inhibitor motif-containing protein, putative, expressed	0.97003	no	no	no	others	noCNV
GRMZM2G099449	TGAGAAGATGATGGACTAGCTCAT	NA	GRMZM2G099449_T01	958	1	-0.456	NA	NA	5	4309356	4312212	+	NA	NA	NA	Transmembrane BAX inhibitor motif-containing protein 4%3B Uncharacterized protein	AT3G63310.1//BIL4//Bax inhibitor-1 family protein	LOC_Os03g58150.1////transmembrane BAX inhibitor motif-containing protein, putative, expressed	0.97003	no	no	no	others	noCNV
GRMZM2G130678	TTTTCTTTTCTTTTTCATGGC	NA	GRMZM2G130678_T02	28	1	-0.477	NA	others	5	5246397	5249772	+	NA	NA	NA	Actin-depolymerizing factor 6%3B Uncharacterized protein	AT2G31200.1//ADF6,ATADF6//actin depolymerizing factor 6	LOC_Os03g56790.1////actin-depolymerizing factor, putative, expressed	1.23e-05	no	no	no	DownOnDS	noCNV
GRMZM2G386273	AAAAACTGTGGTTTTCAAAAACTT	ZmbZIP55	GRMZM2G386273_T01	766	0.5	-0.553	NA	NA	5	5632236	5633262	-	bzip55	bZIP-transcription factor 55	assigned by the Grassius project, (Yilmaz et al 2009)	Ocs element-binding factor 1	NA	LOC_Os03g56010.1////bZIP transcription factor domain containing protein, expressed	0.0156009	no	no	no	others	noCNV
GRMZM2G386273	ATAAACTACGGTATTGTCATAACT	ZmbZIP55	GRMZM2G386273_T01	810	0	-0.505	NA	NA	5	5632236	5633262	-	bzip55	bZIP-transcription factor 55	assigned by the Grassius project, (Yilmaz et al 2009)	Ocs element-binding factor 1	NA	LOC_Os03g56010.1////bZIP transcription factor domain containing protein, expressed	0.0156009	no	no	no	others	noCNV
GRMZM2G051270	TGAAGTGTTTGGGGGAACTC	NA	GRMZM2G051270_T02	145	1	-0.604	zma-MIR395p,zma-MIR395o,zma-MIR395n,zma-MIR395j,zma-MIR395i,zma-MIR395h,zma-MIR395g,zma-MIR395f,zma-MIR395e,zma-MIR395d,zma-MIR395a,zma-MIR395b	Gene miRNA	5	7710238	7714213	+	NA	NA	NA	Uncharacterized protein	AT3G22890.1//APS1//ATP sulfurylase 1	LOC_Os03g53230.1////bifunctional 3-phosphoadenosine 5-phosphosulfate synthetase, putative, expressed	0.00707183	no	no	no	UpOnDS	noCNV
GRMZM2G100380	AGGGAGGCGGAGGGTGAGAGGA	NA	GRMZM2G100380_T01	893	1	-0.541	NA	NA	5	8360460	8362680	+	NA	NA	NA	NA	AT1G03670.1////ankyrin repeat family protein	LOC_Os07g09530.1////ankyrin repeat family protein, putative, expressed	0.191604	no	no	no	others	noCNV
GRMZM2G457881	TCCCGCACTGTGCGGGGTCTGGGG	NA	GRMZM2G457881_T02	1083	0	-0.509	NA	NA	5	11957842	11966150	+	sdg130	set domain gene130	0	Uncharacterized protein	AT2G17900.1//SDG37//SET domain group 37	LOC_Os03g49730.1////zinc finger protein, putative, expressed	0.492374	no	no	no	others	noCNV
GRMZM2G102616	AATCCATATGGATTGGAGGGGATT	NA	GRMZM2G102616_T01	458	0	-0.528	NA	NA	5	12237483	12238175	-	NA	NA	NA	Putative uncharacterized protein	NA	NA	0.266279	no	no	no	others	noCNV
GRMZM2G033612	TCCACAGGCTTTCTTGAACTG	ZmOrphan160	GRMZM2G033612_T02	633	0	-0.646	zma-MIR396d,zma-MIR396c	Gene miRNA	5	13818620	13821440	-	NA	NA	NA	Uncharacterized protein	AT3G13960.1//AtGRF5,GRF5//growth-regulating factor 5	LOC_Os03g47140.1////growth regulating factor protein, putative, expressed	0.106092	no	no	no	others	noCNV
GRMZM2G165488	CAGCCAAGGATGACTTGCCGG	ZmCA2P10	GRMZM2G165488_T03	1357	1.5	-0.56	zma-MIR169r,zma-MIR169c	Gene miRNA	5	16480475	16484858	+	ca2p10	CCAAT-HAP2-transcription factor 210	assigned by the Grassius project, (Yilmaz et al 2009)	Uncharacterized protein	AT5G06510.1//NF-YA10//nuclear factor Y, subunit A10	LOC_Os03g44540.1////nuclear transcription factor Y subunit, putative, expressed	0.380433	no	no	no	others	DownCNV/PAV
GRMZM5G851862	CGAGCCCGGGCGGAGCGGCCGTCGG	NA	GRMZM5G851862_T01	246	1	-0.588	NA	NA	5	21362871	21365812	+	NA	NA	NA	Uncharacterized protein	AT2G45570.1//CYP76C2//cytochrome P450, family 76, subfamily C, polypeptide 2	LOC_Os10g08319.1////cytochrome P450, putative, expressed	0.925078	no	no	no	others	noCNV
GRMZM2G059013	AAGCATTAGGTCGTTTCTGAGACC	NA	GRMZM2G059013_T02	3471	0.5	-0.523	NA	NA	5	22010376	22020033	+	NA	NA	NA	NA	AT1G33250.1////Protein of unknown function (DUF604)	LOC_Os10g37260.1////fringe-related protein, putative, expressed	0.00169027	no	no	no	UpOnDS	noCNV
GRMZM2G059013	TGCCTGCCTCTTCCATTCCTTC	NA	GRMZM2G059013_T02	4835	0.5	-0.489	NA	NA	5	22010376	22020033	+	NA	NA	NA	NA	AT1G33250.1////Protein of unknown function (DUF604)	LOC_Os10g37260.1////fringe-related protein, putative, expressed	0.00169027	no	no	no	UpOnDS	noCNV
GRMZM2G002859	TGTTTGAATGCACTAGAGCTA	NA	GRMZM2G002859_T01	70	1	-0.739	NA	Gene rRNA	5	22619892	22625492	+	NA	NA	NA	Uncharacterized protein	AT4G34660.1////SH3 domain-containing protein	LOC_Os10g36870.1////src homology-3 domain protein 3, putative, expressed	1.25e-05	no	no	no	DownOnDS	noCNV
GRMZM2G060349	CGACGGCTGTCACAACTGCGGC	NA	GRMZM2G060349_T01	1599	0.5	-0.566	NA	NA	5	23357125	23387136	-	NA	NA	NA	Uncharacterized protein	AT5G54090.1////DNA mismatch repair protein MutS, type 2	LOC_Os10g36530.1////mutS domain V family protein, expressed	0.422373	no	no	no	others	noCNV
GRMZM2G020098	TAAGGGCTAGTTTGGGAACCCCAA	NA	GRMZM2G020098_T01	1843	1	-0.594	NA	NA	5	25635573	25639964	-	NA	NA	NA	Uncharacterized protein	AT1G03610.1////Protein of unknown function (DUF789)	LOC_Os10g35150.1////expressed protein	0.242456	no	no	no	others	noCNV
GRMZM2G477694	CACGTCGGGGACGGCTGACGGA	NA	GRMZM2G477694_T02	12	1	-0.558	NA	NA	5	26998356	27013206	-	NA	NA	NA	Uncharacterized protein	AT3G19840.1//ATPRP40C,PRP40C//pre-mRNA-processing protein 40C	NA	3.95e-07	no	no	yes	UpOnDS	noCNV
GRMZM2G158179	CTGGCTCCCGCTGCCCGCAGGC	NA	GRMZM2G158179_T01	396	1	-0.523	NA	NA	5	29291002	29299432	+	NA	NA	NA	Uncharacterized protein	AT3G49660.1////Transducin/WD40 repeat-like superfamily protein	LOC_Os05g23430.2////WD domain, G-beta repeat domain containing protein, expressed	0.0594853	no	no	no	others	noCNV
GRMZM2G075051	AGGGCTAGTTTGGAAACTCAAATC	NA	GRMZM2G075051_T01	1685	0.5	-0.642	NA	NA	5	31282654	31289863	+	NA	NA	NA	Ras-related protein Rab-18%3B Uncharacterized protein	AT5G03530.1//ATRAB,ATRAB ALPHA,ATRAB18B,ATRABC2A,RABC2A//RAB GTPase homolog C2A	LOC_Os10g31830.1////ras-related protein, putative, expressed	0.00020067	no	no	no	UpOnDS	noCNV
GRMZM2G081504	ACGTAGTCTATTAATAAATACAGA	NA	GRMZM2G081504_T01	2991	1	-0.58	NA	NA	5	33910047	33920991	-	NA	NA	NA	Uncharacterized protein	AT4G14570.1////acylaminoacyl-peptidase-related	LOC_Os10g28030.1////OsPOP22 - Putative Prolyl Oligopeptidase homologue, expressed	0.376237	no	no	no	others	noCNV
GRMZM5G882378	CCCGCTCTCGCCTCCTGCTGGGC	NA	GRMZM5G882378_T03	1572	0.5	-0.501	NA	NA	5	46972995	46976358	+	NA	NA	NA	40S ribosomal protein S14	AT3G11510.1////Ribosomal protein S11 family protein	LOC_Os02g06700.2////ribosomal protein, putative, expressed	0.452168	no	no	no	others	noCNV
GRMZM2G115914	GCCGCCCCCGGCGTCGCGA	NA	GRMZM2G115914_T01	316	1	-0.567	NA	Gene rRNA	5	52916716	52928022	-	NA	NA	NA	NA	AT5G57360.1//ADO1,FKL2,LKP1,ZTL//Galactose oxidase/kelch repeat superfamily protein	LOC_Os06g47890.1////OsFBO9 - F-box and other domain containing protein, expressed	0.961149	no	no	no	others	noCNV
GRMZM2G116243	ATGTACTATATGAATAAATCCGTA	NA	GRMZM2G116243_T04	77	1	-0.61	NA	NA	5	60026465	60031511	+	cl439_1b	0	0	Uncharacterized protein	AT2G45670.1////calcineurin B subunit-related	LOC_Os06g49790.1////acyltransferase, putative, expressed	0.0218351	no	no	no	UpOnDS	noCNV
GRMZM2G359333	GTTTGGGTACTCTAGTATTGACCT	NA	GRMZM2G359333_T01	3315	1	-0.614	NA	NA	5	64276471	64282115	+	NA	NA	NA	NA	AT5G03780.1//TRFL10//TRF-like 10	LOC_Os11g29240.1////expressed protein	0.115405	no	no	no	others	noCNV
GRMZM2G120578	ACCTCAACTCATGTGTATTGG	NA	GRMZM2G120578_T02	1550	1	-0.596	NA	NA	5	70714197	70720379	-	NA	NA	NA	Spermidine synthase 1%3B Uncharacterized protein	AT5G53120.1//ATSPDS3,SPDS3,SPMS//spermidine synthase 3	LOC_Os02g15550.2////spermidine synthase, putative, expressed	0.0961591	no	no	no	others	noCNV
GRMZM2G477236	AATCTATAGCAAGTCAAAATCGTT	NA	GRMZM2G477236_T03	2904	1	-0.496	NA	NA	5	73153963	73163324	+	NA	NA	NA	Lil3 protein%3B Uncharacterized protein	AT1G22650.1////Plant neutral invertase family protein	LOC_Os02g03320.1////plant neutral invertase domain containing protein, expressed	0.432147	no	no	yes	others	noCNV
GRMZM2G049779	AGGGCTAGTTTGGAAACTCAAATC	NA	GRMZM2G049779_T01	414	0.5	-0.532	NA	NA	5	74362395	74362907	-	NA	NA	NA	NA	NA	NA	0.66581	no	no	no	others	noCNV
GRMZM2G484344	ATTATATACATAATGGTGTTTGGC	NA	GRMZM2G484344_T01	1884	0	-0.629	NA	NA	5	77282513	77285845	+	NA	NA	NA	Uncharacterized protein	AT5G10910.1////mraW methylase family protein	LOC_Os02g04500.1////S-adenosyl-L-methionine-dependent methyltransferase mraW, putative, expressed	0.691628	no	no	no	others	noCNV
GRMZM2G484344	AGTTTTTCTGCAGTTTTGGAAGA	NA	GRMZM2G484344_T01	1936	0	-0.507	NA	NA	5	77282513	77285845	+	NA	NA	NA	Uncharacterized protein	AT5G10910.1////mraW methylase family protein	LOC_Os02g04500.1////S-adenosyl-L-methionine-dependent methyltransferase mraW, putative, expressed	0.691628	no	no	no	others	noCNV
GRMZM2G305096	ATTTTTGGGCAGTCTTTGATGT	NA	GRMZM2G305096_T01	322	0.5	-0.451	NA	NA	5	113098448	113101043	+	NA	NA	NA	NA	NA	LOC_Os01g12890.1////expressed protein	0.520456	no	no	no	others	DownCNV/PAV
GRMZM2G418206	AGACCAGCTCAGAATTGAAGAA	NA	GRMZM2G418206_T01	2351	1	-0.774	NA	NA	5	135221284	135236032	+	NA	NA	NA	NA	AT2G32230.1//PRORP1//proteinaceous RNase P 1	LOC_Os02g17360.2////PPR repeat domain containing protein, putative, expressed	0.285997	no	no	yes	others	noCNV
GRMZM2G419455	AGATACGATTGGTGAGTTGAGCGA	NA	GRMZM2G419455_T01	861	0.5	-0.553	NA	NA	5	142047353	142049608	+	NA	NA	NA	NA	NA	NA	0.221521	no	no	no	others	DownCNV/PAV
GRMZM2G021106	AGAACGATCATCAATTGGTGGC	NA	GRMZM2G021106_T01	943	1	-0.502	NA	NA	5	152605126	152606848	-	NA	NA	NA	Uncharacterized protein	AT1G17710.1////Pyridoxal phosphate phosphatase-related protein	LOC_Os02g13290.1////phosphoethanolamine/phosphocholine phosphatase, putative, expressed	0.00174035	no	no	no	DownOnDS	noCNV
GRMZM2G062499	CTGTGTCTATGATTTGTGGGTCCG	NA	GRMZM2G062499_T02	483	1	-0.583	NA	NA	5	161231808	161235997	-	NA	NA	NA	Spotted leaf protein 11	AT3G07360.1//ATPUB9,PUB9//plant U-box 9	LOC_Os02g28720.1////spotted leaf 11, putative, expressed	0.0845208	no	no	no	others	noCNV
GRMZM2G179802	AATCCGGCTGCGGCTGCGGCTTCT	ZmHSF29	GRMZM2G179802_T02	104	0	-0.562	NA	NA	5	162047215	162053475	-	hsftf29	HSF-transcription factor 29	assigned by the Grassius project, (Yilmaz et al 2009)	Heat shock transcription factor like protein%3B Uncharacterized protein	AT1G46264.1//AT-HSFB4,HSFB4,SCZ//heat shock transcription factor B4	LOC_Os02g29340.1////HSF-type DNA-binding domain containing protein, expressed	0.237036	no	no	no	others	noCNV
GRMZM2G337749	GGCGTGATCCCAAAAAATTAAGGA	NA	GRMZM2G337749_T01	1236	0	-0.477	NA	NA	5	173435057	173440344	-	ddt3	DDT-transcription factor 3	assigned by the Grassius project, (Yilmaz et al 2009)	NA	AT5G08630.1////DDT domain-containing protein	LOC_Os02g35100.1////DDT domain containing protein, putative, expressed	0.00898225	no	no	yes	UpOnDS	noCNV
GRMZM2G176382	GGCTCCTGCTGGTCCGCCGA	NA	GRMZM2G176382_T01	1441	1	-0.466	NA	NA	5	177876223	177883339	+	NA	NA	NA	Uncharacterized protein	NA	LOC_Os02g37020.1////expressed protein	0.909028	no	no	no	others	noCNV
GRMZM2G179294	TTAAGTTGTTATTTGGTGACGA	NA	GRMZM2G179294_T01	913	1	-0.523	NA	NA	5	180782642	180783869	-	NA	NA	NA	High affinity nitrate transporter	AT5G50200.1//ATNRT3.1,NRT3.1,WR3//nitrate transmembrane transporters	LOC_Os02g38230.1////high affinity nitrate transporter, putative, expressed	0.0489296	no	no	no	others	noCNV
GRMZM5G834874	CCCAGCCCGAAGGTCGTTTGATGT	ZmABI35	GRMZM5G834874_T02	2353	0	-0.589	NA	NA	5	181252639	181256424	-	abi35	ABI3-VP1-transcription factor 35	assigned by the Grassius project, (Yilmaz et al 2009)	NA	AT3G18960.1////AP2/B3-like transcriptional factor family protein	LOC_Os02g38470.1////B3 DNA binding domain containing protein, expressed	0.0589638	no	no	no	others	noCNV
GRMZM2G095147	AGTGAGGAGTGAGAAGATGATGGA	NA	GRMZM2G095147_T02	1293	0.5	-0.46	NA	NA	5	182505277	182511959	-	NA	NA	NA	Uncharacterized protein	AT2G43630.1////	LOC_Os02g39340.1////glycine-rich protein, putative, expressed	0.385648	no	no	no	others	noCNV
GRMZM2G028096	AGATGAGCCAAAGCCATTCTGA	NA	GRMZM2G028096_T01	1455	0.5	-0.654	NA	NA	5	182584712	182592899	-	NA	NA	NA	Uncharacterized protein	AT3G03340.1//UNE6//LUC7 related protein	LOC_Os02g39300.1////RNA-binding protein Luc7-like, putative, expressed	0.00423409	no	no	no	UpOnDS	noCNV
GRMZM2G026839	TTTCTTCAATTCTGAGCTGGTC	NA	GRMZM2G026839_T01	188	1	-0.454	NA	NA	5	184492164	184496801	-	NA	NA	NA	Putative uncharacterized protein	AT4G28760.1////Protein of unknown function (DUF3741)	LOC_Os02g40410.1////expressed protein	0.85471	no	no	no	others	noCNV
GRMZM2G165290	ATAGCTTCTTCTGGCTTTCACT	NA	GRMZM2G165290_T01	858	1	-0.461	NA	NA	5	187519222	187521068	+	NA	NA	NA	Membrane-associated salt-inducible protein like%3B Uncharacterized protein	AT2G18520.1////Tetratricopeptide repeat (TPR)-like superfamily protein	LOC_Os02g42210.1////membrane-associated salt-inducible protein like, putative, expressed	0.68918	no	no	no	others	noCNV
GRMZM2G178517	ATAACCGAACAAACCCTTAGGG	NA	GRMZM2G178517_T09	1696	1	-0.476	NA	NA	5	188512723	188518155	-	nit1	nitrilase1	B73_v2 alignment to sequence accession AY156979	Nitrilase 1%3B Nitrilase 4%3B Uncharacterized protein	AT5G22300.1//AtNIT4,NIT4//nitrilase 4	LOC_Os02g42330.1////nitrilase, putative, expressed	0.0589726	no	no	no	others	noCNV
GRMZM2G166976	TTAGATGACCATCAGCAAACA	NA	GRMZM2G166976_T01	580	1	-0.497	zma-MIR827	NA	5	196079252	196085120	+	NA	NA	NA	Uncharacterized protein	AT1G63010.2////Major Facilitator Superfamily with SPX (SYG1/Pho81/XPR1) domain-containing protein	LOC_Os02g45520.1////uncharacterized membrane protein, putative, expressed	0.136897	no	no	no	others	noCNV
GRMZM2G034876	TCCACAGGCTTTCTTGAACTG	ZmGRF6	GRMZM2G034876_T03	662	0	-0.473	zma-MIR396d,zma-MIR396c	Gene miRNA	5	200344613	200348143	-	grftf6	GRF-transcription factor 6	assigned by the Grassius project, (Yilmaz et al 2009)	Uncharacterized protein	AT3G13960.1//AtGRF5,GRF5//growth-regulating factor 5	LOC_Os02g47280.2////growth-regulating factor, putative, expressed	0.32208	no	no	yes	others	noCNV
GRMZM2G046244	GCGGCGCGACCGTCTTGGTGGA	NA	GRMZM2G046244_T01	254	0.5	-0.498	NA	NA	5	200931643	200935048	+	NA	NA	NA	Cation cation antiporter	AT3G55600.1////Membrane fusion protein Use1	LOC_Os08g42110.1////expressed protein	4.02e-05	no	no	no	UpOnDS	noCNV
GRMZM2G147377	ATTTTAGAGGAATTGGAATTCACT	NA	GRMZM2G147377_T02	2863	0.5	-0.454	NA	NA	5	201523340	201527450	-	NA	NA	NA	Kinesin light chain	AT3G27960.1////Tetratricopeptide repeat (TPR)-like superfamily protein	LOC_Os02g47880.1////tetratricopeptide repeat domain containing protein, expressed	0.0106317	no	no	no	DownOnDS	noCNV
GRMZM2G123371	TTCCTCATGTTAGTACTAACT	NA	GRMZM2G123371_T01	2905	0.5	-0.817	NA	NA	5	202621246	202628418	-	NA	NA	NA	Uncharacterized protein	AT1G76550.1////Phosphofructokinase family protein	LOC_Os02g48360.1////pyrophosphate--fructose 6-phosphate 1-phosphotransferase subunit alpha, putative, expressed	1.62e-05	no	yes	no	DownOnDS	noCNV
GRMZM2G045404	TATCTAGAAAAGTCAAAATGT	NA	GRMZM2G045404_T02	1388	1	-0.51	NA	NA	5	203708066	203711760	+	NA	NA	NA	Uncharacterized protein	AT2G04550.1//DSPTP1E,IBR5//indole-3-butyric acid response 5	LOC_Os02g48840.1////dual specificity protein phosphatase, putative, expressed	4.96e-05	no	no	yes	UpOnDS	noCNV
GRMZM2G042027	TCCAGACGTAACCGAACAAGC	NA	GRMZM2G042027_T04	52	0.5	-0.569	NA	NA	5	204666453	204683080	+	NA	NA	NA	Uncharacterized protein	AT4G39460.1//SAMC1,SAMT1//S-adenosylmethionine carrier 1	LOC_Os05g29860.1////mitochondrial carrier protein, putative, expressed	0.775461	no	no	no	others	noCNV
GRMZM2G042438	TGTGTGCCCGTGCGTTGCAACGGA	NA	GRMZM2G042438_T01	815	0.5	-0.604	NA	NA	5	204685663	204688072	-	NA	NA	NA	NA	NA	NA	9.52e-05	no	no	no	UpOnDS	noCNV
GRMZM2G140150	CCAATACACATGGATTGGATGGGA	NA	GRMZM2G140150_T01	1470	0.5	-0.631	NA	NA	5	205833927	205838509	-	NA	NA	NA	Pyruvate dehydrogenase E1 component alpha subunit	AT1G59900.1//AT-E1 ALPHA,E1 ALPHA//pyruvate dehydrogenase complex E1 alpha subunit	LOC_Os02g50620.1////dehydrogenase E1 component domain containing protein, expressed	1.2e-13	no	no	no	DownOnDS	noCNV
GRMZM2G055204	AGACATGTATCTTGACGAAGACAC	ZmEREB18	GRMZM2G055204_T01	129	0.5	-0.51	NA	NA	5	208210507	208213447	+	ereb18	AP2-EREBP-transcription factor 18	assigned by the Grassius project, (Yilmaz et al 2009)	AP2 domain-containing protein	AT1G78080.1//RAP2.4//related to AP2 4	LOC_Os02g51670.1////ethylene-responsive transcription factor, putative, expressed	0.168576	no	yes	no	others	DownCNV/PAV
GRMZM2G055204	ACAGTGTCTTAGCTCTATGTTCGA	ZmEREB18	GRMZM2G055204_T01	107	1	-0.487	NA	NA	5	208210507	208213447	+	ereb18	AP2-EREBP-transcription factor 18	assigned by the Grassius project, (Yilmaz et al 2009)	AP2 domain-containing protein	AT1G78080.1//RAP2.4//related to AP2 4	LOC_Os02g51670.1////ethylene-responsive transcription factor, putative, expressed	0.168576	no	yes	no	others	DownCNV/PAV
GRMZM2G101271	GTTTTTTATGAATCGTTGTGTA	NA	GRMZM2G101271_T03	1204	1	-0.551	NA	NA	5	209727724	209731835	+	NA	NA	NA	NA	AT3G19170.1//ATPREP1,ATZNMP,PREP1//presequence protease 1	LOC_Os02g52390.1////M16 domain containing zinc peptidase, putative, expressed	0.748095	no	no	no	others	noCNV
GRMZM2G124460	GTTTGGGTACTCTAGTATTGACCT	NA	GRMZM2G124460_T01	1805	0	-0.53	NA	NA	5	212227941	212248198	-	NA	NA	NA	Uncharacterized protein	AT3G54190.1////Transducin/WD40 repeat-like superfamily protein	LOC_Os02g54090.1////expressed protein	0.0221297	no	no	no	UpOnDS	noCNV
GRMZM2G030744	AATACCCGTTTACCCATTGGGTGA	ZmbHLH168	GRMZM2G030744_T01	2038	0.5	-0.666	NA	NA	5	214476567	214480784	-	bhlh168	bHLH-transcription factor 168	assigned by the Grassius project, (Yilmaz et al 2009)	Uncharacterized protein	AT4G36930.1//SPT//basic helix-loop-helix (bHLH) DNA-binding superfamily protein	LOC_Os02g56140.1////helix-loop-helix DNA-binding domain containing protein, expressed	0.655874	no	no	no	others	noCNV
GRMZM2G056419	GTTGTCGCAGATCCCCGATCCGGA	NA	GRMZM2G056419_T02	5	0	-0.459	NA	NA	5	215848086	215854792	-	NA	NA	NA	Uncharacterized protein	AT2G31300.1//ARPC1,ARPC1B//actin-related protein C1B	LOC_Os02g57220.1////WD domain, G-beta repeat domain containing protein, expressed	0.166748	no	no	no	others	noCNV
GRMZM2G075628	CTTGCTTGGGACTAAAAGGCTA	NA	GRMZM2G075628_T02	4754	0.5	-0.482	NA	NA	6	120145	129443	-	NA	NA	NA	Uncharacterized protein	AT5G23150.1//HUA2//Tudor/PWWP/MBT domain-containing protein	LOC_Os03g24339.1////PWWP domain containing protein, expressed	0.115259	no	no	no	others	noCNV
GRMZM2G483598	ACAACCAGCTATTAAGCGCCGGCC	NA	GRMZM2G483598_T01	722	0	-0.511	NA	NA	6	14357580	14358669	-	NA	NA	NA	Uncharacterized protein	NA	NA	0.248768	no	no	no	others	noCNV
GRMZM2G133097	TGGGCTGGGTTGGGCTGGAATGGG	NA	GRMZM2G133097_T03	671	1	-0.489	NA	NA	6	15585041	15587524	+	NA	NA	NA	Uncharacterized protein	AT1G16070.2//AtTLP8,TLP8//tubby like protein 8	LOC_Os02g08310.1////tubby, putative, expressed	0.0989051	no	no	no	others	noCNV
GRMZM2G393433	TGGAGAAGCAGGGCACGTGCA	ZmNAC119	GRMZM2G393433_T02	814	1	-0.498	zma-MIR164g,zma-MIR164c,zma-MIR164b,zma-MIR164d,zma-MIR164a	Gene miRNA	6	16291428	16293647	-	nactf119	NAC-transcription factor 119	assigned by the Grassius project, (Yilmaz et al 2009)	NA	NA	NA	NA	NA	NA	NA	NA	NA
GRMZM5G847462	ATATCGCGTTGCTAGCTTCGTCTT	NA	GRMZM5G847462_T01	899	0.5	-0.523	NA	NA	6	39866036	39867046	+	NA	NA	NA	NA	NA	NA	NA	NA	NA	NA	NA	NA
GRMZM2G108487	AATACTGTTCACTATTTATAGGCA	NA	GRMZM2G108487_T01	1145	0	-0.471	NA	NA	6	54460301	54461603	+	NA	NA	NA	Uncharacterized protein	NA	NA	0.623953	no	no	no	others	DownCNV/PAV
GRMZM2G098594	TCCACAGGCTTTCTTGAACTG	ZmGRF7	GRMZM2G098594_T03	337	0	-0.474	zma-MIR396d,zma-MIR396c	Gene miRNA	6	60352538	60355691	-	grftf7	GRF-transcription factor 7	assigned by the Grassius project, (Yilmaz et al 2009)	Uncharacterized protein	AT3G13960.1//AtGRF5,GRF5//growth-regulating factor 5	LOC_Os06g02560.1////growth-regulating factor, putative, expressed	0.0917501	no	no	yes	others	noCNV
GRMZM2G356256	TCGACTTGGCTCGTCTTTCGC	NA	GRMZM2G356256_T01	1242	0.5	-0.477	NA	NA	6	70376371	70378592	+	NA	NA	NA	Uncharacterized protein	NA	NA	0.423871	no	no	no	others	DownCNV/PAV
GRMZM2G362298	TCCCCGACGGGGTCCCTCCCGGGA	NA	GRMZM2G362298_T02	1984	1	-0.513	NA	NA	6	74071352	74073626	+	NA	NA	NA	Transferase isoform 1%3B Transferase isoform 2%3B Uncharacterized protein	AT1G31490.1////HXXXD-type acyl-transferase family protein	LOC_Os06g05790.1////transferase family domain containing protein, expressed	0.92237	no	no	no	others	noCNV
GRMZM5G894564	AAGCTGATTCGTATCTGAGCCT	NA	GRMZM5G894564_T01	2032	0.5	-0.578	NA	Gene snRNA snoRNA	6	89625939	89628836	+	NA	NA	NA	Uncharacterized protein	NA	NA	0.0823553	no	no	no	others	noCNV
GRMZM5G894564	GCTGAGAACATTATTCTGACACA	NA	GRMZM5G894564_T01	1336	0	-0.651	NA	Gene snRNA snoRNA	6	89625939	89628836	+	NA	NA	NA	Uncharacterized protein	NA	NA	0.0823553	no	no	no	others	noCNV
GRMZM5G894564	TCAAAGCAATGGATACAAAT	NA	GRMZM5G894564_T01	2334	1	-0.638	NA	Gene snRNA snoRNA	6	89625939	89628836	+	NA	NA	NA	Uncharacterized protein	NA	NA	0.0823553	no	no	no	others	noCNV
GRMZM2G112337	ATTTGTGAAGAAGCTGAAAATAAG	NA	GRMZM2G112337_T02	1841	0	-0.515	NA	NA	6	99924872	99934458	-	NA	NA	NA	Microtubule-associated protein MAP65-1a	AT5G10770.1////Eukaryotic aspartyl protease family protein	LOC_Os06g40818.1////aspartic proteinase, putative, expressed	0.0964707	no	no	yes	others	noCNV
GRMZM2G045686	AACTTGGTCACTGGAAAAGGAA	NA	GRMZM2G045686_T03	428	0.5	-0.579	NA	NA	6	103745063	103756437	+	NA	NA	NA	Uncharacterized protein	AT1G14360.1//ATUTR3,UTR3//UDP-galactose transporter 3	LOC_Os06g39260.1////solute carrier family 35 member B1, putative, expressed	0.196361	no	no	no	others	DownCNV/PAV
GRMZM2G137593	ACATGGATTGAGAGCTAACCGAAC	NA	GRMZM2G137593_T01	1720	0	-0.505	NA	NA	6	111839865	111851295	+	NA	NA	NA	Uncharacterized protein	AT5G44250.1////Protein of unknown function DUF829, transmembrane 53	LOC_Os06g11040.1////expressed protein	0.879556	no	no	no	others	noCNV
GRMZM5G819204	AGTTCCGGGTTCGAGTCCCGGGCA	NA	GRMZM5G819204_T01	1234	0.5	-0.464	NA	Gene tRNA	6	115090019	115101289	+	NA	NA	NA	Uncharacterized protein	NA	LOC_Os06g13570.1////expressed protein	0.156453	no	no	no	others	noCNV
GRMZM2G015432	GATGAGCATCGACACATATCTGAT	NA	GRMZM2G015432_T02	2212	1	-0.494	NA	NA	6	121901214	121906150	-	NA	NA	NA	Uncharacterized protein	AT2G42740.1//RPL16A//ribosomal protein large subunit 16A	LOC_Os01g10820.1////ribosomal protein L5, putative, expressed	0.00112229	no	no	yes	UpOnDS	noCNV
GRMZM2G015432	AAATCAGTTTTAAGGGACATCTAA	NA	GRMZM2G015432_T04	920	1	-0.475	NA	NA	6	121901214	121906150	-	NA	NA	NA	Uncharacterized protein	AT2G42740.1//RPL16A//ribosomal protein large subunit 16A	LOC_Os01g10820.1////ribosomal protein L5, putative, expressed	0.00112229	no	no	yes	UpOnDS	noCNV
GRMZM2G361605	GTGTAGACTGCCCCCGCCTGAAGC	NA	GRMZM2G361605_T01	573	0.5	-0.495	NA	NA	6	131147984	131160298	-	NA	NA	NA	Uncharacterized protein	AT1G79920.1////Heat shock protein 70 (Hsp 70) family protein	LOC_Os01g08560.1////DnaK family protein, putative, expressed	9.86e-06	no	no	no	UpOnDS	noCNV
GRMZM2G052412	ACCTCGATGATGAGTAGATCTATT	NA	GRMZM2G052412_T01	1108	0	-0.463	NA	NA	6	133916804	133917966	-	NA	NA	NA	Uncharacterized protein	NA	NA	0.125198	no	no	no	others	noCNV
GRMZM2G345687	TGAGTGCCCGTGCGTTGCAACGGA	NA	GRMZM2G345687_T02	1530	0.5	-0.601	NA	NA	6	136558419	136562959	+	NA	NA	NA	Uncharacterized protein	AT1G05680.1//UGT74E2//Uridine diphosphate glycosyltransferase 74E2	LOC_Os04g12980.1////UDP-glucoronosyl/UDP-glucosyl transferase, putative, expressed	0.00528948	no	no	no	UpOnDS	DownCNV/PAV
GRMZM2G117430	CCGCGCTTGGGGTCGACTTGGC	NA	GRMZM2G117430_T01	664	1	-0.461	NA	NA	6	138672791	138674080	+	NA	NA	NA	Uncharacterized protein	NA	NA	0.225603	no	no	no	others	noCNV
GRMZM2G039113	CTAGAGCTAATAGTTAGTTGG	NA	GRMZM2G039113_T01	1920	0	-0.5	NA	NA	6	142758475	142760706	-	tan1	tangled1	Classical Gene from J.S	Tangled1%3B Uncharacterized protein	AT3G05330.1//ATN,ATTAN//cyclin family	LOC_Os02g26140.1////microtubule-binding protein TANGLED1, putative, expressed	0.32289	no	no	no	others	noCNV
GRMZM2G359365	ATTCGGTATACTGCGTAAAAATCT	NA	GRMZM2G359365_T02	424	0	-0.459	NA	NA	6	145606211	145615554	-	NA	NA	NA	Uncharacterized protein	AT5G23630.1//MIA,PDR2//phosphate deficiency response 2	LOC_Os05g33390.1////cation-transporting ATPase, putative, expressed	0.755947	no	no	no	others	noCNV
GRMZM2G147961	AGACCCACGGGTAGAATATTTAGC	NA	GRMZM2G147961_T02	1430	1	-0.489	NA	NA	6	147613888	147618725	-	NA	NA	NA	Uncharacterized protein	AT4G12760.1////	LOC_Os05g34480.1////expressed protein	0.248073	no	no	no	others	noCNV
GRMZM5G892467	TAGAAGAGCTTAGAGAGTATGC	NA	GRMZM5G892467_T01	890	1	-0.481	NA	NA	6	147845647	147847794	-	NA	NA	NA	Uncharacterized protein	NA	NA	1.27e-08	no	no	no	UpOnDS	noCNV
GRMZM2G175676	ACAAGCAAACAAAAAGTCTGAG	NA	GRMZM2G175676_T07	1019	1	-0.518	NA	NA	6	148438910	148442482	-	NA	NA	NA	Uncharacterized protein	AT4G10110.1////RNA-binding (RRM/RBD/RNP motifs) family protein	LOC_Os05g35274.2////RNA recognition motif containing protein, putative, expressed	0.65866	no	no	no	others	noCNV
GRMZM2G140805	GTCCTTGCCGCTGATGATGGAGGA	NA	GRMZM2G140805_T01	687	0.5	-0.536	NA	NA	6	155840261	155842159	+	NA	NA	NA	Nodulin-like protein	AT5G07050.1////nodulin MtN21 /EamA-like transporter family protein	LOC_Os05g41420.1////auxin-induced protein 5NG4, putative, expressed	0.320691	no	no	no	others	noCNV
GRMZM2G701221	CATTTCTCTCAGTTTTCTTGAA	NA	GRMZM2G701221_T01	981	1	-0.586	NA	others	6	157013497	157022052	+	NA	NA	NA	ER6 protein	AT1G11360.1////Adenine nucleotide alpha hydrolases-like superfamily protein	LOC_Os01g57450.1////universal stress protein domain containing protein, putative, expressed	0.16765	no	no	no	others	DownCNV/PAV
GRMZM2G096389	GGCTCCTCCAGATCCTCGCTTAGA	NA	GRMZM2G096389_T02	2344	0	-0.506	NA	NA	6	162152144	162159398	+	NA	NA	NA	Uncharacterized protein	AT2G45100.1////Cyclin/Brf1-like TBP-binding protein	LOC_Os05g23940.1////transcription initiation factor IIB, putative, expressed	0.436999	no	no	no	others	noCNV
GRMZM2G057369	ATTGGAGGGGATTGAGGAGGCT	NA	GRMZM2G057369_T01	339	1	-0.509	NA	Gene miRNA	6	163209693	163214633	+	NA	NA	NA	Anti-silencing protein 1%3B Uncharacterized protein	AT5G38110.1//ASF1B,SGA01,SGA1//anti- silencing function 1b	LOC_Os05g48030.1////anti-silencing protein, ASF1-like domain containing protein, expressed	0.00769436	no	no	no	DownOnDS	noCNV
GRMZM2G348873	CCTGCTGCTGCTGTTGCTCCT	NA	GRMZM2G348873_T01	92	0	-0.539	NA	NA	6	165448578	165453759	-	NA	NA	NA	Uncharacterized protein	AT3G27925.1//Deg1,DEGP1//DegP protease 1	LOC_Os05g49380.1////OsDegp9 - Putative Deg protease homologue, expressed	0.101179	no	no	yes	others	noCNV
GRMZM2G145552	GTTCAATTTTGCACTATCCAGCGA	NA	GRMZM2G145552_T01	862	1	-0.45	NA	NA	6	165591329	165592527	-	NA	NA	NA	Uncharacterized protein	AT2G32300.1//UCC1//uclacyanin 1	LOC_Os05g49580.1////plastocyanin-like domain containing protein, putative, expressed	0.936606	no	no	no	others	noCNV
GRMZM2G420743	TCGAGCTCCAGCACCATGTGC	NA	GRMZM2G420743_T01	1740	0	-0.608	NA	Gene snRNA snoRNA	7	1269882	1272727	-	NA	NA	NA	Dirigent-like protein pDIR3	AT5G42510.1////Disease resistance-responsive (dirigent-like protein) family protein	LOC_Os08g28790.1////dirigent, putative, expressed	0.243459	no	no	yes	others	DownCNV/PAV
GRMZM2G065040	AGGACTTAGCCCTCTTCTTCCT	NA	GRMZM2G065040_T01	588	1	-0.604	NA	NA	7	4311957	4313916	-	NA	NA	NA	NA	AT2G29180.1////	LOC_Os03g16470.1////expressed protein	0.00829787	no	no	yes	DownOnDS	noCNV
GRMZM2G056547	AGGACTTAGCCCTCTTCTTCCT	NA	GRMZM2G056547_T01	355	1	-0.493	NA	NA	7	4378161	4378699	-	NA	NA	NA	NA	AT2G29180.1////	LOC_Os03g16470.1////expressed protein	0.77732	no	no	no	others	noCNV
GRMZM2G142063	GAGCGCGAGGGCGAGCGCGAAGGG	NA	GRMZM2G142063_T02	2077	1	-0.54	NA	NA	7	5340328	5342773	+	NA	NA	NA	NA	AT1G30220.1//ATINT2,INT2//inositol transporter 2	LOC_Os07g05640.1////transporter family protein, putative, expressed	1.01e-07	no	yes	no	others	noCNV
GRMZM2G395535	AGACCAATCCAGAGGGGGATTGGA	NA	GRMZM2G395535_T01	1238	0	-0.46	NA	NA	7	6224658	6226029	+	NA	NA	NA	NA	AT5G01420.1////Glutaredoxin family protein	LOC_Os07g06600.1////glutaredoxin, putative, expressed	0.0165782	no	no	no	UpOnDS	noCNV
GRMZM2G087575	TTGGGATTTCTTGATGACACAC	NA	GRMZM2G087575_T01	1053	1	-0.474	NA	NA	7	6502603	6504145	+	NA	NA	NA	Uncharacterized protein	NA	NA	0.0585363	no	no	no	others	DownCNV/PAV
GRMZM2G107309	GCGGCGCGACCGTCTTGGTGGA	NA	GRMZM2G107309_T02	349	0.5	-0.549	NA	NA	7	7273053	7285361	-	hda110	histone deacetylase	from: Entrez Gene 541972	Histone deacetylase HDA110 isoform 2%3B Histone deacetylase HDA110 isoform 3	AT3G18520.1//ATHDA15,HDA15//histone deacetylase 15	LOC_Os07g06980.1////histone deacetylase, putative, expressed	0.213412	no	no	no	others	noCNV
GRMZM2G107309	CACGCACGCAGGGTCACCGGC	NA	GRMZM2G107309_T02	212	0	-0.464	NA	NA	7	7273053	7285361	-	hda110	histone deacetylase	from: Entrez Gene 541972	Histone deacetylase HDA110 isoform 2%3B Histone deacetylase HDA110 isoform 3	AT3G18520.1//ATHDA15,HDA15//histone deacetylase 15	LOC_Os07g06980.1////histone deacetylase, putative, expressed	0.213412	no	no	no	others	noCNV
GRMZM2G044469	ATTAGAGAAGCAATCCGGTTAGGA	NA	GRMZM2G044469_T02	949	1	-0.673	NA	NA	7	7415058	7418404	+	NA	NA	NA	NA	AT5G20960.1//AAO1,AO1,AOalpha,AT-AO1,ATAO,AtAO1//aldehyde oxidase 1	LOC_Os03g57690.1////aldehyde oxidase, putative, expressed	1.54e-08	no	no	yes	UpOnDS	noCNV
GRMZM2G030350	CCGTCGCCGGCGCGGACGGTA	NA	GRMZM2G030350_T02	560	1	-0.552	NA	NA	7	10554147	10556377	+	NA	NA	NA	Uncharacterized protein	AT2G38820.2////Protein of unknown function (DUF506)	LOC_Os03g58230.1////plant-specific domain TIGR01615 family protein, expressed	0.434291	no	no	no	others	noCNV
GRMZM2G025531	TTTTCTTTTCTTTTTCATGGC	NA	GRMZM2G025531_T02	1194	0.5	-0.66	NA	others	7	17708098	17719138	-	NA	NA	NA	Uncharacterized protein	AT3G05350.1////Metallopeptidase M24 family protein	LOC_Os07g10540.1////peptidase, M24 family protein, putative, expressed	0.827149	no	no	no	others	noCNV
GRMZM2G462325	CTCATTTGTAGCTACAAATGAGGG	NA	GRMZM2G462325_T04	1	0	-0.47	NA	NA	7	19083049	19101243	-	ost1	oligosaccharide transferase1	0	Uncharacterized protein	AT4G36790.1////Major facilitator superfamily protein	LOC_Os07g10820.1////transporter-related, putative, expressed	0.380067	no	no	no	others	noCNV
GRMZM2G031780	TTTTTGGAGTACCTCTTTTGCTGC	NA	GRMZM2G031780_T01	221	1	-0.608	NA	NA	7	21200138	21209290	-	NA	NA	NA	Uncharacterized protein	AT5G05200.1////Protein kinase superfamily protein	LOC_Os07g12530.1////ABC1 family domain containing protein, putative, expressed	0.624397	no	no	no	others	noCNV
GRMZM2G093276	TGAGTGCCCGTGCGTTGCGACGGA	NA	GRMZM2G093276_T01	712	1	-0.538	NA	NA	7	21809955	21811964	-	NA	NA	NA	ZIP zinc/iron transport family protein	AT1G05300.1//ZIP5//zinc transporter 5 precursor	LOC_Os07g12890.1////metal cation transporter, putative, expressed	0.000265142	no	yes	yes	others	noCNV
GRMZM2G016958	ATTCAAATTTGTTACCGCCGGTAT	NA	GRMZM2G016958_T03	83	0.5	-0.469	NA	NA	7	25919396	25927080	+	NA	NA	NA	Uncharacterized protein	AT3G02875.1//ILR1//Peptidase M20/M25/M40 family protein	LOC_Os07g14590.1////hydrolase, putative, expressed	0.449006	no	no	no	others	noCNV
GRMZM2G082830	CCGCCAGTGCTAGGGGCCAGTGGA	NA	GRMZM2G082830_T01	142	0	-0.692	NA	NA	7	27326607	27328595	+	NA	NA	NA	NA	AT2G37710.1//RLK//receptor lectin kinase	LOC_Os07g18240.1////lectin-like receptor kinase, putative, expressed	0.100281	no	no	no	others	noCNV
GRMZM2G016622	ACACATTGTGCAAGGGTAGCAGGT	NA	GRMZM2G016622_T02	1281	0	-0.495	NA	NA	7	38037621	38039486	+	gpm930	0	0	Photosystem I reaction center subunit IV A	AT2G20260.1//PSAE-2//photosystem I subunit E-2	LOC_Os07g25430.1////photosystem I reaction center subunit IV A, chloroplast precursor, putative, expressed	0.00519274	no	yes	yes	DownOnDS	noCNV
GRMZM2G016622	AATGACAGAACACAGAATGATAGT	NA	GRMZM2G016622_T01	1081	1	-0.506	NA	NA	7	38037621	38039486	+	gpm930	0	0	Photosystem I reaction center subunit IV A	AT2G20260.1//PSAE-2//photosystem I subunit E-2	LOC_Os07g25430.1////photosystem I reaction center subunit IV A, chloroplast precursor, putative, expressed	0.00519274	no	yes	yes	DownOnDS	noCNV
GRMZM2G173777	CCACTCTGCAACGGCCCAGCCGGA	NA	GRMZM2G173777_T03	3159	1	-0.465	NA	NA	7	41183896	41191521	+	NA	NA	NA	NA	AT3G54230.2//SUA//suppressor of abi3-5	LOC_Os02g07070.1////RNA recognition motif family protein, expressed	0.860872	no	no	no	others	noCNV
GRMZM2G051720	TTGGTGGAAACCACTAAAAGTCGT	NA	GRMZM2G051720_T01	1239	1	-0.511	NA	NA	7	55629990	55631734	-	NA	NA	NA	Uncharacterized protein	AT3G45750.1////Nucleotidyltransferase family protein	LOC_Os08g44560.1////expressed protein	0.656788	no	no	no	others	noCNV
GRMZM2G001114	AAAAGAGAAAGAGAGAGAACGG	NA	GRMZM2G001114_T01	1928	1	-0.498	NA	NA	7	82672544	82681910	-	umc1433	0	0	Protein binding protein%3B Uncharacterized protein	AT1G08050.1////Zinc finger (C3HC4-type RING finger) family protein	LOC_Os09g12720.1////zinc finger, C3HC4 type domain containing protein, expressed	9e-10	no	yes	no	DownOnDS	noCNV
GRMZM2G137971	TTGGATCCCTTCATTTTAGAGGAA	NA	GRMZM2G137971_T01	281	1	-0.534	NA	NA	7	86760724	86772751	-	NA	NA	NA	Uncharacterized protein	AT3G14910.1////	LOC_Os09g14680.1////expressed protein	0.839245	no	no	no	others	noCNV
GRMZM2G129453	ATTAGTCCCTAGAAACCAAACACC	NA	GRMZM2G129453_T01	2060	0	-0.556	NA	NA	7	92966320	92968603	-	NA	NA	NA	Desaturase/cytochrome b5 protein%3B Uncharacterized protein	AT2G46210.1////Fatty acid/sphingolipid desaturase	LOC_Os09g16920.1////desaturase/cytochrome b5 protein, putative, expressed	4.97e-23	no	yes	yes	DownOnDS	noCNV
GRMZM2G414813	TTTGGGCAAGTAATACCCAGCGGG	NA	GRMZM2G414813_T01	1059	0	-0.464	NA	NA	7	104912102	104917076	+	NA	NA	NA	Uncharacterized protein	AT5G62890.1////Xanthine/uracil permease family protein	LOC_Os09g21340.1////nucleobase-ascorbate transporter, putative, expressed	7.75e-14	no	yes	no	UpOnDS	noCNV
GRMZM2G045748	AAATAAGTTACTTTATTGAGTGAA	ZmMYB162	GRMZM2G045748_T02	1259	0	-0.652	NA	NA	7	112497750	112499904	+	myb162	MYB-transcription factor 162	assigned by the Grassius project, (Yilmaz et al 2009)	NA	AT3G28910.1//ATMYB30,MYB30//myb domain protein 30	LOC_Os07g30130.1////MYB family transcription factor, putative, expressed	0.582476	no	no	no	others	noCNV
GRMZM2G042006	ACCCTCCGGTTGGGCCGTTGCAGA	NA	GRMZM2G042006_T03	152	0	-0.599	NA	NA	7	114382342	114386278	+	NA	NA	NA	Double-stranded RNA binding motif family protein%3B Uncharacterized protein	AT4G00420.3////Double-stranded RNA-binding domain (DsRBD)-containing protein	LOC_Os09g24954.1////double-stranded RNA binding motif containing protein, expressed	0.757213	no	no	no	others	noCNV
GRMZM2G114642	GGTGAAAGAGCTCATTGGTGGAGG	NA	GRMZM2G114642_T02	1286	1	-0.494	NA	NA	7	118550916	118556690	+	gl1	glossy1	Classical Gene from J.S	Glossy1	AT5G57800.1//CER3,FLP1,WAX2,YRE//Fatty acid hydroxylase superfamily	LOC_Os09g25850.1////WAX2, putative, expressed	5.97e-07	no	no	yes	DownOnDS	noCNV
GRMZM2G114642	AGAGAACGACAGAGCAAGTGGTGC	NA	GRMZM2G114642_T02	1314	0.5	-0.493	NA	NA	7	118550916	118556690	+	gl1	glossy1	Classical Gene from J.S	Glossy1	AT5G57800.1//CER3,FLP1,WAX2,YRE//Fatty acid hydroxylase superfamily	LOC_Os09g25850.1////WAX2, putative, expressed	5.97e-07	no	no	yes	DownOnDS	noCNV
GRMZM2G151407	ATTCTTCTTACAAGAACACAGCGA	ZmWRKY52	GRMZM2G151407_T02	203	1	-0.548	NA	NA	7	131319563	131323434	-	wrky52	WRKY-transcription factor 52	assigned by the Grassius project, (Yilmaz et al 2009)	Putative uncharacterized protein	AT5G56270.1//ATWRKY2,WRKY2//WRKY DNA-binding protein 2	LOC_Os09g30400.1////WRKY90, expressed	0.152092	no	no	no	others	noCNV
GRMZM2G000288	AGTGCCCGTGCGTTGCAACGGGGA	NA	GRMZM2G000288_T01	42	1	-0.548	NA	NA	7	138128865	138130245	+	NA	NA	NA	NA	NA	NA	0.0134792	no	no	no	UpOnDS	noCNV
GRMZM2G149619	GAATGGCAGAACACGGAATGGGGC	NA	GRMZM2G149619_T01	2171	0.5	-0.536	NA	NA	7	140853966	140857824	+	NA	NA	NA	Uncharacterized protein	AT4G22840.1////Sodium Bile acid symporter family	LOC_Os09g34900.1////bile acid sodium symporter family protein, putative, expressed	3.18e-06	no	no	no	DownOnDS	noCNV
GRMZM2G004880	ACGGTAGGACTAAAATAGGGACTA	NA	GRMZM2G004880_T01	1818	1	-0.499	NA	NA	7	154456734	154460237	+	pdrp2	PDK regulatory protein2	Chastain et al, 2017	Uncharacterized protein	AT4G21210.1//ATRP1,RP1//PPDK regulatory protein	LOC_Os07g34640.2////pyruvate Pi dikinase regulatory protein, putative, expressed	0.157918	no	no	no	others	noCNV
GRMZM2G165644	AGCTTTTCTGAGAATCTGGCTGTG	NA	GRMZM2G165644_T02	829	0	-0.759	NA	NA	7	154553217	154555567	+	NA	NA	NA	Uncharacterized protein	AT4G23310.1//CRK23//cysteine-rich RLK (RECEPTOR-like protein kinase) 23	LOC_Os07g47230.1////TKL_IRAK_DUF26-lh.10 - DUF26 kinases have homology to DUF26 containing loci, expressed	0.0162299	no	no	no	UpOnDS	noCNV
GRMZM2G057281	GGGTCTCACATCTCTATATAAGGA	NA	GRMZM2G057281_T01	322	0	-0.7	NA	NA	7	157607233	157609225	+	NA	NA	NA	Chlorophyll a-b binding protein of LHCII type III	AT5G54270.1//LHCB3,LHCB3*1//light-harvesting chlorophyll B-binding protein 3	LOC_Os07g37550.1////chlorophyll A-B binding protein, putative, expressed	0.000664716	no	no	yes	DownOnDS	noCNV
GRMZM2G057475	TGGGCTGTGGCTGTGAAAAAAGT	NA	GRMZM2G057475_T03	1767	0.5	-0.528	NA	NA	7	157631288	157636354	+	NA	NA	NA	Uncharacterized protein	AT4G21540.1//SPHK1//sphingosine kinase 1	LOC_Os01g57350.2////diacylglycerol kinase, putative, expressed	0.195356	no	no	no	others	noCNV
GRMZM2G380656	ATAGACGTCAGTGAAGACTTACGC	NA	GRMZM2G380656_T01	1172	0	-0.472	NA	NA	7	158998200	158999609	+	NA	NA	NA	NA	NA	NA	0.23288	no	no	no	others	noCNV
GRMZM5G889052	AAATATGACCTACGGTTGGATCGT	NA	GRMZM5G889052_T01	2110	0	-0.637	NA	NA	7	160189921	160192923	+	NA	NA	NA	Putative uncharacterized protein	AT2G44260.1////Plant protein of unknown function (DUF946)	LOC_Os07g38840.1////expressed protein	0.137042	no	no	no	others	noCNV
GRMZM2G008468	TGGGGAGCTAAAACCCGACGGGGA	NA	GRMZM2G008468_T01	1153	0.5	-0.451	NA	NA	7	162759941	162762977	+	NA	NA	NA	Golgi transport 1 protein B	AT3G03180.1////Got1/Sft2-like vescicle transport protein family	LOC_Os03g11100.1////vesicle transport protein GOT1B, putative, expressed	0.876403	no	no	no	others	noCNV
GRMZM5G862931	ACGGTTGGACTTAAACAAACACAA	NA	GRMZM5G862931_T03	1357	0	-0.485	NA	NA	7	163387138	163397911	+	NA	NA	NA	Uncharacterized protein	AT1G26520.1////Cobalamin biosynthesis CobW-like protein	LOC_Os07g40790.1////COBW domain containing protein, putative, expressed	0.000594946	no	no	no	UpOnDS	noCNV
GRMZM2G126706	ATACCTATACTCATTTACGCTCGT	NA	GRMZM2G126706_T03	513	1	-0.478	NA	NA	7	168522661	168527050	+	NA	NA	NA	Uncharacterized protein	AT4G01790.1////Ribosomal protein L7Ae/L30e/S12e/Gadd45 family protein	LOC_Os07g44230.1////ribosomal protein L7Ae/L30e/S12e/Gadd45 family protein, putative, expressed	0.128578	no	no	no	others	noCNV
GRMZM2G166738	ATAGGTCACGTTGTTGGAGATGCT	NA	GRMZM2G166738_T02	2617	0	-0.549	NA	NA	7	172976981	172981341	-	NA	NA	NA	Uncharacterized protein	AT2G40540.1//ATKT2,ATKUP2,KT2,KUP2,SHY3,TRK2//potassium transporter 2	LOC_Os07g48130.1////potassium transporter, putative, expressed	0.595203	no	no	no	others	noCNV
GRMZM2G023438	TTTGAATGCACTAGAACTAAT	NA	GRMZM2G023438_T03	128	1	-0.493	NA	NA	7	174189332	174193300	+	NA	NA	NA	Uncharacterized protein	AT1G09270.1//IMPA-4//importin alpha isoform 4	LOC_Os07g48880.1////importin subunit alpha-1b, putative, expressed	0.00906207	no	no	no	UpOnDS	noCNV
GRMZM2G023438	AAACTTTAGCACTTCAATTCATAT	NA	GRMZM2G023438_T03	1	0	-0.506	NA	NA	7	174189332	174193300	+	NA	NA	NA	Uncharacterized protein	AT1G09270.1//IMPA-4//importin alpha isoform 4	LOC_Os07g48880.1////importin subunit alpha-1b, putative, expressed	0.00906207	no	no	no	UpOnDS	noCNV
GRMZM2G023438	AGGCCCTGTTCCAATCTCGCGAGA	NA	GRMZM2G023438_T03	100	0	-0.583	NA	NA	7	174189332	174193300	+	NA	NA	NA	Uncharacterized protein	AT1G09270.1//IMPA-4//importin alpha isoform 4	LOC_Os07g48880.1////importin subunit alpha-1b, putative, expressed	0.00906207	no	no	no	UpOnDS	noCNV
GRMZM2G324973	CATGTCCATTTTAGAGTGTTGGCT	NA	GRMZM2G324973_T01	1385	0	-0.464	NA	NA	7	175562656	175568845	-	NA	NA	NA	Uncharacterized protein	NA	NA	0.000192296	no	no	yes	UpOnDS	noCNV
GRMZM2G400497	GATAGACATGATCATTTGAATCGC	NA	GRMZM2G400497_T01	351	0	-0.514	NA	NA	8	839459	841251	+	NA	NA	NA	Uncharacterized protein	AT1G02360.1////Chitinase family protein	LOC_Os01g18400.1////CHIT10 - Chitinase family protein precursor, expressed	0.464	no	no	no	others	DownCNV/PAV
GRMZM2G030280	GGCCAGTGTGCGGAGGACCGGA	ZmbZIP72	GRMZM2G030280_T02	187	0	-0.556	NA	NA	8	1640229	1650451	-	bzip72	bZIP-transcription factor 72	assigned by the Grassius project, (Yilmaz et al 2009)	Putative bZIP transcription factor superfamily protein%3B Uncharacterized protein	AT3G12250.1//BZIP45,TGA6//TGACG motif-binding factor 6	LOC_Os01g17260.1////transcription factor, putative, expressed	0.162603	no	no	no	others	noCNV
GRMZM2G153434	CAGTTTTTTGAGCCGAAGGCGA	NA	GRMZM2G153434_T01	1511	1	-0.596	NA	NA	8	3884033	3891436	+	NA	NA	NA	PQ loop repeat family protein%3B Uncharacterized protein	AT2G41050.1////PQ-loop repeat family protein / transmembrane family protein	LOC_Os01g16170.1////PQ loop repeat domain containing protein, expressed	0.827989	no	no	no	others	noCNV
GRMZM2G004006	AAGAGAGGCTCTAAACATGGTCCT	NA	GRMZM2G004006_T01	1350	0.5	-0.615	NA	NA	8	6855469	6857376	+	NA	NA	NA	Uncharacterized protein	AT4G24930.1////thylakoid lumenal 17.9 kDa protein, chloroplast	LOC_Os01g01280.1////expressed protein	0.132817	no	no	no	others	noCNV
GRMZM2G004006	CATAAAACATCCTTCCAACAGCGG	NA	GRMZM2G004006_T01	1303	1	-0.469	NA	NA	8	6855469	6857376	+	NA	NA	NA	Uncharacterized protein	AT4G24930.1////thylakoid lumenal 17.9 kDa protein, chloroplast	LOC_Os01g01280.1////expressed protein	0.132817	no	no	no	others	noCNV
GRMZM2G004006	ATCAAATGGTTATAGGGCTCGGTC	NA	GRMZM2G004006_T01	1260	0	-0.478	NA	NA	8	6855469	6857376	+	NA	NA	NA	Uncharacterized protein	AT4G24930.1////thylakoid lumenal 17.9 kDa protein, chloroplast	LOC_Os01g01280.1////expressed protein	0.132817	no	no	no	others	noCNV
GRMZM2G080937	TTCCTCTGGATATGCTCCCTGC	NA	GRMZM2G080937_T02	593	1	-0.453	NA	NA	8	7977578	7982579	+	NA	NA	NA	Uncharacterized protein	AT1G27510.1////Protein of unknown function (DUF3506)	LOC_Os01g01790.1////expressed protein	1.43e-16	no	yes	no	UpOnDS	noCNV
GRMZM2G155709	CACCTATTCACCCCCCCTCTAGGT	NA	GRMZM2G155709_T03	2127	1	-0.597	NA	NA	8	11530211	11538172	-	NA	NA	NA	Uncharacterized protein	AT1G23170.2////Protein of unknown function DUF2359, transmembrane	LOC_Os01g03760.1////expressed protein	0.0840621	no	no	no	others	noCNV
GRMZM2G132021	AGTGCCTCAAATTGAAATATAGGG	NA	GRMZM2G132021_T04	179	0	-0.596	NA	NA	8	12557722	12566051	+	crs2	chloroplast RNA splicing2	Classical Gene from J.S	Chloroplastic group IIB intron splicing facilitator CRS2%2C chloroplastic	AT5G16140.1////Peptidyl-tRNA hydrolase family protein	LOC_Os01g04130.1////peptidyl-tRNA hydrolase, mitochondrial precursor protein, putative, expressed	0.674317	no	no	no	others	noCNV
GRMZM2G165987	CTCGGAGTTAGAGAATTATGGAGC	NA	GRMZM2G165987_T01	11	1	-0.481	NA	NA	8	13592880	13595740	+	NA	NA	NA	Pirin-like protein%3B Uncharacterized protein	AT2G43120.1////RmlC-like cupins superfamily protein	LOC_Os03g62790.1////pirin, putative, expressed	0.0130574	no	no	yes	DownOnDS	noCNV
GRMZM2G130953	AAAAGATCATAGCTCAACAAGTT	NA	GRMZM2G130953_T02	1142	1	-0.475	NA	NA	8	18321199	18323290	-	bif1	barren inflorescence1	Galli et al., 2015; and assigned by the Grassius project, (Yilmaz et al 2009) to iaa35	IAA1-auxin-responsive Aux/IAA family member%3B Uncharacterized protein	AT1G04250.1//AXR3,IAA17//AUX/IAA transcriptional regulator family protein	LOC_Os01g08320.1////OsIAA1 - Auxin-responsive Aux/IAA gene family member, expressed	0.0121928	no	no	no	UpOnDS	noCNV
GRMZM2G032049	TCCCGCACTGTGCGGGGTCTGGGG	NA	GRMZM2G032049_T01	2882	0	-0.464	NA	NA	8	21821792	21828125	+	NA	NA	NA	Glutaminyl-tRNA synthetase	AT1G25350.1//OVA9//glutamine-tRNA ligase, putative / glutaminyl-tRNA synthetase, putative / GlnRS, putative	LOC_Os01g09000.1////glutaminyl-tRNA synthetase, putative, expressed	0.000812144	no	no	no	UpOnDS	noCNV
GRMZM2G079790	AAATTGCCTGGATCGGAAAATCGC	NA	GRMZM2G079790_T01	51	0	-0.462	NA	NA	8	31991999	31993305	-	NA	NA	NA	Uncharacterized protein	NA	NA	0.010727	no	no	no	UpOnDS	noCNV
GRMZM2G155216	AGTATATTTTATAGAATTTAGGGC	NA	GRMZM2G155216_T01	170	0.5	-0.534	NA	NA	8	70312571	70314733	-	lhcb3	light harvesting chlorophyll a/b binding protein3	Classical Gene from J.S	Chlorophyll a-b binding protein M9%2C chloroplastic	AT2G34420.1//LHB1B2,LHCB1.5//photosystem II light harvesting complex gene B1B2	LOC_Os09g17740.1////chlorophyll A-B binding protein, putative, expressed	0.0171199	no	no	yes	DownOnDS	noCNV
GRMZM2G403797	AGTGTCTTAGCTCTATGTTCGAGA	NA	GRMZM2G403797_T01	105	0	-0.6	NA	NA	8	71815346	71817424	+	wtf1	what's this factor1	Classical Gene from J.S	What's this factor1	AT4G01037.1//AtWTF1,WTF1//Ubiquitin carboxyl-terminal hydrolase family protein	LOC_Os05g49610.1////ubiquitin carboxyl-terminal hydrolase, family 1, putative, expressed	0.394066	no	no	no	others	noCNV
GRMZM2G083344	TGCAAGTTGATCCAACGGGGG	NA	GRMZM2G083344_T01	21	1	-0.636	NA	NA	8	94352445	94383332	-	NA	NA	NA	Uncharacterized protein	AT5G46110.4//APE2,TPT//Glucose-6-phosphate/phosphate translocator-related	LOC_Os05g15160.1////phosphate/phosphate translocator, putative, expressed	0.00028302	no	yes	no	DownOnDS	noCNV
GRMZM5G808899	AACTTTGGCAGTAGATCGTATT	NA	GRMZM5G808899_T01	832	1	-0.755	NA	NA	8	100895437	100898434	+	NA	NA	NA	Uncharacterized protein	AT4G24330.1////Protein of unknown function (DUF1682)	LOC_Os05g35710.1////coiled-coil domain-containing protein 47 precursor, putative, expressed	0.187491	no	no	no	others	noCNV
GRMZM2G033799	ACCATATCGAATTTTGCACTGGGC	NA	GRMZM2G033799_T03	1373	0	-0.476	NA	NA	8	100920138	100924873	+	got5	glutamate-oxaloacetate transaminase5	from Tausta et al 2014	Aspartate aminotransferase%3B Uncharacterized protein	AT2G22250.2//AAT,ATAAT,MEE17//aspartate aminotransferase	LOC_Os01g65090.1////aminotransferase, classes I and II, domain containing protein, expressed	0.0011993	no	no	no	DownOnDS	noCNV
GRMZM2G082894	ATAGAAGCTGGCTGAAAAGCTGAG	NA	GRMZM2G082894_T01	971	0	-0.537	NA	NA	8	121429032	121431846	-	NA	NA	NA	Uncharacterized protein	AT4G27390.1////	LOC_Os05g42280.1////expressed protein	0.284726	no	no	no	others	noCNV
GRMZM2G163546	GACGGTCCGCGGCACAGGGCCGGA	NA	GRMZM2G163546_T01	117	0	-0.49	NA	NA	8	124152085	124153582	+	NA	NA	NA	Uncharacterized protein	AT2G43780.1////	LOC_Os05g01330.1////expressed protein	0.869899	no	no	no	others	noCNV
AC205471.4_FG007	ATTGATTCCGTAGCAACGCACGGG	NA	AC205471.4_FGT007	595	0	-0.593	NA	NA	8	124755914	124756553	-	NA	NA	NA	Uncharacterized protein	AT4G21970.1////Protein of unknown function, DUF584	LOC_Os05g45450.1////DUF584 domain containing protein, putative, expressed	2.23e-08	no	yes	yes	others	noCNV
GRMZM2G096764	AAAGTTTATCTCGCGAGATTGGAA	NA	GRMZM2G096764_T02	1380	0.5	-0.674	NA	NA	8	138677873	138685412	-	NA	NA	NA	Uncharacterized protein	AT2G26140.1//ftsh4//FTSH protease 4	LOC_Os01g39260.1////OsFtsH5 FtsH protease, homologue of AtFtsH4, expressed	7.57e-08	no	no	no	UpOnDS	noCNV
GRMZM2G304573	CGCCCCCGGCAGCCGTCGTCGGC	ZmWRKY84	GRMZM2G304573_T01	308	1	-0.496	NA	NA	8	139485939	139486968	-	wrky84	WRKY-transcription factor 84	assigned by the Grassius project, (Yilmaz et al 2009)	Putative WRKY DNA-binding domain superfamily protein	AT1G68150.1//ATWRKY9,WRKY9//WRKY DNA-binding protein 9	LOC_Os01g40430.1////WRKY27, expressed	0.0346803	no	no	no	others	noCNV
GRMZM2G117754	ATATTAATCCAAAGGATCTAGGGG	NA	GRMZM2G117754_T02	13	0	-0.535	NA	NA	8	142511549	142517106	+	NA	NA	NA	Alpha-L-fucosidase 2%3B Uncharacterized protein	AT2G27360.1////GDSL-like Lipase/Acylhydrolase superfamily protein	LOC_Os01g42730.1////GDSL-like lipase/acylhydrolase, putative, expressed	2.9e-05	no	no	yes	DownOnDS	noCNV
GRMZM2G050003	ATTAGTCCCTAGAAACCAAACACC	NA	GRMZM2G050003_T01	2146	0	-0.501	NA	NA	8	146524792	146529675	+	NA	NA	NA	Uncharacterized protein	AT1G80300.1//ATNTT1,NTT1//nucleotide transporter 1	LOC_Os01g45910.1////plastidic ATP/ADP-transporter, putative, expressed	0.188831	no	no	no	others	noCNV
GRMZM2G157043	AAATTTGGCTGTCTGTTATTATGC	NA	GRMZM2G157043_T03	232	1	-0.523	NA	NA	8	152797060	152801787	-	NA	NA	NA	Putative CRAL/TRIO domain containing%2C Sec14p-like phosphatidylinositol transfer family protein	AT1G19650.1////Sec14p-like phosphatidylinositol transfer family protein	LOC_Os05g46720.1////phosphatidylinositol transfer, putative, expressed	0.25412	no	no	no	others	noCNV
GRMZM2G131708	AGTGAGGAGTGAGAAGATGATGGA	NA	GRMZM2G131708_T01	1613	1	-0.69	NA	NA	8	154186072	154190129	-	NA	NA	NA	Uncharacterized protein	AT4G29590.1////S-adenosyl-L-methionine-dependent methyltransferases superfamily protein	LOC_Os01g51530.1////methyltransferase domain containing protein, expressed	0.126634	no	yes	no	others	noCNV
GRMZM2G341404	ATGCTTTCTTCAATTCTGAGCT	NA	GRMZM2G341404_T01	1226	1	-0.448	NA	NA	8	155964570	155969639	-	NA	NA	NA	DnaJ subfamily C member 7	AT5G03160.1//ATP58IPK,P58IPK//homolog of mamallian P58IPK	LOC_Os01g74580.1////dnaJ homolog subfamily C member, putative, expressed	0.348193	no	no	no	others	noCNV
AC155376.2_FG004	CGTCGTCGTCGGAGAACCGCGC	NA	AC155376.2_FGT004	1570	1	-0.492	NA	NA	8	163685360	163687718	+	NA	NA	NA	Uncharacterized protein	AT3G25500.1//AFH1,AHF1,ATFH1,FH1//formin homology 1	LOC_Os01g67240.1////formin-like protein 1 precursor, putative, expressed	1.19e-12	no	yes	no	DownOnDS	noCNV
GRMZM2G005236	GAGAGAAAGAGAGGAAGGA	NA	GRMZM2G005236_T01	133	1	-0.552	NA	NA	8	165092449	165098186	-	NA	NA	NA	Uncharacterized protein	AT1G22910.1////RNA-binding (RRM/RBD/RNP motifs) family protein	LOC_Os01g65550.1////RNA recognition motif containing protein, putative, expressed	2.48e-07	no	yes	no	DownOnDS	noCNV
GRMZM2G035805	AATAAAAAGAAACGGAGGGAG	NA	GRMZM2G035805_T01	18	1	-0.519	NA	NA	8	168465982	168466855	+	NA	NA	NA	Uncharacterized protein	AT3G55515.1//DVL8,RTFL7//ROTUNDIFOLIA like 7	LOC_Os01g62605.1////expressed protein	0.238258	no	no	no	others	noCNV
GRMZM2G557357	AAGTGTTGGCGAATTCGATGAACA	NA	GRMZM2G557357_T01	1221	1	-0.653	NA	NA	8	171878704	171880732	-	NA	NA	NA	Uncharacterized protein	NA	NA	0.474947	no	no	no	others	noCNV
GRMZM2G136250	TATATAAGTTGGATTATGGTG	NA	GRMZM2G136250_T03	8	1	-0.456	NA	NA	8	173146154	173153473	+	NA	NA	NA	Cupin%2C RmlC-type%3B Cupin%2C RmlC-type isoform 1%3B Cupin%2C RmlC-type isoform 2%3B Cupin%2C RmlC-type isoform 3	AT3G58670.1////Protein of unknown function (DUF1637)	LOC_Os04g06790.1////2-aminoethanethiol dioxygenase, putative, expressed	0.165198	no	no	no	others	noCNV
GRMZM2G406155	GGAGGGAGAGAAGAAGAAGGGG	NA	GRMZM2G406155_T01	951	1	-0.484	NA	NA	8	173162555	173163618	+	NA	NA	NA	Uncharacterized protein	AT1G29195.1////	LOC_Os05g07240.1////expressed protein	0.014775	no	no	no	DownOnDS	noCNV
GRMZM2G446170	AGTGTCTTAGCTCTATGTTCGAGA	NA	GRMZM2G446170_T04	448	0.5	-0.501	NA	NA	8	175285916	175288181	-	burp1	BURP domain-containing protein-RD22-like1	0	Uncharacterized protein	AT5G25610.1//ATRD22,RD22//BURP domain-containing protein	LOC_Os01g53240.1////BURP domain containing protein, expressed	1.18e-19	no	yes	yes	DownOnDS	noCNV
GRMZM2G063765	CGGAGGAAGGAGAGGATGAGGC	NA	GRMZM2G063765_T01	985	1	-0.466	NA	Gene rRNA	9	1028108	1031618	+	NA	NA	NA	Putative DUF26 domain family protein%3B Uncharacterized protein	AT2G01660.1//PDLP6//plasmodesmata-located protein 6	LOC_Os06g14280.1////cysteine-rich repeat secretory protein precursor, putative, expressed	0.00517043	no	no	no	DownOnDS	noCNV
GRMZM2G116966	AACTATAGACGGCTGCTGATGGTC	NA	GRMZM2G116966_T01	1807	0.5	-0.635	NA	NA	9	2118350	2121095	-	NA	NA	NA	Benzoate carboxyl methyltransferase	AT5G04370.2//NAMT1//S-adenosyl-L-methionine-dependent methyltransferases superfamily protein	LOC_Os06g13350.1////SAM dependent carboxyl methyltransferase, putative, expressed	3.75e-26	no	yes	yes	DownOnDS	noCNV
GRMZM2G000231	ATGTCTAAAACATGTGTCTTACGA	NA	GRMZM2G000231_T01	363	0	-0.589	NA	NA	9	7312254	7320386	-	NA	NA	NA	Uncharacterized protein	AT5G36210.1////alpha/beta-Hydrolases superfamily protein	LOC_Os06g11190.1////OsPOP13 - Putative Prolyl Oligopeptidase homologue, expressed	0.036683	no	no	no	DownOnDS	noCNV
GRMZM2G033805	AAAATACTGTAGAAGCCGCAGCCG	NA	GRMZM2G033805_T01	2896	0.5	-0.58	NA	NA	9	9315632	9319213	-	NA	NA	NA	Putative DUF231 domain containing family protein	AT5G06700.1//TBR//Plant protein of unknown function (DUF828)	LOC_Os06g10560.1////leaf senescence related protein, putative, expressed	0.00271193	no	no	no	UpOnDS	noCNV
GRMZM2G000393	TTTTGGTGGCCAGAAGCTGCCAGA	NA	GRMZM2G000393_T01	1419	0	-0.575	NA	NA	9	14548030	14553129	-	NA	NA	NA	Uncharacterized protein	AT4G32120.1////Galactosyltransferase family protein	LOC_Os06g07905.1////galactosyltransferase family protein, putative, expressed	0.700684	no	no	no	others	noCNV
GRMZM2G000393	GCTGAAAAGCTGAGCGTTTGGCAG	NA	GRMZM2G000393_T01	1454	1	-0.624	NA	NA	9	14548030	14553129	-	NA	NA	NA	Uncharacterized protein	AT4G32120.1////Galactosyltransferase family protein	LOC_Os06g07905.1////galactosyltransferase family protein, putative, expressed	0.700684	no	no	no	others	noCNV
GRMZM2G071249	TTTCGACCCCGGGGGGTCCCTGGA	NA	GRMZM2G071249_T01	2341	1	-0.691	NA	NA	9	17669887	17679026	+	NA	NA	NA	Uncharacterized protein	AT4G01130.1////GDSL-like Lipase/Acylhydrolase superfamily protein	LOC_Os06g06520.1////GDSL-like lipase/acylhydrolase, putative, expressed	0.137452	no	no	no	others	noCNV
GRMZM2G052562	GTGGATTGAGTGGGATTGGATGGG	NA	GRMZM2G052562_T02	1488	0.5	-0.553	NA	NA	9	18630211	18632350	+	znod1	Zea nodulation homolog1	0	Alpha-L-fucosidase 2%3B Alpha-L-fucosidase 2 isoform 1%3B Alpha-L-fucosidase 2 isoform 2%3B Uncharacterized protein	AT5G45910.1////GDSL-like Lipase/Acylhydrolase superfamily protein	LOC_Os05g11910.1////GDSL-like lipase/acylhydrolase, putative, expressed	9.96e-13	no	no	yes	DownOnDS	noCNV
GRMZM2G000932	CGGCCGTGGCCTCTTCGGCGGC	NA	GRMZM2G000932_T01	292	1	-0.585	NA	NA	9	24497102	24499075	-	NA	NA	NA	Uncharacterized protein	AT4G24050.1////NAD(P)-binding Rossmann-fold superfamily protein	LOC_Os06g03830.1////retinol dehydrogenase, putative, expressed	0.000714886	no	no	no	others	noCNV
GRMZM2G042323	TGTTTGGTTCCATGGGACTAA	NA	GRMZM2G042323_T02	1417	1	-0.474	NA	NA	9	25822537	25828426	-	NA	NA	NA	Uncharacterized protein	NA	LOC_Os06g02520.1////interacting protein of DMI3, putative, expressed	0.122323	no	no	no	others	noCNV
GRMZM2G042080	ATTAGCTAGGGTGTTTGGATGTCT	NA	GRMZM2G042080_T03	409	1	-0.551	NA	NA	9	25828876	25831557	+	NA	NA	NA	Superoxide dismutase	AT5G51100.1//FSD2//Fe superoxide dismutase 2	LOC_Os06g02500.1////superoxide dismutase, chloroplast, putative, expressed	0.318226	no	no	no	others	noCNV
GRMZM2G393146	GACGGGGATTTATCCCCGCGGGGA	NA	GRMZM2G393146_T01	4306	0.5	-0.571	NA	NA	9	26491999	26500254	+	NA	NA	NA	Uncharacterized protein	AT5G35930.1////AMP-dependent synthetase and ligase family protein	LOC_Os06g02160.1////AMP-binding enzyme family protein, expressed	0.0373527	no	no	no	UpOnDS	noCNV
GRMZM5G817759	AGTGTCTTAGCTCTATGTTCGAGA	NA	GRMZM5G817759_T04	986	0	-0.613	NA	NA	9	26608761	26612851	-	NA	NA	NA	Uncharacterized protein	AT1G26180.1////	LOC_Os02g22060.1////expressed protein	0.237567	no	no	no	others	noCNV
GRMZM2G163914	ATGTTTCCGTTGCAACGCACGGGC	ZmNAC117	GRMZM2G163914_T01	4090	1	-0.5	NA	NA	9	28857463	28862279	+	nactf117	NAC-transcription factor 117	assigned by the Grassius project, (Yilmaz et al 2009)	Putative NAC domain transcription factor superfamily protein%3B Uncharacterized protein	AT4G35580.2//NTL9//NAC transcription factor-like 9	LOC_Os06g01230.1////no apical meristem protein, putative, expressed	0.983117	no	no	no	others	noCNV
GRMZM2G163914	TGAGTGCCCGTGCGTTGCAACGGA	ZmNAC117	GRMZM2G163914_T01	224	1	-0.536	NA	NA	9	28857463	28862279	+	nactf117	NAC-transcription factor 117	assigned by the Grassius project, (Yilmaz et al 2009)	Putative NAC domain transcription factor superfamily protein%3B Uncharacterized protein	AT4G35580.2//NTL9//NAC transcription factor-like 9	LOC_Os06g01230.1////no apical meristem protein, putative, expressed	0.983117	no	no	no	others	noCNV
GRMZM2G121418	ATAGTCTTATGTGATGGATCTGGC	NA	GRMZM2G121418_T01	1587	1	-0.522	NA	others	9	43535207	43538696	+	NA	NA	NA	Uncharacterized protein	AT4G11000.1////Ankyrin repeat family protein	LOC_Os06g18990.1////embryogenesis transmembrane protein, putative, expressed	4.19e-06	no	no	no	DownOnDS	noCNV
GRMZM2G398628	AACTTCCTACGGCTGACTCTAGGA	NA	GRMZM2G398628_T01	1358	1	-0.566	NA	NA	9	50077212	50079848	-	NA	NA	NA	Uncharacterized protein	AT2G18950.1//ATHPT,HPT1,TPT1,VTE2//homogentisate phytyltransferase 1	LOC_Os04g55700.1////exonuclease, putative, expressed	0.519019	no	no	no	others	noCNV
GRMZM2G451112	GTGCATGAACTCACCAAAGGTGGG	NA	GRMZM2G451112_T01	1910	0	-0.5	NA	NA	9	89133594	89135770	+	NA	NA	NA	Uncharacterized protein	NA	NA	0.00210308	no	no	no	others	DownCNV/PAV
GRMZM5G803308	GAGGGGGAGAGAGAGGAGGACGGC	ZmMYB112	GRMZM5G803308_T01	1349	1	-0.537	NA	others	9	97396868	97398308	+	myb112	MYB-transcription factor 112	assigned by the Grassius project, (Yilmaz et al 2009)	MYB transcription factor TaMYB1%3B Putative MYB DNA-binding domain superfamily protein	AT4G37260.1//ATMYB73,MYB73//myb domain protein 73	LOC_Os06g43090.1////MYB transcription factor TaMYB1, putative, expressed	0.000567312	no	yes	no	UpOnDS	noCNV
GRMZM2G060311	AATCCATGTGGATTGAGCGGGATT	NA	GRMZM2G060311_T01	878	1	-0.573	NA	NA	9	105442654	105443808	+	NA	NA	NA	Low temperature and salt responsive protein	AT4G28088.1////Low temperature and salt responsive protein family	LOC_Os06g44220.1////OsRCI2-9 - Putative low temperature and salt responsive protein, expressed	8.62e-05	no	no	no	others	noCNV
GRMZM2G151387	TGTTTGGGATTATAATCTGCC	NA	GRMZM2G151387_T02	2883	1	-0.465	NA	NA	9	119964620	119970211	-	NA	NA	NA	Putative SAP DNA-binding domain family protein isoform 1%3B Putative SAP DNA-binding domain family protein isoform 2	AT4G39680.1////SAP domain-containing protein	LOC_Os03g26630.1////SAP domain containing protein, expressed	0.215748	no	no	no	others	noCNV
GRMZM2G114312	GGCCGCAGCGGTGCCCCCTACAGC	NA	GRMZM2G114312_T02	545	0.5	-0.478	NA	NA	9	123126255	123130534	+	NA	NA	NA	Uncharacterized protein	AT1G54140.1//TAF9,TAFII21//TATA binding protein associated factor 21kDa subunit	LOC_Os03g29470.1////transcription initiation factor IID, putative, expressed	2.41e-05	no	no	no	UpOnDS	noCNV
GRMZM2G170843	CGCCTTGCACCAAGTGAAT	NA	GRMZM2G170843_T02	421	1	-0.526	zma-MIR168a	Gene miRNA	9	126274883	126281328	+	NA	NA	NA	Ubiquilin-1%3B Uncharacterized protein	AT2G17200.1//DSK2//ubiquitin family protein	LOC_Os10g39620.1////ubiquitin family protein, putative, expressed	0.395174	no	no	no	others	noCNV
GRMZM2G317584	AGAGCATCTCCAACAACGTGACCT	ZmEIL9	GRMZM2G317584_T01	19	0	-0.492	NA	NA	9	133469222	133473010	-	eil1	ethylene insensitive-like1	0	Uncharacterized protein	AT3G20770.1//AtEIN3,EIN3//Ethylene insensitive 3 family protein	LOC_Os03g20790.1////ethylene-insensitive 3, putative, expressed	0.01162	no	no	no	UpOnDS	noCNV
GRMZM5G888502	TCCAAACACGATCTCGTCGTCG	NA	GRMZM5G888502_T01	153	1	-0.515	NA	NA	9	135210621	135211946	+	NA	NA	NA	Uncharacterized protein	NA	NA	0.364969	no	no	no	others	noCNV
GRMZM2G045102	AGGACTTAGCCCTCTTCTTCCT	NA	GRMZM2G045102_T01	568	1	-0.54	NA	NA	9	140224919	140225939	-	NA	NA	NA	Uncharacterized protein	NA	LOC_Os03g16470.1////expressed protein	0.599517	no	no	no	others	noCNV
GRMZM2G036861	AATACTCGTGGCTCGATAACTCGC	NA	GRMZM2G036861_T05	157	0	-0.514	NA	NA	9	142191884	142198166	+	NA	NA	NA	Chorismate synthase	AT1G48850.1//EMB1144//chorismate synthase, putative / 5-enolpyruvylshikimate-3-phosphate phospholyase, putative	LOC_Os03g14990.1////chorismate synthase 2, chloroplast precursor, putative, expressed	7.25e-08	no	no	no	DownOnDS	noCNV
GRMZM2G081175	ACGGTTGGACTTAAACAAACACAA	NA	GRMZM2G081175_T01	1904	0.5	-0.45	NA	NA	9	143586090	143590243	+	NA	NA	NA	Uncharacterized protein	AT2G17840.1//ERD7//Senescence/dehydration-associated protein-related	LOC_Os03g13840.1////senescence-associated protein, putative, expressed	0.00293412	no	no	no	UpOnDS	noCNV
GRMZM2G115925	AAAGTTTGGATCTTTTAATGGTAT	NA	GRMZM2G115925_T01	70	0.5	-0.568	NA	NA	9	143864968	143869347	-	NA	NA	NA	Small nuclear ribonucleoprotein Sm D3%3B Uncharacterized protein	AT1G20580.1////Small nuclear ribonucleoprotein family protein	LOC_Os02g01250.1////LSM domain containing protein, expressed	0.0150335	no	no	no	DownOnDS	noCNV
GRMZM2G097812	ACATAAACACATAATCGGTTGAGT	NA	GRMZM2G097812_T01	2749	1	-0.578	NA	NA	9	144765866	144768894	+	NA	NA	NA	Uncharacterized protein	NA	NA	0.000251418	no	no	yes	UpOnDS	noCNV
GRMZM2G386923	TGAGTGCCCGTGCGTTGCAACGGA	NA	GRMZM2G386923_T01	2743	0	-0.535	NA	NA	9	147154850	147165216	+	NA	NA	NA	Uncharacterized protein	AT1G79190.1////ARM repeat superfamily protein	LOC_Os10g42510.1////expressed protein	0.127612	no	no	no	others	DownCNV/PAV
GRMZM5G846548	TTGTATAGCATCAGATCGATAGAA	NA	GRMZM5G846548_T02	2023	0	-0.658	NA	NA	9	147221321	147228145	+	NA	NA	NA	Uncharacterized protein	AT1G13770.1//RUS3//Protein of unknown function, DUF647	LOC_Os03g11500.1////DUF647 domain containing protein, putative, expressed	0.0499546	no	no	no	UpOnDS	noCNV
GRMZM2G004023	ATATAATACTGCAGTATTTGAGAA	NA	GRMZM2G004023_T03	1380	1	-0.559	NA	NA	9	150981931	150986131	-	NA	NA	NA	Uncharacterized protein	AT1G54150.1////E3 Ubiquitin ligase family protein	LOC_Os03g08000.1////expressed protein	0.569691	no	no	no	others	noCNV
GRMZM2G004023	CTGTTTGGGAACAAAGTTTTTGAA	NA	GRMZM2G004023_T04	1506	1	-0.585	NA	NA	9	150981931	150986131	-	NA	NA	NA	Uncharacterized protein	AT1G54150.1////E3 Ubiquitin ligase family protein	LOC_Os03g08000.1////expressed protein	0.569691	no	no	no	others	noCNV
GRMZM2G169365	ATACTTCAGTTTTGAAAACAGAGA	NA	GRMZM2G169365_T01	1874	0.5	-0.76	NA	NA	9	151083033	151087840	-	cnh1	carbon-nitrogen hydrolase homolog1	0	Uncharacterized protein	AT5G12040.1////Nitrilase/cyanide hydratase and apolipoprotein N-acyltransferase family protein	LOC_Os03g07910.1////nitrilase, putative, expressed	6.36e-08	no	no	no	UpOnDS	noCNV
GRMZM2G169365	AGTATTTGAGAATACTGCAGTATT	NA	GRMZM2G169365_T01	1808	1	-0.541	NA	NA	9	151083033	151087840	-	cnh1	carbon-nitrogen hydrolase homolog1	0	Uncharacterized protein	AT5G12040.1////Nitrilase/cyanide hydratase and apolipoprotein N-acyltransferase family protein	LOC_Os03g07910.1////nitrilase, putative, expressed	6.36e-08	no	no	no	UpOnDS	noCNV
GRMZM2G141121	TAATTTAGGGACTAAAATGGA	NA	GRMZM2G141121_T01	579	1	-0.571	NA	NA	9	151251111	151251789	+	NA	NA	NA	NA	NA	NA	NA	NA	NA	NA	NA	NA
GRMZM2G054969	GTCCGCGACCTGGCGCGAGGCGGC	NA	GRMZM2G054969_T03	1176	1	-0.551	NA	NA	9	151692156	151696804	-	NA	NA	NA	Uncharacterized protein	AT3G60070.1////Major facilitator superfamily protein	LOC_Os03g07170.1////lactose permease-related, putative, expressed	0.0416424	no	no	no	UpOnDS	DownCNV/PAV
GRMZM2G009869	AGTATATTTTATAGAATTTAGGGC	NA	GRMZM2G009869_T02	220	0	-0.622	NA	NA	9	151838501	151842903	+	NA	NA	NA	Uncharacterized protein	AT1G20650.1////Protein kinase superfamily protein	LOC_Os03g03880.1////protein kinase, putative, expressed	0.00302331	no	no	no	DownOnDS	noCNV
GRMZM2G009869	ACGGTGTAGTATATTTGAGTCACT	NA	GRMZM2G009869_T02	135	0	-0.526	NA	NA	9	151838501	151842903	+	NA	NA	NA	Uncharacterized protein	AT1G20650.1////Protein kinase superfamily protein	LOC_Os03g03880.1////protein kinase, putative, expressed	0.00302331	no	no	no	DownOnDS	noCNV
GRMZM2G127101	AGGCCCTGTTCCAATCTCGCGAGA	NA	GRMZM2G127101_T01	2133	0	-0.559	NA	NA	9	151906028	151911611	-	NA	NA	NA	Ubiquilin-1%3B Uncharacterized protein	AT2G17190.1////ubiquitin family protein	LOC_Os03g03920.1////Ubiquitin family domain containing protein, expressed	0.00202222	no	no	no	UpOnDS	noCNV
GRMZM2G172014	ATTTTTGTCTGAATATGTTGTGC	NA	GRMZM2G172014_T01	268	0.5	-0.46	NA	NA	9	153777111	153781389	-	NA	NA	NA	Putative leucine-rich repeat transmembrane protein kinase family protein	AT1G12460.1////Leucine-rich repeat protein kinase family protein	LOC_Os03g03570.2////leucine-rich repeat transmembrane protein kinase, putative, expressed	1.67e-06	no	no	no	DownOnDS	DownCNV/PAV
GRMZM2G180251	AGATCTGGAACTTGAAAGTGAAAT	NA	GRMZM2G180251_T01	471	0	-0.755	NA	NA	10	2118792	2122726	+	NA	NA	NA	Uncharacterized protein	NA	NA	4.47e-06	no	yes	yes	others	DownCNV/PAV
GRMZM2G180251	AGACTATGCGGATCTTCAGGCAGC	NA	GRMZM2G180251_T01	515	0	-0.751	NA	NA	10	2118792	2122726	+	NA	NA	NA	Uncharacterized protein	NA	NA	4.47e-06	no	yes	yes	others	DownCNV/PAV
GRMZM2G180251	CTTCAGGCAGCACCGGCGTAGAGC	NA	GRMZM2G180251_T01	502	0	-0.727	NA	NA	10	2118792	2122726	+	NA	NA	NA	Uncharacterized protein	NA	NA	4.47e-06	no	yes	yes	others	DownCNV/PAV
GRMZM2G180251	AGAGCACTTTTCAGATCTGGAACT	NA	GRMZM2G180251_T01	483	0	-0.699	NA	NA	10	2118792	2122726	+	NA	NA	NA	Uncharacterized protein	NA	NA	4.47e-06	no	yes	yes	others	DownCNV/PAV
GRMZM2G127393	GTTGGATTATATAATCTAGGTGGA	NA	GRMZM2G127393_T01	1948	1	-0.536	NA	NA	10	2657170	2665931	-	NA	NA	NA	Uncharacterized protein	AT5G55220.1////trigger factor type chaperone family protein	LOC_Os06g20320.1////peptidyl-prolyl cis-trans isomerase, FKBP-type, putative, expressed	0.135684	no	no	no	others	DownCNV/PAV
GRMZM2G051637	CAGCTTCGGATGCAGCTGAGTT	NA	GRMZM2G051637_T01	2972	1	-0.554	NA	NA	10	5591911	5595821	+	cr4	crinkly4	Classical Gene from J.S	Putative receptor protein kinase CRINKLY4	AT3G59420.1//ACR4,CR4//crinkly4	LOC_Os03g43670.1////TKL_IRAK_CR4L.1 - The CR4L subfamily has homology with Crinkly4, expressed	1.02e-11	no	yes	no	DownOnDS	noCNV
GRMZM2G439860	TGTTTGAATGCACTAGAGCTA	NA	GRMZM2G439860_T02	692	1	-0.599	NA	Gene rRNA	10	17835563	17837721	+	NA	NA	NA	Universal stress protein family protein	AT2G03720.1//MRH6//Adenine nucleotide alpha hydrolases-like superfamily protein	LOC_Os12g31710.1////universal stress protein domain containing protein, putative, expressed	0.0101929	no	no	no	DownOnDS	noCNV
GRMZM2G166686	AACCGTAGGTCGCTGTAAGTGAAC	NA	GRMZM2G166686_T01	1067	0	-0.54	NA	NA	10	27563045	27564793	-	NA	NA	NA	Uncharacterized protein	NA	NA	0.807249	no	no	no	others	noCNV
GRMZM2G166686	CTTTAGCGACGGCACTTACAGCGA	NA	GRMZM2G166686_T01	1159	0	-0.581	NA	NA	10	27563045	27564793	-	NA	NA	NA	Uncharacterized protein	NA	NA	0.807249	no	no	no	others	noCNV
GRMZM2G042995	CTAACCTAGTGTTACTCAGGCA	NA	GRMZM2G042995_T01	111	1	-0.675	NA	NA	10	37346572	37348590	-	NA	NA	NA	Uncharacterized protein	NA	NA	1.22e-05	no	no	no	UpOnDS	noCNV
GRMZM2G042995	CCAAGTCGACCCCAAGCGCGGG	NA	GRMZM2G042995_T01	222	0.5	-0.6	NA	NA	10	37346572	37348590	-	NA	NA	NA	Uncharacterized protein	NA	NA	1.22e-05	no	no	no	UpOnDS	noCNV
GRMZM2G471362	ATCCGATGGACGAAAAGCGAGCGC	NA	GRMZM2G471362_T01	1510	1	-0.591	NA	NA	10	48653940	48655784	+	NA	NA	NA	NA	NA	NA	NA	NA	NA	NA	NA	NA
GRMZM2G027750	GCGCGGACGGTCCGCGACCAGGGA	NA	GRMZM2G027750_T01	29	1	-0.588	NA	NA	10	72991838	72998734	-	NA	NA	NA	Uncharacterized protein	AT1G26830.1//ATCUL3,ATCUL3A,CUL3,CUL3A//cullin 3	LOC_Os08g07400.1////cullin, putative, expressed	0.0230329	no	no	no	UpOnDS	noCNV
GRMZM2G174736	AGGTTAGTTATTCAATTCGAACGA	NA	GRMZM2G174736_T01	1191	0	-0.509	NA	NA	10	95448560	95451686	-	NA	NA	NA	Basic salivary proline-rich protein 2 isoform 1%3B Basic salivary proline-rich protein 2 isoform 2%3B Uncharacterized protein	AT4G24500.1////hydroxyproline-rich glycoprotein family protein	LOC_Os02g30640.1////basic salivary proline-rich protein 2 precursor, putative, expressed	0.302383	no	no	no	others	noCNV
GRMZM2G126545	CCCTAGGGGATCCACGGGGGAGGA	NA	GRMZM2G126545_T01	210	1	-0.545	NA	NA	10	105058169	105069085	-	mbd113	methyl binding domain113	0	Uncharacterized protein	AT5G52230.1//MBD13//methyl-CPG-binding domain protein 13	LOC_Os04g19684.1////methyl-CpG binding domain containing protein, expressed	0.0190983	no	no	no	UpOnDS	noCNV
GRMZM2G032293	ATCTATACTACTTATTAAGAAGGT	NA	GRMZM2G032293_T01	1061	1	-0.599	NA	NA	10	105112606	105117051	-	NA	NA	NA	Uncharacterized protein	AT1G51610.1////Cation efflux family protein	LOC_Os04g23180.1////cation efflux family protein, putative, expressed	0.840897	no	no	no	others	noCNV
GRMZM2G355773	ACCCGTCGGGTACGGATATGGTGG	NA	GRMZM2G355773_T01	501	0	-0.454	NA	NA	10	116391903	116394321	+	NA	NA	NA	Histone H3.2	AT1G09200.1////Histone superfamily protein	LOC_Os04g34240.1////histone H3, putative, expressed	0.00472293	no	yes	no	DownOnDS	noCNV
GRMZM2G125233	AGTACACAGAAGCTCTATAGTGGC	NA	GRMZM2G125233_T02	13	1	-0.512	NA	NA	10	122246130	122248808	+	umc146	0	0	Uncharacterized protein	AT3G47800.1////Galactose mutarotase-like superfamily protein	LOC_Os04g38540.1////aldose 1-epimerase, putative, expressed	0.0188282	no	no	no	DownOnDS	DownCNV/PAV
GRMZM2G058573	TTGTTGGGTTTCAACTCTAGCC	ZmOrphan242	GRMZM2G058573_T07	611	0.5	-0.589	NA	NA	10	125923937	125946058	-	NA	NA	NA	Uncharacterized protein	AT5G55760.1//SRT1//sirtuin 1	LOC_Os04g20270.1////transcriptional regulator Sir2 family protein, putative, expressed	0.000540713	no	no	no	UpOnDS	noCNV
GRMZM2G005865	TCTAAACTCTGGAGCAGAGCTGCT	NA	GRMZM2G005865_T01	557	1	-0.546	NA	NA	10	126371077	126372000	-	NA	NA	NA	NA	NA	NA	0.318282	no	no	no	others	noCNV
GRMZM2G125452	GATTGGTGGGTCGGAACGATTCCT	NA	GRMZM2G125452_T03	673	0.5	-0.522	NA	NA	10	127994955	127997721	-	NA	NA	NA	Uncharacterized protein	AT5G15320.1////	LOC_Os04g02670.1////expressed protein	0.000333458	no	no	no	DownOnDS	noCNV
GRMZM2G175269	GGGAAGGGAGCTTCGAGGCGGC	NA	GRMZM2G175269_T01	148	1	-0.565	NA	NA	10	128436512	128439825	+	NA	NA	NA	Uncharacterized protein	AT5G57970.1////DNA glycosylase superfamily protein	LOC_Os04g42290.1////methyladenine glycosylase, putative, expressed	0.0771302	no	no	yes	others	noCNV
GRMZM2G000245	GATTCGGCCGCCATAACTGCGAGA	NA	GRMZM2G000245_T02	951	0	-0.561	NA	NA	10	128583776	128590953	-	NA	NA	NA	Uncharacterized protein	AT5G47690.3////binding	LOC_Os04g42320.1////AT hook motif family protein, expressed	0.01182	no	no	yes	UpOnDS	noCNV
GRMZM5G854655	ACATGGATTGAGAGCTAACCGAAC	NA	GRMZM5G854655_T01	1945	0	-0.514	NA	NA	10	131922231	131924319	+	NA	NA	NA	Cytokinin-O-glucosyltransferase 3	AT3G53150.1//UGT73D1//UDP-glucosyl transferase 73D1	LOC_Os04g44240.1////cytokinin-O-glucosyltransferase 3, putative, expressed	0.933971	no	no	no	others	noCNV
GRMZM2G040664	CCGGACGGTCCGCGCGTGCGCAGA	ZmEREB86	GRMZM2G040664_T01	26	0	-0.524	NA	NA	10	132343963	132345739	-	ereb86	AP2-EREBP-transcription factor 86	assigned by the Grassius project, (Yilmaz et al 2009)	NA	NA	NA	NA	NA	NA	NA	NA	NA
GRMZM2G102860	GCCCCGCCTGGCCGAACTGAAGGA	NA	GRMZM2G102860_T01	323	1	-0.561	NA	NA	10	134016791	134017480	+	NA	NA	NA	Uncharacterized protein	NA	NA	0.722348	no	no	no	others	noCNV
GRMZM2G102860	CGGGCTGGAGCTCGCGACAACAGC	NA	GRMZM2G102860_T01	32	0.5	-0.571	NA	NA	10	134016791	134017480	+	NA	NA	NA	Uncharacterized protein	NA	NA	0.722348	no	no	no	others	noCNV
GRMZM2G102860	AGATACGATTGGTGAGTTGAGCGA	NA	GRMZM2G102860_T01	393	0	-0.489	NA	NA	10	134016791	134017480	+	NA	NA	NA	Uncharacterized protein	NA	NA	0.722348	no	no	no	others	noCNV
GRMZM2G017414	AGAGCAACAGTCTAGCTGCTAACT	NA	GRMZM2G017414_T01	3234	0	-0.483	NA	NA	10	137189044	137195761	+	NA	NA	NA	Putative HLH DNA-binding domain superfamily protein%3B Uncharacterized protein	AT2G27230.1//LHW//transcription factor-related	LOC_Os02g45170.1////helix-loop-helix DNA-binding protein, putative, expressed	0.0448453	no	no	no	UpOnDS	noCNV
GRMZM2G145480	CACGCACGCAGGGTCACCGGC	NA	GRMZM2G145480_T01	222	0.5	-0.537	NA	NA	10	142015991	142017755	+	NA	NA	NA	Uncharacterized protein	AT3G14580.1////Pentatricopeptide repeat (PPR) superfamily protein	LOC_Os04g52725.1////PPR repeat domain containing protein, putative, expressed	0.40467	no	no	no	others	noCNV
GRMZM2G117531	AATCATGTTTTTGAGGACCTTCGG	NA	GRMZM2G117531_T01	1415	0	-0.604	NA	NA	10	144548085	144553572	-	NA	NA	NA	Uncharacterized protein	AT1G52510.1////alpha/beta-Hydrolases superfamily protein	LOC_Os04g55180.1////hydrolase, alpha/beta fold family domain containing protein, expressed	0.328079	no	no	no	others	noCNV
GRMZM2G004924	GAGAGAAAGAGAGGAAGGA	NA	GRMZM2G004924_T01	3026	1	-0.463	NA	NA	10	145173827	145178977	+	NA	NA	NA	Uncharacterized protein	AT3G54710.1//ATCDT1B,CDT1,CDT1B//homolog of yeast CDT1 B homolog of yeast CDT1 B	LOC_Os10g34820.1////CDT1B - Putative DNA replication initiation protein, expressed	0.0432818	no	yes	no	DownOnDS	noCNV
GRMZM2G066981	TGTTTGAATGCACTAGAGCTA	NA	GRMZM2G066981_T06	1244	1	-0.677	NA	Gene rRNA	10	146110506	146116814	-	NA	NA	NA	Uncharacterized protein	AT5G03500.1////Mediator complex, subunit Med7	LOC_Os04g56640.1////mediator of RNA polymerase II transcription subunit 7, putative, expressed	0.0868094	no	no	no	others	noCNV
GRMZM2G008730	TATATGCCCGTGCGTTGCTACGGA	NA	GRMZM2G008730_T01	1435	1	-0.519	NA	NA	10	146160923	146163640	+	NA	NA	NA	Uncharacterized protein	AT3G59540.1////Ribosomal L38e protein family	LOC_Os11g24610.1////60S ribosomal protein L38, putative, expressed	0.86308	no	no	no	others	noCNV

## Sheet: sRNA-DRG pairs
Table S7b. Negatively correlated sRNA-DRG pairs.
GeneID	sRNA	TF	Transcript	Target_Pos	psRNATarget Score	Correlation between sRNA and DRG	miRNA_perfect_hits	Group	chr	start	end	strand	Gene Symbol	Full Name	Source	gene_description	a.th_ortholog	rice_ortholog	interaction.padj	early DRG	middle DRG	late DRG	Regulation on drought	CNV
GRMZM2G059428	TCGGCTGCTAGTTTCTACAGTGGC	ZmNAC53	GRMZM2G059428_T03	879	0	-0.472	NA	NA	1	7483453	7485519	-	nactf53	NAC-transcription factor 53	assigned by the Grassius project, (Yilmaz et al 2009)	NA	AT2G17040.1//anac036,NAC036//NAC domain containing protein 36	LOC_Os03g04070.1////no apical meristem protein, putative, expressed	0.000101818	yes	yes	no	others	noCNV
GRMZM2G076062	ATCCCAACGAACGAACGATTTGAA	NA	GRMZM2G076062_T02	277	1	-0.598	NA	NA	1	12162857	12167581	-	umc2224	0	0	Uncharacterized protein	AT3G13460.1//ECT2//evolutionarily conserved C-terminal region 2	LOC_Os03g06240.1////YT521-B-like family domain containing protein, expressed	0.00109481	no	no	no	uDRG	noCNV
GRMZM2G093125	GTAGACGCCACCAACATTAGCGGA	NA	GRMZM2G093125_T01	1626	0	-0.542	NA	NA	1	17854846	17856744	+	NA	NA	NA	Tyrosine/DOPA decarboxylase 2	AT2G20340.1////Pyridoxal phosphate (PLP)-dependent transferases superfamily protein	LOC_Os01g56380.1////decarboxylase, putative, expressed	0.00389339	no	no	no	dDRG	noCNV
GRMZM2G050514	GTTTTAGTTGTCGCTGGATAGTGC	NA	GRMZM2G050514_T01	1460	0.5	-0.56	NA	NA	1	27978351	27982007	-	gln3	glutamine synthetase3	Classical Gene from J.S	Glutamine synthetase root isozyme 1	AT5G37600.1//ATGLN1;1,ATGSR1,GLN1;1,GSR 1//glutamine synthase clone R1	LOC_Os03g12290.1////glutamine synthetase, catalytic domain containing protein, expressed	0.0372035	no	no	yes	dDRG	noCNV
GRMZM2G135877	CGCGAGGTCGGCCGACGAGGGA	NA	GRMZM2G135877_T01	568	1	-0.688	NA	NA	1	29789597	29791722	+	NA	NA	NA	Antiporter/ drug transporter/ transporter	AT1G58340.1//ZF14//MATE efflux family protein	LOC_Os03g12790.1////MATE efflux family protein, putative, expressed	5.07e-05	no	no	no	uDRG	noCNV
GRMZM2G110023	ATTAGTCTCTAGAAACCAAACACC	NA	GRMZM2G110023_T01	1080	1	-0.598	NA	NA	1	33830201	33835912	-	NA	NA	NA	ATP-dependent Clp protease ATP-binding subunit clpA%3B Uncharacterized protein	AT4G12060.1////Double Clp-N motif protein	LOC_Os03g14280.1////ATP-dependent Clp protease ATP-binding subunit, putative, expressed	0.000754348	no	no	yes	dDRG	noCNV
GRMZM5G849959	AAGAAGAACCGGCGGCGGTGCTCT	NA	GRMZM5G849959_T02	279	0	-0.524	NA	NA	1	57837766	57842932	-	NA	NA	NA	Sentrin-specific protease 2	AT4G15880.1//ATESD4,ESD4//Cysteine proteinases superfamily protein	LOC_Os03g22400.1////ulp1 protease family protein, putative, expressed	0.00204901	no	no	no	uDRG	noCNV
GRMZM2G108416	ACTAAAACAAACATGATTTAACGT	NA	GRMZM2G108416_T01	2137	0.5	-0.477	NA	NA	1	62434950	62454927	-	NA	NA	NA	Aminotransferase%2C class IV family protein	AT5G27410.2////D-aminoacid aminotransferase-like PLP-dependent enzymes superfamily protein	LOC_Os03g24460.2////aminotransferase domain containing protein, putative, expressed	0.0176063	no	no	no	uDRG	noCNV
GRMZM2G023325	AATAACTTCCTTATTTTCGTGGGC	NA	GRMZM2G023325_T01	848	0	-0.485	NA	NA	1	66506457	66507471	+	bx12	benzoxazinone synthesis12	from Meihls et al 2013	NA	AT4G35160.1////O-methyltransferase family protein	LOC_Os12g25450.1////O-methyltransferase, putative, expressed	2.56e-05	no	no	yes	others	noCNV
GRMZM2G068826	AGCCTTTGGACTACACTCGGTAGC	NA	GRMZM2G068826_T01	777	0.5	-0.548	NA	NA	1	76022799	76023952	-	NA	NA	NA	Putative uncharacterized protein	NA	LOC_Os07g03020.1////expressed protein	0.000340251	no	no	yes	others	noCNV
GRMZM5G873519	GGTACGGAGGGACGGAGGAGGCT	NA	GRMZM5G873519_T01	261	1	-0.591	NA	NA	1	105237264	105239945	-	NA	NA	NA	Uncharacterized protein	AT1G32080.1////membrane protein, putative	LOC_Os10g42780.1////lrgB-like family protein, expressed	0.0194371	no	no	yes	dDRG	noCNV
GRMZM2G424181	GATTGGATGGGTTTGAATCCCAAA	NA	GRMZM2G424181_T01	3836	1	-0.487	NA	NA	1	149555585	149563220	+	NA	NA	NA	NA	AT4G24680.1//MOS1//modifier of snc1	LOC_Os12g37860.1////expressed protein	2.23e-05	no	no	yes	uDRG	noCNV
GRMZM2G071987	GATTTGGTCATGATTTATATTCGG	NA	GRMZM2G071987_T01	1191	0.5	-0.464	NA	NA	1	172207302	172209234	-	NA	NA	NA	Cell-cell signaling protein csgA-like	AT4G20760.1////NAD(P)-binding Rossmann-fold superfamily protein	LOC_Os12g41590.1////oxidoreductase, short chain dehydrogenase/reductase family domain containing protein, expressed	0.0195734	no	no	no	dDRG	noCNV
GRMZM2G151236	ATTAGAGAAGCAATCCGGTTAGGA	NA	GRMZM2G151236_T02	1035	1	-0.699	NA	NA	1	180854373	180864776	-	NA	NA	NA	Uncharacterized protein	AT3G25840.1////Protein kinase superfamily protein	LOC_Os12g44330.1////serine/threonine-protein kinase PRP4, putative, expressed	2.54e-05	no	no	yes	uDRG	noCNV
GRMZM2G151236	ACAAAGTTTATATAAATTAGAGAA	NA	GRMZM2G151236_T03	3330	1	-0.669	NA	NA	1	180854373	180864776	-	NA	NA	NA	Uncharacterized protein	AT3G25840.1////Protein kinase superfamily protein	LOC_Os12g44330.1////serine/threonine-protein kinase PRP4, putative, expressed	2.54e-05	no	no	yes	uDRG	noCNV
GRMZM2G151236	ATTGCACCCGGAATCGTTCCAGCT	NA	GRMZM2G151236_T02	1076	0.5	-0.769	NA	NA	1	180854373	180864776	-	NA	NA	NA	Uncharacterized protein	AT3G25840.1////Protein kinase superfamily protein	LOC_Os12g44330.1////serine/threonine-protein kinase PRP4, putative, expressed	2.54e-05	no	no	yes	uDRG	noCNV
GRMZM2G080912	AGAGTGTTCTGTAAAGGACAGAGA	NA	GRMZM2G080912_T01	1939	0	-0.727	NA	NA	1	184041593	184046827	-	NA	NA	NA	Uncharacterized protein	AT2G44200.1////CBF1-interacting co-repressor CIR, N-terminal;Pre-mRNA splicing factor	LOC_Os08g39090.1////coiled-coil domain containing 49, putative, expressed	1.32e-10	no	no	yes	uDRG	noCNV
GRMZM2G085249	AATGCTTCGAAGGACGAAGGACTT	NA	GRMZM2G085249_T01	1551	0	-0.726	NA	NA	1	218147403	218155498	+	aprl5	adenosine 5'-phosphosulfate reductase-like5	0	Uncharacterized protein	AT1G34780.1//APRL4,ATAPRL4//APR-like 4	LOC_Os08g31814.1////OsAPRL4 adenosine 5\'-phosphosulfate reductase-like OsAPRL4, expressed	0.00281152	no	no	no	uDRG	noCNV
GRMZM2G085249	AGACATGTATCTTGACGAAGACAC	NA	GRMZM2G085249_T02	948	1	-0.618	NA	NA	1	218147403	218155498	+	aprl5	adenosine 5'-phosphosulfate reductase-like5	0	Uncharacterized protein	AT1G34780.1//APRL4,ATAPRL4//APR-like 4	LOC_Os08g31814.1////OsAPRL4 adenosine 5\'-phosphosulfate reductase-like OsAPRL4, expressed	0.00281152	no	no	no	uDRG	noCNV
GRMZM2G085249	TGTGTTTATGAAGGTATGTCCT	NA	GRMZM2G085249_T01	1617	0.5	-0.457	NA	NA	1	218147403	218155498	+	aprl5	adenosine 5'-phosphosulfate reductase-like5	0	Uncharacterized protein	AT1G34780.1//APRL4,ATAPRL4//APR-like 4	LOC_Os08g31814.1////OsAPRL4 adenosine 5\'-phosphosulfate reductase-like OsAPRL4, expressed	0.00281152	no	no	no	uDRG	noCNV
GRMZM2G318882	TCGAGCTCCAGCACCATGTGC	NA	GRMZM2G318882_T01	655	0	-0.648	NA	Gene snRNA snoRNA	1	222596581	222597546	+	NA	NA	NA	Disease resistance response protein 206	AT5G42510.1////Disease resistance-responsive (dirigent-like protein) family protein	LOC_Os07g01620.1////dirigent, putative, expressed	0.00129337	no	no	no	others	noCNV
GRMZM2G079428	AGACTGGACTGGCTGAGTGCATGC	NA	GRMZM2G079428_T04	70	0	-0.503	NA	NA	1	229910587	229926888	-	NA	NA	NA	NA	AT4G33630.1//EX1//Protein of unknown function (DUF3506)	LOC_Os10g34400.1////expressed protein	0.000229832	no	no	no	uDRG	noCNV
GRMZM2G079428	ACTGTTTGCAGAGTAGAGTTTGAA	NA	GRMZM2G079428_T05	2931	0	-0.521	NA	NA	1	229910587	229926888	-	NA	NA	NA	NA	AT4G33630.1//EX1//Protein of unknown function (DUF3506)	LOC_Os10g34400.1////expressed protein	0.000229832	no	no	no	uDRG	noCNV
GRMZM2G143883	ACTATCCAGCGACAACTAAAACGA	NA	GRMZM2G143883_T01	305	0	-0.545	NA	NA	1	232462370	232467510	+	NA	NA	NA	Uncharacterized protein	AT3G23410.1//ATFAO3,FAO3//fatty alcohol oxidase 3	LOC_Os10g33460.1////alcohol oxidase, putative, expressed	0.000148693	no	no	yes	dDRG	noCNV
GRMZM2G352695	TGAGGCACTGTTGCGCGCTCCAGC	NA	GRMZM2G352695_T01	116	0.5	-0.489	NA	NA	1	254862420	254868235	-	NA	NA	NA	Uncharacterized protein	AT4G37640.1//ACA2//calcium ATPase 2	LOC_Os03g42020.1////calcium-transporting ATPase, plasma membrane-type, putative, expressed	6.72e-05	no	no	no	uDRG	noCNV
GRMZM2G323838	GAGGGGGAGAGAGAGGAGGACGGC	NA	GRMZM2G323838_T01	442	1	-0.56	NA	others	1	264021497	264031738	+	NA	NA	NA	NA	AT5G14520.1////pescadillo-related	LOC_Os03g49210.1////BRCA1 C Terminus domain containing protein, expressed	0.0199067	no	no	yes	uDRG	noCNV
GRMZM2G004160	AGGGGCATGCAGAGGAGGAGC	NA	GRMZM2G004160_T02	168	1	-0.56	zma-MIR528a	NA	1	267227977	267228945	-	NA	NA	NA	Chemocyanin%3B Uncharacterized protein	AT2G02850.1//ARPN//plantacyanin	LOC_Os03g50160.1////plastocyanin-like domain containing protein, putative, expressed	3.06e-13	no	yes	no	uDRG	noCNV
GRMZM2G023110	TGGATCAATAAGAGTGGTAGCT	NA	GRMZM2G023110_T01	1805	1	-0.729	NA	others	1	267933161	267936681	-	NA	NA	NA	Atypical receptor-like kinase MARK	AT1G48480.1//RKL1//receptor-like kinase 1	LOC_Os03g50450.1////inactive receptor kinase At2g26730 precursor, putative, expressed	0.000956764	no	no	no	dDRG	noCNV
GRMZM2G024104	CCAATCCCATCCAATCCATGTGTA	NA	GRMZM2G024104_T05	778	0.5	-0.68	NA	NA	1	267960169	267963551	-	gln2	glutamine synthetase2	Classical Gene from J.S	Glutamine synthetase root isozyme 2	AT1G66200.3//ATGSR2,GSR2//glutamine synthase clone F11	LOC_Os03g50490.1////glutamine synthetase, catalytic domain containing protein, expressed	2.5e-11	yes	no	no	uDRG	noCNV
GRMZM2G157727	AGCTTCTGCAGCAGCTTATCAGTT	NA	GRMZM2G157727_T01	1172	1	-0.518	NA	NA	1	269388274	269395277	-	phyA1	phytochromeA1	Classical Gene from J.S	Phytochrome	AT1G09570.1//FHY2,FRE1,HY8,PHYA//phytochrome A	LOC_Os03g51030.1////phytochrome A, putative, expressed	6.47e-12	no	yes	no	uDRG	noCNV
GRMZM2G149952	TGAAGTGTTTGGGGGAACTC	NA	GRMZM2G149952_T01	453	0.5	-0.603	zma-MIR395p,zma-MIR395o,zma-MIR395n,zma-MIR395j,zma-MIR395i,zma-MIR395h,zma-MIR395g,zma-MIR395f,zma-MIR395e,zma-MIR395d,zma-MIR395a,zma-MIR395b	Gene miRNA	1	275157705	275161519	-	aps1	ATP sulfurylase1	from: EU973074	Uncharacterized protein	AT4G14680.1//APS3//Pseudouridine synthase/archaeosine transglycosylase-like family protein	LOC_Os03g53230.1////bifunctional 3-phosphoadenosine 5-phosphosulfate synthetase, putative, expressed	0.0138899	no	yes	no	uDRG	noCNV
GRMZM2G464782	AGATACCTGTTCACACATTATACT	NA	GRMZM2G464782_T02	1025	1	-0.568	NA	NA	1	277099198	277112873	+	NA	NA	NA	Putative uncharacterized protein	AT2G39950.1////	LOC_Os07g01060.1////expressed protein	6.79e-05	no	no	no	uDRG	DownCNV/PAV
GRMZM2G107798	AGCAGTCTTTTATGTTTTGTTA	NA	GRMZM2G107798_T01	2025	1	-0.635	NA	NA	1	280568776	280571672	-	NA	NA	NA	Peptidase/ serine-type peptidase	AT1G06870.1////Peptidase S24/S26A/S26B/S26C family protein	LOC_Os03g55640.1////OsSigP2 - Putative Type I Signal Peptidase homologue; employs a putative Ser/Lys catalytic dyad, expressed	0.0187127	no	no	no	dDRG	noCNV
GRMZM2G067964	CTGGCTCCCGCTGCCCGCAGGC	NA	GRMZM2G067964_T02	294	1	-0.478	NA	NA	1	282939188	282940987	+	NA	NA	NA	Uncharacterized protein	AT1G48140.1////dolichol-phosphate mannosyltransferase-related	LOC_Os02g51420.1////expressed protein	0.0426957	no	no	no	uDRG	noCNV
GRMZM2G067964	GCGGCGCGACCGTCTTGGTGGA	NA	GRMZM2G067964_T02	326	0.5	-0.472	NA	NA	1	282939188	282940987	+	NA	NA	NA	Uncharacterized protein	AT1G48140.1////dolichol-phosphate mannosyltransferase-related	LOC_Os02g51420.1////expressed protein	0.0426957	no	no	no	uDRG	noCNV
GRMZM2G045005	ACCGTCTTGGTGGAGCAGCGGC	NA	GRMZM2G045005_T01	509	0.5	-0.45	NA	NA	2	38044187	38048031	+	tgz21	transglutaminase21	from: AJ488103	Uncharacterized protein	AT1G67170.1////	LOC_Os04g40300.1////transglutaminase, putative, expressed	1.87e-05	no	no	no	uDRG	noCNV
GRMZM2G355906	TCCACTGCACAACTTTATGGTG	NA	GRMZM2G355906_T04	1037	0	-0.493	NA	NA	2	45349199	45380559	-	NA	NA	NA	Uncharacterized protein	AT1G65960.2//GAD2//glutamate decarboxylase 2	LOC_Os04g37500.1////glutamate decarboxylase, putative, expressed	1.29e-22	no	no	yes	dDRG	noCNV
GRMZM2G355906	TTTTGTCCCAGATCGATTGATT	NA	GRMZM2G355906_T04	1612	0	-0.473	NA	NA	2	45349199	45380559	-	NA	NA	NA	Uncharacterized protein	AT1G65960.2//GAD2//glutamate decarboxylase 2	LOC_Os04g37500.1////glutamate decarboxylase, putative, expressed	1.29e-22	no	no	yes	dDRG	noCNV
GRMZM2G355906	CCTTAACAAGCTCGCAGACGTC	NA	GRMZM2G355906_T03	499	0	-0.692	NA	NA	2	45349199	45380559	-	NA	NA	NA	Uncharacterized protein	AT1G65960.2//GAD2//glutamate decarboxylase 2	LOC_Os04g37500.1////glutamate decarboxylase, putative, expressed	1.29e-22	no	no	yes	dDRG	noCNV
GRMZM2G355906	TGAAGGACCCCAAGAAGAGATT	NA	GRMZM2G355906_T04	1	0	-0.685	NA	NA	2	45349199	45380559	-	NA	NA	NA	Uncharacterized protein	AT1G65960.2//GAD2//glutamate decarboxylase 2	LOC_Os04g37500.1////glutamate decarboxylase, putative, expressed	1.29e-22	no	no	yes	dDRG	noCNV
GRMZM2G074083	ACCTGTATATGGTAGATGTTGGTT	NA	GRMZM2G074083_T01	1099	0	-0.493	NA	NA	2	110572278	110574210	+	NA	NA	NA	Uncharacterized protein	NA	LOC_Os04g05010.1////CBS domain containing membrane protein, putative, expressed	0.047073	no	no	yes	others	noCNV
GRMZM2G103345	AGCTTCTTCACAAATTTAAGCAGA	NA	GRMZM2G103345_T02	2744	0	-0.511	NA	NA	2	165895809	165900280	-	NA	NA	NA	NA	AT3G10770.1////Single-stranded nucleic acid binding R3H protein	LOC_Os09g39462.1////nucleic acid binding protein, putative, expressed	0.015345	no	no	no	uDRG	noCNV
GRMZM2G164945	ATTTTACAGTTTCATTTACAGGTT	NA	GRMZM2G164945_T01	1913	0	-0.506	NA	NA	2	194814425	194816502	-	NA	NA	NA	NA	AT2G28100.1//ATFUC1,FUC1//alpha-L-fucosidase 1	LOC_Os09g34920.1////glycosyl hydrolase family 29, putative, expressed	0.000160238	no	no	yes	dDRG	noCNV
GRMZM2G001820	CTGGAGAAGGTGTTGTATGCCG	NA	GRMZM2G001820_T01	1264	1	-0.513	NA	NA	2	203790979	203797876	+	NA	NA	NA	Uncharacterized protein	AT5G57700.3////BNR/Asp-box repeat family protein	LOC_Os07g33220.1////BNR/Asp-box repeat family protein, putative, expressed	9.08e-09	no	no	no	dDRG	noCNV
GRMZM2G038519	GTCGATTAGAGGAGTCTAGGTCGG	NA	GRMZM2G038519_T03	938	0	-0.47	NA	NA	2	207611861	207618663	+	lhca1	light harvesting complex A1	from: Entrez Gene 100191715	Chlorophyll a-b binding protein	AT3G61470.1//LHCA2//photosystem I light harvesting complex gene 2	LOC_Os07g38960.1////chlorophyll A-B binding protein, putative, expressed	0.0366821	no	no	yes	dDRG	noCNV
GRMZM2G075002	AGCAAGTTGGGGTAGGCTAGAG	NA	GRMZM2G075002_T02	650	0	-0.466	NA	NA	2	213830471	213835107	-	NA	NA	NA	CBL-interacting serine/threonine-protein kinase 1	AT3G17510.1//CIPK1,SnRK3.16//CBL-interacting protein kinase 1	LOC_Os07g44290.1////CAMK_KIN1/SNF1/Nim1_like.29 - CAMK includes calcium/calmodulin depedent protein kinases, expressed	0.000188137	no	no	yes	others	noCNV
GRMZM2G401511	ATAGACACTCCATTGTACAATAGA	NA	GRMZM2G401511_T01	1398	0	-0.5	NA	NA	2	222319674	222321136	+	NA	NA	NA	Plant-specific domain TIGR01627 family protein	AT1G67330.1////Protein of unknown function (DUF579)	LOC_Os11g29780.1////plant-specific domain TIGR01627 family protein, expressed	0.00111413	no	no	yes	uDRG	noCNV
GRMZM2G104081	GGTCGTGGTCGTGGCCGAGGGA	NA	GRMZM2G104081_T02	50	1	-0.692	NA	NA	3	7079526	7083312	+	hex1	hexokinase1	from EU971594 & Zhou et al., 2014; Zhang et al., 2014	Uncharacterized protein	AT4G29130.1//ATHXK1,GIN2,HXK1//hexokinase 1	LOC_Os01g09460.1////hexokinase, putative, expressed	2.08e-16	no	yes	no	uDRG	noCNV
GRMZM2G009282	GGGCTTTTGAGATTTTCCTGGGAT	NA	GRMZM2G009282_T01	3320	1	-0.57	NA	NA	3	22821827	22827568	-	NA	NA	NA	Uncharacterized protein	AT1G68560.1//ATXYL1,TRG1,XYL1//alpha-xylosidase 1	LOC_Os01g03950.1////glycosyl hydrolase, family 31, putative, expressed	5.42e-09	no	yes	no	dDRG	noCNV
GRMZM2G119894	CCCGCCGGCGAGCGCTTTCCT	NA	GRMZM2G119894_T01	1620	1	-0.479	NA	NA	3	50094925	50101424	-	NA	NA	NA	NA	AT1G02520.1//PGP11//P-glycoprotein 11	LOC_Os01g74630.1////expressed protein	0.0093854	no	no	no	dDRG	noCNV
GRMZM2G381138	ACAGCTGCATGTCTAGAGGTAGAG	NA	GRMZM2G381138_T01	547	0	-0.59	NA	NA	3	62971224	62974408	+	NA	NA	NA	Uncharacterized protein	NA	NA	3.17e-05	no	no	no	uDRG	noCNV
GRMZM2G147811	ACATGGATTGAGAGCTAACCGAAC	NA	GRMZM2G147811_T02	4162	0	-0.544	NA	NA	3	95873973	95885088	-	NA	NA	NA	NA	AT3G25840.1////Protein kinase superfamily protein	LOC_Os12g44330.1////serine/threonine-protein kinase PRP4, putative, expressed	6.45e-05	no	no	yes	uDRG	noCNV
GRMZM2G082203	TAGAGGGCAGATATGTAGGCGT	NA	GRMZM2G082203_T02	39	0.5	-0.711	NA	NA	3	128114749	128119422	+	rte2	rotten ear2	0	Uncharacterized protein	AT2G47160.1//BOR1//HCO3- transporter family	LOC_Os12g37840.2////boron transporter protein, putative, expressed	5.22e-21	no	yes	no	dDRG	noCNV
GRMZM2G418515	GATTGGATGGGTTTGAATCCCAAA	NA	GRMZM2G418515_T01	4355	1	-0.457	NA	NA	3	128250845	128259096	+	NA	NA	NA	NA	AT4G24680.1//MOS1//modifier of snc1	LOC_Os12g37860.1////expressed protein	1.98e-10	no	no	yes	uDRG	noCNV
GRMZM2G310069	TGTCCGGACCGCGGACCGTCCGGC	NA	GRMZM2G310069_T01	1769	1	-0.692	NA	NA	3	148137416	148141339	-	NA	NA	NA	Uncharacterized protein	AT3G55850.1//LAF3,LAF3 ISF1,LAF3 ISF2//Amidohydrolase family	LOC_Os01g72350.1////amidohydrolase, putative, expressed	1.98e-12	no	no	no	uDRG	noCNV
GRMZM2G011731	AGAGAAGTAATCCGGCTAGGAATT	NA	GRMZM2G011731_T01	1301	0.5	-0.478	NA	NA	3	170588963	170591516	+	NA	NA	NA	Putative uncharacterized protein	AT4G10080.1////	LOC_Os01g66150.1////expressed protein	0.0308712	no	yes	no	uDRG	noCNV
GRMZM2G011731	GTTGTACCGGAATGAGCCAGGATT	NA	GRMZM2G011731_T01	1355	0	-0.607	NA	NA	3	170588963	170591516	+	NA	NA	NA	Putative uncharacterized protein	AT4G10080.1////	LOC_Os01g66150.1////expressed protein	0.0308712	no	yes	no	uDRG	noCNV
GRMZM2G357399	CAGTATTTATAGCATTGGGGTT	NA	GRMZM2G357399_T02	410	1	-0.461	NA	NA	3	186634201	186637449	-	NA	NA	NA	ADP-ribosylation factor%3B Uncharacterized protein	AT2G47170.1//ARF1A1C//Ras-related small GTP-binding family protein	LOC_Os07g12170.1////ADP-ribosylation factor, putative, expressed	0.00110934	no	no	no	dDRG	noCNV
GRMZM2G085005	ATTGGAAAAAATTGTGAAGAAGTT	NA	GRMZM2G085005_T03	959	1	-0.579	NA	NA	3	189711783	189713780	+	NA	NA	NA	Partner of Nob1%3B Uncharacterized protein	AT3G13230.1////RNA-binding KH domain-containing protein	LOC_Os01g57910.1////KH domain containing protein, putative, expressed	8.58e-05	no	no	no	uDRG	DownCNV/PAV
GRMZM2G082745	ACTCTATCCAACAATTCTCCGCGG	NA	GRMZM2G082745_T03	276	1	-0.608	NA	NA	3	191054033	191064203	+	NA	NA	NA	ULT transcription factor%3B Uncharacterized protein	AT4G28190.1//ULT,ULT1//Developmental regulator, ULTRAPETALA	LOC_Os01g57240.1////expressed protein	0.00470195	no	no	no	dDRG	noCNV
GRMZM2G582965	GACAGTGGCGCGGAAGAGGGGC	NA	GRMZM2G582965_T01	290	0	-0.495	NA	NA	3	192844995	192851611	-	NA	NA	NA	Uncharacterized protein	AT2G28380.1//DRB2//dsRNA-binding protein 2	LOC_Os01g56520.1////double-stranded RNA binding motif containing protein, expressed	9.18e-09	no	no	yes	uDRG	noCNV
GRMZM2G156877	GTTTGGTTTCTTTAGTCTAGGGAC	NA	GRMZM2G156877_T03	1055	0.5	-0.465	NA	NA	3	194233310	194235176	+	gst8	glutathione transferase8	0	Glutathione S-transferase IV%3B Uncharacterized protein	AT3G62760.1//ATGSTF13//Glutathione S-transferase family protein	LOC_Os01g27210.1////glutathione S-transferase, putative, expressed	7.29e-07	yes	no	no	others	noCNV
GRMZM2G122072	TTGTGTTCTTTCGAGCTCTTGCGC	NA	GRMZM2G122072_T01	3132	0	-0.579	NA	NA	3	200282333	200292465	-	NA	NA	NA	Uncharacterized protein	AT1G05230.1//HDG2//homeodomain GLABROUS 2	LOC_Os04g53540.4////homeobox and START domains containing protein, putative, expressed	0.000257014	no	yes	no	others	DownCNV/PAV
GRMZM2G122072	GGAGGAGGTGGAGGGTGGTGGT	NA	GRMZM2G122072_T01	318	1	-0.628	NA	NA	3	200282333	200292465	-	NA	NA	NA	Uncharacterized protein	AT1G05230.1//HDG2//homeodomain GLABROUS 2	LOC_Os04g53540.4////homeobox and START domains containing protein, putative, expressed	0.000257014	no	yes	no	others	DownCNV/PAV
GRMZM2G122072	AAGAGCTCTAGCATTCAATTCTAG	NA	GRMZM2G122072_T01	3225	0.5	-0.607	NA	NA	3	200282333	200292465	-	NA	NA	NA	Uncharacterized protein	AT1G05230.1//HDG2//homeodomain GLABROUS 2	LOC_Os04g53540.4////homeobox and START domains containing protein, putative, expressed	0.000257014	no	yes	no	others	DownCNV/PAV
GRMZM2G037322	CCTGCTGCTGCTGTTGCTCCT	NA	GRMZM2G037322_T02	386	1	-0.567	NA	NA	3	216027343	216029894	+	NA	NA	NA	Catalytic/ hydrolase	AT2G18360.1////alpha/beta-Hydrolases superfamily protein	LOC_Os01g44960.1////hydrolase, alpha/beta fold family domain containing protein, expressed	1.36e-08	no	no	yes	dDRG	noCNV
GRMZM2G393002	AGTGCACAGGCTGTAGCAGGCTAT	NA	GRMZM2G393002_T01	3595	0.5	-0.536	NA	NA	4	11067547	11092372	+	NA	NA	NA	Putative alpha-L-arabinofuranosidase family protein	AT3G10740.1//ARAF,ARAF1,ASD1,ATASD1//alpha-L-arabinofuranosidase 1	LOC_Os11g03730.1////alpha-N-arabinofuranosidase A, putative, expressed	0.00217068	no	no	no	others	noCNV
GRMZM5G840928	CATGCGCTCGTGGGCCGGCCCAGC	NA	GRMZM5G840928_T03	119	1	-0.496	NA	NA	4	14592668	14597328	-	NA	NA	NA	ATP-dependent (S)-NAD(P)H-hydrate dehydratase	AT5G19150.1////pfkB-like carbohydrate kinase family protein	LOC_Os11g17610.1////expressed protein	5.66e-13	no	no	yes	uDRG	noCNV
GRMZM2G030862	CTCTCTATTTATAGAGGAGGGGGG	NA	GRMZM2G030862_T01	2062	0	-0.623	NA	NA	4	22163493	22169128	-	NA	NA	NA	Uncharacterized protein	AT5G23670.1//LCB2//long chain base2	LOC_Os11g31640.1////serine palmitoyltransferase 2, putative, expressed	0.0276707	no	no	no	dDRG	DownCNV/PAV
GRMZM2G064969	CGCCGTAGCCTGTGGCGCCGAGGT	NA	GRMZM2G064969_T01	55	0.5	-0.466	NA	NA	4	38990158	38991724	+	NA	NA	NA	Uncharacterized protein	AT5G42830.1////HXXXD-type acyl-transferase family protein	LOC_Os08g01950.1////transferase family protein, putative, expressed	0.00189552	no	no	yes	others	noCNV
GRMZM2G059018	ACTAGTCGGTTGCCCGTGCGTTGC	NA	GRMZM2G059018_T02	291	0	-0.502	NA	NA	4	73799138	73807463	-	NA	NA	NA	Carrier protein CGI-69	AT4G27940.1//ATMTM1,MTM1//manganese tracking factor for mitochondrial SOD2	LOC_Os08g29720.1////mitochondrial carrier protein, putative, expressed	0.00168593	no	no	no	uDRG	noCNV
GRMZM2G157458	CGGCCGTGGCCTCTTCGGCGGC	NA	GRMZM2G157458_T01	332	1	-0.48	NA	NA	4	146170301	146171109	-	NA	NA	NA	Ferredoxin-thioredoxin reductase%2C variable chain	AT5G08410.1//FTRA2//ferredoxin/thioredoxin reductase subunit A (variable subunit) 2	LOC_Os04g44650.1////ferredoxin-thioredoxin reductase, variable chain, putative, expressed	5.03e-08	no	yes	no	others	DownCNV/PAV
GRMZM2G004180	AATCCATGTGGATTGAGCGGGATT	NA	GRMZM2G004180_T01	1462	1	-0.492	NA	NA	4	151776492	151778099	-	NA	NA	NA	Uncharacterized protein	AT4G16790.1////hydroxyproline-rich glycoprotein family protein	LOC_Os02g43900.1////expressed protein	0.00800277	no	yes	no	dDRG	noCNV
GRMZM2G394528	AATCCATGTGGATTGAGCGGGATT	NA	GRMZM2G394528_T01	1535	1	-0.64	NA	NA	4	155320587	155324867	-	NA	NA	NA	Uncharacterized protein	AT4G00750.1////S-adenosyl-L-methionine-dependent methyltransferases superfamily protein	LOC_Os02g45310.1////dehydration response related protein, putative, expressed	6.33e-11	no	yes	yes	dDRG	noCNV
GRMZM2G021339	CGCCATAGCCTATGGCGCCGAGGT	ZmHB115	GRMZM2G021339_T01	1801	1	-0.461	NA	NA	4	165861785	165863994	+	hb115	Homeobox-transcription factor 115	assigned by the Grassius project, (Yilmaz et al 2009)	Putative homeobox DNA-binding and leucine zipper domain family protein isoform 1%3B Putative homeobox DNA-binding and leucine zipper domain family protein isoform 2	AT3G01470.1//ATHB-1,ATHB1,HAT5,HB-1,HD-ZIP-1//homeobox 1	LOC_Os02g49700.1////homeobox associated leucine zipper, putative, expressed	0.000219136	no	yes	no	uDRG	noCNV
GRMZM2G099297	AATAAAAAGAAACGGAGGGAG	NA	GRMZM2G099297_T01	1527	0	-0.614	NA	NA	4	171800262	171802016	+	NA	NA	NA	Uncharacterized protein	AT4G35160.1////O-methyltransferase family protein	LOC_Os05g43940.1////O-methyltransferase, putative, expressed	4.69e-05	no	no	no	dDRG	noCNV
GRMZM2G010491	AATCCGGCTGCGGCTGCGGCTTCT	NA	GRMZM2G010491_T02	897	0	-0.534	NA	NA	4	174019150	174020537	+	NA	NA	NA	Thioredoxin H-type 5%3B Uncharacterized protein	AT5G39950.1//ATH2,ATTRX2,ATTRXH2,TRX2,TRXH2//thioredoxin 2	LOC_Os07g09310.1////thioredoxin, putative, expressed	0.00854885	no	yes	no	uDRG	noCNV
GRMZM2G018398	TAAAAGCTTCGGCAGATAAGAG	ZmEREB14	GRMZM2G018398_T01	1595	1	-0.649	NA	NA	4	176066660	176069349	+	ereb14	AP2-EREBP-transcription factor 14	assigned by the Grassius project, (Yilmaz et al 2009)	Ethylene response element binding protein%3B Putative AP2/EREBP transcription factor superfamily protein isoform 1%3B Putative AP2/EREBP transcription factor superfamily protein isoform 2%3B Uncharacterized protein	AT1G53910.1//RAP2.12//related to AP2 12	LOC_Os02g54160.1////AP2 domain containing protein, expressed	0.0244507	no	no	no	dDRG	noCNV
GRMZM2G097081	CCTGCTGCTGCTGTTGCTCCT	ZmEREB57	GRMZM2G097081_T01	128	0.5	-0.668	NA	NA	4	176557756	176558869	+	ereb57	AP2-EREBP-transcription factor 57	assigned by the Grassius project, (Yilmaz et al 2009)	Putative AP2/EREBP transcription factor superfamily protein	AT1G19210.1////Integrase-type DNA-binding superfamily protein	LOC_Os02g54050.1////ethylene-responsive transcription factor, putative, expressed	3.46e-05	no	no	yes	others	noCNV
GRMZM2G475683	GTATTCCGCCACCCGGCCGAAGGA	NA	GRMZM2G475683_T01	933	1	-0.501	NA	NA	4	178275310	178276595	+	NA	NA	NA	SAUR12-auxin-responsive SAUR family member	AT2G46690.1////SAUR-like auxin-responsive protein family	LOC_Os02g52990.1////OsSAUR12 - Auxin-responsive SAUR gene family member, expressed	0.0116477	no	yes	no	others	noCNV
GRMZM2G055538	AGTGCCCGTGCGTTGCAACGGGGA	NA	GRMZM2G055538_T02	1	0	-0.555	NA	NA	4	187471055	187477306	-	NA	NA	NA	Myosin-like protein%3B Uncharacterized protein	AT1G55170.1////	LOC_Os08g33330.1////protein kinase PKN/PRK1, effector, putative, expressed	6.24e-05	no	no	no	uDRG	noCNV
GRMZM2G058120	ATTGCACCCGGAATCGTTCCAGCT	NA	GRMZM2G058120_T01	1687	1	-0.472	NA	NA	4	193403719	193406093	+	NA	NA	NA	Uncharacterized protein	AT5G19980.1//GONST4//golgi nucleotide sugar transporter 4	LOC_Os08g10350.1////integral membrane family protein, putative, expressed	0.0224608	no	no	no	uDRG	noCNV
GRMZM2G034947	CCCCGCGGGGAATCGGGGATCGGG	NA	GRMZM2G034947_T02	1621	0	-0.724	NA	NA	4	199031223	199033282	+	NA	NA	NA	Uncharacterized protein	NA	LOC_Os09g14170.1////expressed protein	3.68e-05	no	no	no	uDRG	DownCNV/PAV
GRMZM2G034947	CCCGTCCCCGTTTACCCGTCGGGG	NA	GRMZM2G034947_T02	1716	1	-0.708	NA	NA	4	199031223	199033282	+	NA	NA	NA	Uncharacterized protein	NA	LOC_Os09g14170.1////expressed protein	3.68e-05	no	no	no	uDRG	DownCNV/PAV
GRMZM2G034947	GAATTCCCCGCGGGGAATCGGGGA	NA	GRMZM2G034947_T03	1050	0	-0.706	NA	NA	4	199031223	199033282	+	NA	NA	NA	Uncharacterized protein	NA	LOC_Os09g14170.1////expressed protein	3.68e-05	no	no	no	uDRG	DownCNV/PAV
GRMZM2G034947	CCCCGCGGGGAACGGGGATGGGGA	NA	GRMZM2G034947_T02	1753	0.5	-0.726	NA	NA	4	199031223	199033282	+	NA	NA	NA	Uncharacterized protein	NA	LOC_Os09g14170.1////expressed protein	3.68e-05	no	no	no	uDRG	DownCNV/PAV
GRMZM2G034947	CCATCCCCATCCCCTAATGGAGGA	NA	GRMZM2G034947_T02	1648	0	-0.684	NA	NA	4	199031223	199033282	+	NA	NA	NA	Uncharacterized protein	NA	LOC_Os09g14170.1////expressed protein	3.68e-05	no	no	no	uDRG	DownCNV/PAV
GRMZM2G034947	ATATCCCCGCGGGGGAAGTTTCTT	NA	GRMZM2G034947_T03	1098	0	-0.602	NA	NA	4	199031223	199033282	+	NA	NA	NA	Uncharacterized protein	NA	LOC_Os09g14170.1////expressed protein	3.68e-05	no	no	no	uDRG	DownCNV/PAV
GRMZM2G034947	CCATCCCCATCCCCTAATAGAGGA	NA	GRMZM2G034947_T03	1072	1	-0.559	NA	NA	4	199031223	199033282	+	NA	NA	NA	Uncharacterized protein	NA	LOC_Os09g14170.1////expressed protein	3.68e-05	no	no	no	uDRG	DownCNV/PAV
GRMZM2G109071	GATTCTATTTCGTGCTAGTTAGGC	NA	GRMZM2G109071_T03	997	1	-0.458	NA	NA	4	210307097	210314439	+	NA	NA	NA	Uncharacterized protein	AT1G14700.1//ATPAP3,PAP3//purple acid phosphatase 3	LOC_Os11g34720.1////Ser/Thr protein phosphatase family protein, putative, expressed	2.59e-18	no	no	yes	dDRG	noCNV
GRMZM2G076896	CGGGCTCGCTTGGTGCAGATC	ZmEREB111	GRMZM2G076896_T01	1074	1	-0.508	zma-MIR168b,zma-MIR168a	Gene miRNA	4	215636055	215638692	+	ereb111	AP2-EREBP-transcription factor 111	assigned by the Grassius project, (Yilmaz et al 2009)	Putative AP2/EREBP transcription factor superfamily protein	AT5G61890.1////Integrase-type DNA-binding superfamily protein	LOC_Os04g32620.1////ethylene-responsive transcription factor ERF114, putative, expressed	0.0389891	no	no	no	uDRG	noCNV
GRMZM2G043056	AATCCGGCTGCGGCTGCGGCTTCT	NA	GRMZM2G043056_T02	54	0	-0.618	NA	NA	4	231769958	231776855	-	NA	NA	NA	Putative ARF GTPase-activating domain family protein isoform 1%3B Putative ARF GTPase-activating domain family protein isoform 2	AT4G13350.1//NIG//NSP (nuclear shuttle protein)-interacting GTPase	LOC_Os02g11820.2////GTPase-activating protein, putative, expressed	0.000207438	no	no	yes	uDRG	noCNV
GRMZM2G336875	GTTGCAACGCACGGGCACTTACCT	NA	GRMZM2G336875_T01	1061	0	-0.574	NA	NA	4	232843893	232846622	+	rps8	ribosomal protein S8 homolog	from: M95064	40S ribosomal protein S8	AT5G59240.1////Ribosomal protein S8e family protein	LOC_Os04g28180.1////ribosomal protein, putative, expressed	0.0029684	no	no	no	dDRG	noCNV
GRMZM2G153999	AATCCGGCTGCGGCTGCGGCTTCT	NA	GRMZM2G153999_T02	2449	0	-0.539	NA	NA	4	239769029	239772527	-	NA	NA	NA	Uncharacterized protein	AT5G05240.1////Uncharacterised conserved protein (UCP030365)	LOC_Os02g03940.1////expressed protein	0.0208674	no	no	yes	uDRG	noCNV
GRMZM2G054678	CGGGCCGCCGGCTGTCGGCAGAGG	NA	GRMZM2G054678_T02	69	1	-0.681	NA	NA	5	38103	51860	-	NA	NA	NA	NA	AT4G15880.1//ATESD4,ESD4//Cysteine proteinases superfamily protein	LOC_Os04g54680.1////ulp1 protease family protein, putative, expressed	0.000179307	no	no	no	uDRG	noCNV
GRMZM2G130678	TTTTCTTTTCTTTTTCATGGC	NA	GRMZM2G130678_T02	28	1	-0.477	NA	others	5	5246397	5249772	+	NA	NA	NA	Actin-depolymerizing factor 6%3B Uncharacterized protein	AT2G31200.1//ADF6,ATADF6//actin depolymerizing factor 6	LOC_Os03g56790.1////actin-depolymerizing factor, putative, expressed	1.23e-05	no	no	no	dDRG	noCNV
GRMZM2G386273	AAAAACTGTGGTTTTCAAAAACTT	ZmbZIP55	GRMZM2G386273_T01	766	0.5	-0.553	NA	NA	5	5632236	5633262	-	bzip55	bZIP-transcription factor 55	assigned by the Grassius project, (Yilmaz et al 2009)	Ocs element-binding factor 1	NA	LOC_Os03g56010.1////bZIP transcription factor domain containing protein, expressed	0.0156009	no	no	no	others	noCNV
GRMZM2G386273	ATAAACTACGGTATTGTCATAACT	ZmbZIP55	GRMZM2G386273_T01	810	0	-0.505	NA	NA	5	5632236	5633262	-	bzip55	bZIP-transcription factor 55	assigned by the Grassius project, (Yilmaz et al 2009)	Ocs element-binding factor 1	NA	LOC_Os03g56010.1////bZIP transcription factor domain containing protein, expressed	0.0156009	no	no	no	others	noCNV
GRMZM2G051270	TGAAGTGTTTGGGGGAACTC	NA	GRMZM2G051270_T02	145	1	-0.604	zma-MIR395p,zma-MIR395o,zma-MIR395n,zma-MIR395j,zma-MIR395i,zma-MIR395h,zma-MIR395g,zma-MIR395f,zma-MIR395e,zma-MIR395d,zma-MIR395a,zma-MIR395b	Gene miRNA	5	7710238	7714213	+	NA	NA	NA	Uncharacterized protein	AT3G22890.1//APS1//ATP sulfurylase 1	LOC_Os03g53230.1////bifunctional 3-phosphoadenosine 5-phosphosulfate synthetase, putative, expressed	0.00707183	no	no	no	uDRG	noCNV
GRMZM2G059013	AAGCATTAGGTCGTTTCTGAGACC	NA	GRMZM2G059013_T02	3471	0.5	-0.523	NA	NA	5	22010376	22020033	+	NA	NA	NA	NA	AT1G33250.1////Protein of unknown function (DUF604)	LOC_Os10g37260.1////fringe-related protein, putative, expressed	0.00169027	no	no	no	uDRG	noCNV
GRMZM2G059013	TGCCTGCCTCTTCCATTCCTTC	NA	GRMZM2G059013_T02	4835	0.5	-0.489	NA	NA	5	22010376	22020033	+	NA	NA	NA	NA	AT1G33250.1////Protein of unknown function (DUF604)	LOC_Os10g37260.1////fringe-related protein, putative, expressed	0.00169027	no	no	no	uDRG	noCNV
GRMZM2G002859	TGTTTGAATGCACTAGAGCTA	NA	GRMZM2G002859_T01	70	1	-0.739	NA	Gene rRNA	5	22619892	22625492	+	NA	NA	NA	Uncharacterized protein	AT4G34660.1////SH3 domain-containing protein	LOC_Os10g36870.1////src homology-3 domain protein 3, putative, expressed	1.25e-05	no	no	no	dDRG	noCNV
GRMZM2G477694	CACGTCGGGGACGGCTGACGGA	NA	GRMZM2G477694_T02	12	1	-0.558	NA	NA	5	26998356	27013206	-	NA	NA	NA	Uncharacterized protein	AT3G19840.1//ATPRP40C,PRP40C//pre-mRNA-processing protein 40C	NA	3.95e-07	no	no	yes	uDRG	noCNV
GRMZM2G075051	AGGGCTAGTTTGGAAACTCAAATC	NA	GRMZM2G075051_T01	1685	0.5	-0.642	NA	NA	5	31282654	31289863	+	NA	NA	NA	Ras-related protein Rab-18%3B Uncharacterized protein	AT5G03530.1//ATRAB,ATRAB ALPHA,ATRAB18B,ATRABC2A,RABC2A//RAB GTPase homolog C2A	LOC_Os10g31830.1////ras-related protein, putative, expressed	0.00020067	no	no	no	uDRG	noCNV
GRMZM2G116243	ATGTACTATATGAATAAATCCGTA	NA	GRMZM2G116243_T04	77	1	-0.61	NA	NA	5	60026465	60031511	+	cl439_1b	0	0	Uncharacterized protein	AT2G45670.1////calcineurin B subunit-related	LOC_Os06g49790.1////acyltransferase, putative, expressed	0.0218351	no	no	no	uDRG	noCNV
GRMZM2G021106	AGAACGATCATCAATTGGTGGC	NA	GRMZM2G021106_T01	943	1	-0.502	NA	NA	5	152605126	152606848	-	NA	NA	NA	Uncharacterized protein	AT1G17710.1////Pyridoxal phosphate phosphatase-related protein	LOC_Os02g13290.1////phosphoethanolamine/phosphocholine phosphatase, putative, expressed	0.00174035	no	no	no	dDRG	noCNV
GRMZM2G337749	GGCGTGATCCCAAAAAATTAAGGA	NA	GRMZM2G337749_T01	1236	0	-0.477	NA	NA	5	173435057	173440344	-	ddt3	DDT-transcription factor 3	assigned by the Grassius project, (Yilmaz et al 2009)	NA	AT5G08630.1////DDT domain-containing protein	LOC_Os02g35100.1////DDT domain containing protein, putative, expressed	0.00898225	no	no	yes	uDRG	noCNV
GRMZM2G179294	TTAAGTTGTTATTTGGTGACGA	NA	GRMZM2G179294_T01	913	1	-0.523	NA	NA	5	180782642	180783869	-	NA	NA	NA	High affinity nitrate transporter	AT5G50200.1//ATNRT3.1,NRT3.1,WR3//nitrate transmembrane transporters	LOC_Os02g38230.1////high affinity nitrate transporter, putative, expressed	0.0489296	no	no	no	others	noCNV
GRMZM2G028096	AGATGAGCCAAAGCCATTCTGA	NA	GRMZM2G028096_T01	1455	0.5	-0.654	NA	NA	5	182584712	182592899	-	NA	NA	NA	Uncharacterized protein	AT3G03340.1//UNE6//LUC7 related protein	LOC_Os02g39300.1////RNA-binding protein Luc7-like, putative, expressed	0.00423409	no	no	no	uDRG	noCNV
GRMZM2G046244	GCGGCGCGACCGTCTTGGTGGA	NA	GRMZM2G046244_T01	254	0.5	-0.498	NA	NA	5	200931643	200935048	+	NA	NA	NA	Cation cation antiporter	AT3G55600.1////Membrane fusion protein Use1	LOC_Os08g42110.1////expressed protein	4.02e-05	no	no	no	uDRG	noCNV
GRMZM2G147377	ATTTTAGAGGAATTGGAATTCACT	NA	GRMZM2G147377_T02	2863	0.5	-0.454	NA	NA	5	201523340	201527450	-	NA	NA	NA	Kinesin light chain	AT3G27960.1////Tetratricopeptide repeat (TPR)-like superfamily protein	LOC_Os02g47880.1////tetratricopeptide repeat domain containing protein, expressed	0.0106317	no	no	no	dDRG	noCNV
GRMZM2G123371	TTCCTCATGTTAGTACTAACT	NA	GRMZM2G123371_T01	2905	0.5	-0.817	NA	NA	5	202621246	202628418	-	NA	NA	NA	Uncharacterized protein	AT1G76550.1////Phosphofructokinase family protein	LOC_Os02g48360.1////pyrophosphate--fructose 6-phosphate 1-phosphotransferase subunit alpha, putative, expressed	1.62e-05	no	yes	no	dDRG	noCNV
GRMZM2G045404	TATCTAGAAAAGTCAAAATGT	NA	GRMZM2G045404_T02	1388	1	-0.51	NA	NA	5	203708066	203711760	+	NA	NA	NA	Uncharacterized protein	AT2G04550.1//DSPTP1E,IBR5//indole-3-butyric acid response 5	LOC_Os02g48840.1////dual specificity protein phosphatase, putative, expressed	4.96e-05	no	no	yes	uDRG	noCNV
GRMZM2G042438	TGTGTGCCCGTGCGTTGCAACGGA	NA	GRMZM2G042438_T01	815	0.5	-0.604	NA	NA	5	204685663	204688072	-	NA	NA	NA	NA	NA	NA	9.52e-05	no	no	no	uDRG	noCNV
GRMZM2G140150	CCAATACACATGGATTGGATGGGA	NA	GRMZM2G140150_T01	1470	0.5	-0.631	NA	NA	5	205833927	205838509	-	NA	NA	NA	Pyruvate dehydrogenase E1 component alpha subunit	AT1G59900.1//AT-E1 ALPHA,E1 ALPHA//pyruvate dehydrogenase complex E1 alpha subunit	LOC_Os02g50620.1////dehydrogenase E1 component domain containing protein, expressed	1.2e-13	no	no	no	dDRG	noCNV
GRMZM2G124460	GTTTGGGTACTCTAGTATTGACCT	NA	GRMZM2G124460_T01	1805	0	-0.53	NA	NA	5	212227941	212248198	-	NA	NA	NA	Uncharacterized protein	AT3G54190.1////Transducin/WD40 repeat-like superfamily protein	LOC_Os02g54090.1////expressed protein	0.0221297	no	no	no	uDRG	noCNV
GRMZM2G015432	GATGAGCATCGACACATATCTGAT	NA	GRMZM2G015432_T02	2212	1	-0.494	NA	NA	6	121901214	121906150	-	NA	NA	NA	Uncharacterized protein	AT2G42740.1//RPL16A//ribosomal protein large subunit 16A	LOC_Os01g10820.1////ribosomal protein L5, putative, expressed	0.00112229	no	no	yes	uDRG	noCNV
GRMZM2G015432	AAATCAGTTTTAAGGGACATCTAA	NA	GRMZM2G015432_T04	920	1	-0.475	NA	NA	6	121901214	121906150	-	NA	NA	NA	Uncharacterized protein	AT2G42740.1//RPL16A//ribosomal protein large subunit 16A	LOC_Os01g10820.1////ribosomal protein L5, putative, expressed	0.00112229	no	no	yes	uDRG	noCNV
GRMZM2G361605	GTGTAGACTGCCCCCGCCTGAAGC	NA	GRMZM2G361605_T01	573	0.5	-0.495	NA	NA	6	131147984	131160298	-	NA	NA	NA	Uncharacterized protein	AT1G79920.1////Heat shock protein 70 (Hsp 70) family protein	LOC_Os01g08560.1////DnaK family protein, putative, expressed	9.86e-06	no	no	no	uDRG	noCNV
GRMZM2G345687	TGAGTGCCCGTGCGTTGCAACGGA	NA	GRMZM2G345687_T02	1530	0.5	-0.601	NA	NA	6	136558419	136562959	+	NA	NA	NA	Uncharacterized protein	AT1G05680.1//UGT74E2//Uridine diphosphate glycosyltransferase 74E2	LOC_Os04g12980.1////UDP-glucoronosyl/UDP-glucosyl transferase, putative, expressed	0.00528948	no	no	no	uDRG	DownCNV/PAV
GRMZM5G892467	TAGAAGAGCTTAGAGAGTATGC	NA	GRMZM5G892467_T01	890	1	-0.481	NA	NA	6	147845647	147847794	-	NA	NA	NA	Uncharacterized protein	NA	NA	1.27e-08	no	no	no	uDRG	noCNV
GRMZM2G057369	ATTGGAGGGGATTGAGGAGGCT	NA	GRMZM2G057369_T01	339	1	-0.509	NA	Gene miRNA	6	163209693	163214633	+	NA	NA	NA	Anti-silencing protein 1%3B Uncharacterized protein	AT5G38110.1//ASF1B,SGA01,SGA1//anti- silencing function 1b	LOC_Os05g48030.1////anti-silencing protein, ASF1-like domain containing protein, expressed	0.00769436	no	no	no	dDRG	noCNV
GRMZM2G065040	AGGACTTAGCCCTCTTCTTCCT	NA	GRMZM2G065040_T01	588	1	-0.604	NA	NA	7	4311957	4313916	-	NA	NA	NA	NA	AT2G29180.1////	LOC_Os03g16470.1////expressed protein	0.00829787	no	no	yes	dDRG	noCNV
GRMZM2G142063	GAGCGCGAGGGCGAGCGCGAAGGG	NA	GRMZM2G142063_T02	2077	1	-0.54	NA	NA	7	5340328	5342773	+	NA	NA	NA	NA	AT1G30220.1//ATINT2,INT2//inositol transporter 2	LOC_Os07g05640.1////transporter family protein, putative, expressed	1.01e-07	no	yes	no	others	noCNV
GRMZM2G395535	AGACCAATCCAGAGGGGGATTGGA	NA	GRMZM2G395535_T01	1238	0	-0.46	NA	NA	7	6224658	6226029	+	NA	NA	NA	NA	AT5G01420.1////Glutaredoxin family protein	LOC_Os07g06600.1////glutaredoxin, putative, expressed	0.0165782	no	no	no	uDRG	noCNV
GRMZM2G044469	ATTAGAGAAGCAATCCGGTTAGGA	NA	GRMZM2G044469_T02	949	1	-0.673	NA	NA	7	7415058	7418404	+	NA	NA	NA	NA	AT5G20960.1//AAO1,AO1,AOalpha,AT-AO1,ATAO,AtAO1//aldehyde oxidase 1	LOC_Os03g57690.1////aldehyde oxidase, putative, expressed	1.54e-08	no	no	yes	uDRG	noCNV
GRMZM2G093276	TGAGTGCCCGTGCGTTGCGACGGA	NA	GRMZM2G093276_T01	712	1	-0.538	NA	NA	7	21809955	21811964	-	NA	NA	NA	ZIP zinc/iron transport family protein	AT1G05300.1//ZIP5//zinc transporter 5 precursor	LOC_Os07g12890.1////metal cation transporter, putative, expressed	0.000265142	no	yes	yes	others	noCNV
GRMZM2G016622	ACACATTGTGCAAGGGTAGCAGGT	NA	GRMZM2G016622_T02	1281	0	-0.495	NA	NA	7	38037621	38039486	+	gpm930	0	0	Photosystem I reaction center subunit IV A	AT2G20260.1//PSAE-2//photosystem I subunit E-2	LOC_Os07g25430.1////photosystem I reaction center subunit IV A, chloroplast precursor, putative, expressed	0.00519274	no	yes	yes	dDRG	noCNV
GRMZM2G016622	AATGACAGAACACAGAATGATAGT	NA	GRMZM2G016622_T01	1081	1	-0.506	NA	NA	7	38037621	38039486	+	gpm930	0	0	Photosystem I reaction center subunit IV A	AT2G20260.1//PSAE-2//photosystem I subunit E-2	LOC_Os07g25430.1////photosystem I reaction center subunit IV A, chloroplast precursor, putative, expressed	0.00519274	no	yes	yes	dDRG	noCNV
GRMZM2G001114	AAAAGAGAAAGAGAGAGAACGG	NA	GRMZM2G001114_T01	1928	1	-0.498	NA	NA	7	82672544	82681910	-	umc1433	0	0	Protein binding protein%3B Uncharacterized protein	AT1G08050.1////Zinc finger (C3HC4-type RING finger) family protein	LOC_Os09g12720.1////zinc finger, C3HC4 type domain containing protein, expressed	9e-10	no	yes	no	dDRG	noCNV
GRMZM2G129453	ATTAGTCCCTAGAAACCAAACACC	NA	GRMZM2G129453_T01	2060	0	-0.556	NA	NA	7	92966320	92968603	-	NA	NA	NA	Desaturase/cytochrome b5 protein%3B Uncharacterized protein	AT2G46210.1////Fatty acid/sphingolipid desaturase	LOC_Os09g16920.1////desaturase/cytochrome b5 protein, putative, expressed	4.97e-23	no	yes	yes	dDRG	noCNV
GRMZM2G414813	TTTGGGCAAGTAATACCCAGCGGG	NA	GRMZM2G414813_T01	1059	0	-0.464	NA	NA	7	104912102	104917076	+	NA	NA	NA	Uncharacterized protein	AT5G62890.1////Xanthine/uracil permease family protein	LOC_Os09g21340.1////nucleobase-ascorbate transporter, putative, expressed	7.75e-14	no	yes	no	uDRG	noCNV
GRMZM2G114642	GGTGAAAGAGCTCATTGGTGGAGG	NA	GRMZM2G114642_T02	1286	1	-0.494	NA	NA	7	118550916	118556690	+	gl1	glossy1	Classical Gene from J.S	Glossy1	AT5G57800.1//CER3,FLP1,WAX2,YRE//Fatty acid hydroxylase superfamily	LOC_Os09g25850.1////WAX2, putative, expressed	5.97e-07	no	no	yes	dDRG	noCNV
GRMZM2G114642	AGAGAACGACAGAGCAAGTGGTGC	NA	GRMZM2G114642_T02	1314	0.5	-0.493	NA	NA	7	118550916	118556690	+	gl1	glossy1	Classical Gene from J.S	Glossy1	AT5G57800.1//CER3,FLP1,WAX2,YRE//Fatty acid hydroxylase superfamily	LOC_Os09g25850.1////WAX2, putative, expressed	5.97e-07	no	no	yes	dDRG	noCNV
GRMZM2G000288	AGTGCCCGTGCGTTGCAACGGGGA	NA	GRMZM2G000288_T01	42	1	-0.548	NA	NA	7	138128865	138130245	+	NA	NA	NA	NA	NA	NA	0.0134792	no	no	no	uDRG	noCNV
GRMZM2G149619	GAATGGCAGAACACGGAATGGGGC	NA	GRMZM2G149619_T01	2171	0.5	-0.536	NA	NA	7	140853966	140857824	+	NA	NA	NA	Uncharacterized protein	AT4G22840.1////Sodium Bile acid symporter family	LOC_Os09g34900.1////bile acid sodium symporter family protein, putative, expressed	3.18e-06	no	no	no	dDRG	noCNV
GRMZM2G165644	AGCTTTTCTGAGAATCTGGCTGTG	NA	GRMZM2G165644_T02	829	0	-0.759	NA	NA	7	154553217	154555567	+	NA	NA	NA	Uncharacterized protein	AT4G23310.1//CRK23//cysteine-rich RLK (RECEPTOR-like protein kinase) 23	LOC_Os07g47230.1////TKL_IRAK_DUF26-lh.10 - DUF26 kinases have homology to DUF26 containing loci, expressed	0.0162299	no	no	no	uDRG	noCNV
GRMZM2G057281	GGGTCTCACATCTCTATATAAGGA	NA	GRMZM2G057281_T01	322	0	-0.7	NA	NA	7	157607233	157609225	+	NA	NA	NA	Chlorophyll a-b binding protein of LHCII type III	AT5G54270.1//LHCB3,LHCB3*1//light-harvesting chlorophyll B-binding protein 3	LOC_Os07g37550.1////chlorophyll A-B binding protein, putative, expressed	0.000664716	no	no	yes	dDRG	noCNV
GRMZM5G862931	ACGGTTGGACTTAAACAAACACAA	NA	GRMZM5G862931_T03	1357	0	-0.485	NA	NA	7	163387138	163397911	+	NA	NA	NA	Uncharacterized protein	AT1G26520.1////Cobalamin biosynthesis CobW-like protein	LOC_Os07g40790.1////COBW domain containing protein, putative, expressed	0.000594946	no	no	no	uDRG	noCNV
GRMZM2G023438	TTTGAATGCACTAGAACTAAT	NA	GRMZM2G023438_T03	128	1	-0.493	NA	NA	7	174189332	174193300	+	NA	NA	NA	Uncharacterized protein	AT1G09270.1//IMPA-4//importin alpha isoform 4	LOC_Os07g48880.1////importin subunit alpha-1b, putative, expressed	0.00906207	no	no	no	uDRG	noCNV
GRMZM2G023438	AAACTTTAGCACTTCAATTCATAT	NA	GRMZM2G023438_T03	1	0	-0.506	NA	NA	7	174189332	174193300	+	NA	NA	NA	Uncharacterized protein	AT1G09270.1//IMPA-4//importin alpha isoform 4	LOC_Os07g48880.1////importin subunit alpha-1b, putative, expressed	0.00906207	no	no	no	uDRG	noCNV
GRMZM2G023438	AGGCCCTGTTCCAATCTCGCGAGA	NA	GRMZM2G023438_T03	100	0	-0.583	NA	NA	7	174189332	174193300	+	NA	NA	NA	Uncharacterized protein	AT1G09270.1//IMPA-4//importin alpha isoform 4	LOC_Os07g48880.1////importin subunit alpha-1b, putative, expressed	0.00906207	no	no	no	uDRG	noCNV
GRMZM2G324973	CATGTCCATTTTAGAGTGTTGGCT	NA	GRMZM2G324973_T01	1385	0	-0.464	NA	NA	7	175562656	175568845	-	NA	NA	NA	Uncharacterized protein	NA	NA	0.000192296	no	no	yes	uDRG	noCNV
GRMZM2G080937	TTCCTCTGGATATGCTCCCTGC	NA	GRMZM2G080937_T02	593	1	-0.453	NA	NA	8	7977578	7982579	+	NA	NA	NA	Uncharacterized protein	AT1G27510.1////Protein of unknown function (DUF3506)	LOC_Os01g01790.1////expressed protein	1.43e-16	no	yes	no	uDRG	noCNV
GRMZM2G165987	CTCGGAGTTAGAGAATTATGGAGC	NA	GRMZM2G165987_T01	11	1	-0.481	NA	NA	8	13592880	13595740	+	NA	NA	NA	Pirin-like protein%3B Uncharacterized protein	AT2G43120.1////RmlC-like cupins superfamily protein	LOC_Os03g62790.1////pirin, putative, expressed	0.0130574	no	no	yes	dDRG	noCNV
GRMZM2G130953	AAAAGATCATAGCTCAACAAGTT	NA	GRMZM2G130953_T02	1142	1	-0.475	NA	NA	8	18321199	18323290	-	bif1	barren inflorescence1	Galli et al., 2015; and assigned by the Grassius project, (Yilmaz et al 2009) to iaa35	IAA1-auxin-responsive Aux/IAA family member%3B Uncharacterized protein	AT1G04250.1//AXR3,IAA17//AUX/IAA transcriptional regulator family protein	LOC_Os01g08320.1////OsIAA1 - Auxin-responsive Aux/IAA gene family member, expressed	0.0121928	no	no	no	uDRG	noCNV
GRMZM2G032049	TCCCGCACTGTGCGGGGTCTGGGG	NA	GRMZM2G032049_T01	2882	0	-0.464	NA	NA	8	21821792	21828125	+	NA	NA	NA	Glutaminyl-tRNA synthetase	AT1G25350.1//OVA9//glutamine-tRNA ligase, putative / glutaminyl-tRNA synthetase, putative / GlnRS, putative	LOC_Os01g09000.1////glutaminyl-tRNA synthetase, putative, expressed	0.000812144	no	no	no	uDRG	noCNV
GRMZM2G079790	AAATTGCCTGGATCGGAAAATCGC	NA	GRMZM2G079790_T01	51	0	-0.462	NA	NA	8	31991999	31993305	-	NA	NA	NA	Uncharacterized protein	NA	NA	0.010727	no	no	no	uDRG	noCNV
GRMZM2G155216	AGTATATTTTATAGAATTTAGGGC	NA	GRMZM2G155216_T01	170	0.5	-0.534	NA	NA	8	70312571	70314733	-	lhcb3	light harvesting chlorophyll a/b binding protein3	Classical Gene from J.S	Chlorophyll a-b binding protein M9%2C chloroplastic	AT2G34420.1//LHB1B2,LHCB1.5//photosystem II light harvesting complex gene B1B2	LOC_Os09g17740.1////chlorophyll A-B binding protein, putative, expressed	0.0171199	no	no	yes	dDRG	noCNV
GRMZM2G083344	TGCAAGTTGATCCAACGGGGG	NA	GRMZM2G083344_T01	21	1	-0.636	NA	NA	8	94352445	94383332	-	NA	NA	NA	Uncharacterized protein	AT5G46110.4//APE2,TPT//Glucose-6-phosphate/phosphate translocator-related	LOC_Os05g15160.1////phosphate/phosphate translocator, putative, expressed	0.00028302	no	yes	no	dDRG	noCNV
GRMZM2G033799	ACCATATCGAATTTTGCACTGGGC	NA	GRMZM2G033799_T03	1373	0	-0.476	NA	NA	8	100920138	100924873	+	got5	glutamate-oxaloacetate transaminase5	from Tausta et al 2014	Aspartate aminotransferase%3B Uncharacterized protein	AT2G22250.2//AAT,ATAAT,MEE17//aspartate aminotransferase	LOC_Os01g65090.1////aminotransferase, classes I and II, domain containing protein, expressed	0.0011993	no	no	no	dDRG	noCNV
AC205471.4_FG007	ATTGATTCCGTAGCAACGCACGGG	NA	AC205471.4_FGT007	595	0	-0.593	NA	NA	8	124755914	124756553	-	NA	NA	NA	Uncharacterized protein	AT4G21970.1////Protein of unknown function, DUF584	LOC_Os05g45450.1////DUF584 domain containing protein, putative, expressed	2.23e-08	no	yes	yes	others	noCNV
GRMZM2G096764	AAAGTTTATCTCGCGAGATTGGAA	NA	GRMZM2G096764_T02	1380	0.5	-0.674	NA	NA	8	138677873	138685412	-	NA	NA	NA	Uncharacterized protein	AT2G26140.1//ftsh4//FTSH protease 4	LOC_Os01g39260.1////OsFtsH5 FtsH protease, homologue of AtFtsH4, expressed	7.57e-08	no	no	no	uDRG	noCNV
GRMZM2G304573	CGCCCCCGGCAGCCGTCGTCGGC	ZmWRKY84	GRMZM2G304573_T01	308	1	-0.496	NA	NA	8	139485939	139486968	-	wrky84	WRKY-transcription factor 84	assigned by the Grassius project, (Yilmaz et al 2009)	Putative WRKY DNA-binding domain superfamily protein	AT1G68150.1//ATWRKY9,WRKY9//WRKY DNA-binding protein 9	LOC_Os01g40430.1////WRKY27, expressed	0.0346803	no	no	no	others	noCNV
GRMZM2G117754	ATATTAATCCAAAGGATCTAGGGG	NA	GRMZM2G117754_T02	13	0	-0.535	NA	NA	8	142511549	142517106	+	NA	NA	NA	Alpha-L-fucosidase 2%3B Uncharacterized protein	AT2G27360.1////GDSL-like Lipase/Acylhydrolase superfamily protein	LOC_Os01g42730.1////GDSL-like lipase/acylhydrolase, putative, expressed	2.9e-05	no	no	yes	dDRG	noCNV
AC155376.2_FG004	CGTCGTCGTCGGAGAACCGCGC	NA	AC155376.2_FGT004	1570	1	-0.492	NA	NA	8	163685360	163687718	+	NA	NA	NA	Uncharacterized protein	AT3G25500.1//AFH1,AHF1,ATFH1,FH1//formin homology 1	LOC_Os01g67240.1////formin-like protein 1 precursor, putative, expressed	1.19e-12	no	yes	no	dDRG	noCNV
GRMZM2G005236	GAGAGAAAGAGAGGAAGGA	NA	GRMZM2G005236_T01	133	1	-0.552	NA	NA	8	165092449	165098186	-	NA	NA	NA	Uncharacterized protein	AT1G22910.1////RNA-binding (RRM/RBD/RNP motifs) family protein	LOC_Os01g65550.1////RNA recognition motif containing protein, putative, expressed	2.48e-07	no	yes	no	dDRG	noCNV
GRMZM2G406155	GGAGGGAGAGAAGAAGAAGGGG	NA	GRMZM2G406155_T01	951	1	-0.484	NA	NA	8	173162555	173163618	+	NA	NA	NA	Uncharacterized protein	AT1G29195.1////	LOC_Os05g07240.1////expressed protein	0.014775	no	no	no	dDRG	noCNV
GRMZM2G446170	AGTGTCTTAGCTCTATGTTCGAGA	NA	GRMZM2G446170_T04	448	0.5	-0.501	NA	NA	8	175285916	175288181	-	burp1	BURP domain-containing protein-RD22-like1	0	Uncharacterized protein	AT5G25610.1//ATRD22,RD22//BURP domain-containing protein	LOC_Os01g53240.1////BURP domain containing protein, expressed	1.18e-19	no	yes	yes	dDRG	noCNV
GRMZM2G063765	CGGAGGAAGGAGAGGATGAGGC	NA	GRMZM2G063765_T01	985	1	-0.466	NA	Gene rRNA	9	1028108	1031618	+	NA	NA	NA	Putative DUF26 domain family protein%3B Uncharacterized protein	AT2G01660.1//PDLP6//plasmodesmata-located protein 6	LOC_Os06g14280.1////cysteine-rich repeat secretory protein precursor, putative, expressed	0.00517043	no	no	no	dDRG	noCNV
GRMZM2G116966	AACTATAGACGGCTGCTGATGGTC	NA	GRMZM2G116966_T01	1807	0.5	-0.635	NA	NA	9	2118350	2121095	-	NA	NA	NA	Benzoate carboxyl methyltransferase	AT5G04370.2//NAMT1//S-adenosyl-L-methionine-dependent methyltransferases superfamily protein	LOC_Os06g13350.1////SAM dependent carboxyl methyltransferase, putative, expressed	3.75e-26	no	yes	yes	dDRG	noCNV
GRMZM2G000231	ATGTCTAAAACATGTGTCTTACGA	NA	GRMZM2G000231_T01	363	0	-0.589	NA	NA	9	7312254	7320386	-	NA	NA	NA	Uncharacterized protein	AT5G36210.1////alpha/beta-Hydrolases superfamily protein	LOC_Os06g11190.1////OsPOP13 - Putative Prolyl Oligopeptidase homologue, expressed	0.036683	no	no	no	dDRG	noCNV
GRMZM2G033805	AAAATACTGTAGAAGCCGCAGCCG	NA	GRMZM2G033805_T01	2896	0.5	-0.58	NA	NA	9	9315632	9319213	-	NA	NA	NA	Putative DUF231 domain containing family protein	AT5G06700.1//TBR//Plant protein of unknown function (DUF828)	LOC_Os06g10560.1////leaf senescence related protein, putative, expressed	0.00271193	no	no	no	uDRG	noCNV
GRMZM2G052562	GTGGATTGAGTGGGATTGGATGGG	NA	GRMZM2G052562_T02	1488	0.5	-0.553	NA	NA	9	18630211	18632350	+	znod1	Zea nodulation homolog1	0	Alpha-L-fucosidase 2%3B Alpha-L-fucosidase 2 isoform 1%3B Alpha-L-fucosidase 2 isoform 2%3B Uncharacterized protein	AT5G45910.1////GDSL-like Lipase/Acylhydrolase superfamily protein	LOC_Os05g11910.1////GDSL-like lipase/acylhydrolase, putative, expressed	9.96e-13	no	no	yes	dDRG	noCNV
GRMZM2G000932	CGGCCGTGGCCTCTTCGGCGGC	NA	GRMZM2G000932_T01	292	1	-0.585	NA	NA	9	24497102	24499075	-	NA	NA	NA	Uncharacterized protein	AT4G24050.1////NAD(P)-binding Rossmann-fold superfamily protein	LOC_Os06g03830.1////retinol dehydrogenase, putative, expressed	0.000714886	no	no	no	others	noCNV
GRMZM2G393146	GACGGGGATTTATCCCCGCGGGGA	NA	GRMZM2G393146_T01	4306	0.5	-0.571	NA	NA	9	26491999	26500254	+	NA	NA	NA	Uncharacterized protein	AT5G35930.1////AMP-dependent synthetase and ligase family protein	LOC_Os06g02160.1////AMP-binding enzyme family protein, expressed	0.0373527	no	no	no	uDRG	noCNV
GRMZM2G121418	ATAGTCTTATGTGATGGATCTGGC	NA	GRMZM2G121418_T01	1587	1	-0.522	NA	others	9	43535207	43538696	+	NA	NA	NA	Uncharacterized protein	AT4G11000.1////Ankyrin repeat family protein	LOC_Os06g18990.1////embryogenesis transmembrane protein, putative, expressed	4.19e-06	no	no	no	dDRG	noCNV
GRMZM2G451112	GTGCATGAACTCACCAAAGGTGGG	NA	GRMZM2G451112_T01	1910	0	-0.5	NA	NA	9	89133594	89135770	+	NA	NA	NA	Uncharacterized protein	NA	NA	0.00210308	no	no	no	others	DownCNV/PAV
GRMZM5G803308	GAGGGGGAGAGAGAGGAGGACGGC	ZmMYB112	GRMZM5G803308_T01	1349	1	-0.537	NA	others	9	97396868	97398308	+	myb112	MYB-transcription factor 112	assigned by the Grassius project, (Yilmaz et al 2009)	MYB transcription factor TaMYB1%3B Putative MYB DNA-binding domain superfamily protein	AT4G37260.1//ATMYB73,MYB73//myb domain protein 73	LOC_Os06g43090.1////MYB transcription factor TaMYB1, putative, expressed	0.000567312	no	yes	no	uDRG	noCNV
GRMZM2G060311	AATCCATGTGGATTGAGCGGGATT	NA	GRMZM2G060311_T01	878	1	-0.573	NA	NA	9	105442654	105443808	+	NA	NA	NA	Low temperature and salt responsive protein	AT4G28088.1////Low temperature and salt responsive protein family	LOC_Os06g44220.1////OsRCI2-9 - Putative low temperature and salt responsive protein, expressed	8.62e-05	no	no	no	others	noCNV
GRMZM2G114312	GGCCGCAGCGGTGCCCCCTACAGC	NA	GRMZM2G114312_T02	545	0.5	-0.478	NA	NA	9	123126255	123130534	+	NA	NA	NA	Uncharacterized protein	AT1G54140.1//TAF9,TAFII21//TATA binding protein associated factor 21kDa subunit	LOC_Os03g29470.1////transcription initiation factor IID, putative, expressed	2.41e-05	no	no	no	uDRG	noCNV
GRMZM2G317584	AGAGCATCTCCAACAACGTGACCT	ZmEIL9	GRMZM2G317584_T01	19	0	-0.492	NA	NA	9	133469222	133473010	-	eil1	ethylene insensitive-like1	0	Uncharacterized protein	AT3G20770.1//AtEIN3,EIN3//Ethylene insensitive 3 family protein	LOC_Os03g20790.1////ethylene-insensitive 3, putative, expressed	0.01162	no	no	no	uDRG	noCNV
GRMZM2G036861	AATACTCGTGGCTCGATAACTCGC	NA	GRMZM2G036861_T05	157	0	-0.514	NA	NA	9	142191884	142198166	+	NA	NA	NA	Chorismate synthase	AT1G48850.1//EMB1144//chorismate synthase, putative / 5-enolpyruvylshikimate-3-phosphate phospholyase, putative	LOC_Os03g14990.1////chorismate synthase 2, chloroplast precursor, putative, expressed	7.25e-08	no	no	no	dDRG	noCNV
GRMZM2G081175	ACGGTTGGACTTAAACAAACACAA	NA	GRMZM2G081175_T01	1904	0.5	-0.45	NA	NA	9	143586090	143590243	+	NA	NA	NA	Uncharacterized protein	AT2G17840.1//ERD7//Senescence/dehydration-associated protein-related	LOC_Os03g13840.1////senescence-associated protein, putative, expressed	0.00293412	no	no	no	uDRG	noCNV
GRMZM2G115925	AAAGTTTGGATCTTTTAATGGTAT	NA	GRMZM2G115925_T01	70	0.5	-0.568	NA	NA	9	143864968	143869347	-	NA	NA	NA	Small nuclear ribonucleoprotein Sm D3%3B Uncharacterized protein	AT1G20580.1////Small nuclear ribonucleoprotein family protein	LOC_Os02g01250.1////LSM domain containing protein, expressed	0.0150335	no	no	no	dDRG	noCNV
GRMZM2G097812	ACATAAACACATAATCGGTTGAGT	NA	GRMZM2G097812_T01	2749	1	-0.578	NA	NA	9	144765866	144768894	+	NA	NA	NA	Uncharacterized protein	NA	NA	0.000251418	no	no	yes	uDRG	noCNV
GRMZM5G846548	TTGTATAGCATCAGATCGATAGAA	NA	GRMZM5G846548_T02	2023	0	-0.658	NA	NA	9	147221321	147228145	+	NA	NA	NA	Uncharacterized protein	AT1G13770.1//RUS3//Protein of unknown function, DUF647	LOC_Os03g11500.1////DUF647 domain containing protein, putative, expressed	0.0499546	no	no	no	uDRG	noCNV
GRMZM2G169365	ATACTTCAGTTTTGAAAACAGAGA	NA	GRMZM2G169365_T01	1874	0.5	-0.76	NA	NA	9	151083033	151087840	-	cnh1	carbon-nitrogen hydrolase homolog1	0	Uncharacterized protein	AT5G12040.1////Nitrilase/cyanide hydratase and apolipoprotein N-acyltransferase family protein	LOC_Os03g07910.1////nitrilase, putative, expressed	6.36e-08	no	no	no	uDRG	noCNV
GRMZM2G169365	AGTATTTGAGAATACTGCAGTATT	NA	GRMZM2G169365_T01	1808	1	-0.541	NA	NA	9	151083033	151087840	-	cnh1	carbon-nitrogen hydrolase homolog1	0	Uncharacterized protein	AT5G12040.1////Nitrilase/cyanide hydratase and apolipoprotein N-acyltransferase family protein	LOC_Os03g07910.1////nitrilase, putative, expressed	6.36e-08	no	no	no	uDRG	noCNV
GRMZM2G054969	GTCCGCGACCTGGCGCGAGGCGGC	NA	GRMZM2G054969_T03	1176	1	-0.551	NA	NA	9	151692156	151696804	-	NA	NA	NA	Uncharacterized protein	AT3G60070.1////Major facilitator superfamily protein	LOC_Os03g07170.1////lactose permease-related, putative, expressed	0.0416424	no	no	no	uDRG	DownCNV/PAV
GRMZM2G009869	AGTATATTTTATAGAATTTAGGGC	NA	GRMZM2G009869_T02	220	0	-0.622	NA	NA	9	151838501	151842903	+	NA	NA	NA	Uncharacterized protein	AT1G20650.1////Protein kinase superfamily protein	LOC_Os03g03880.1////protein kinase, putative, expressed	0.00302331	no	no	no	dDRG	noCNV
GRMZM2G009869	ACGGTGTAGTATATTTGAGTCACT	NA	GRMZM2G009869_T02	135	0	-0.526	NA	NA	9	151838501	151842903	+	NA	NA	NA	Uncharacterized protein	AT1G20650.1////Protein kinase superfamily protein	LOC_Os03g03880.1////protein kinase, putative, expressed	0.00302331	no	no	no	dDRG	noCNV
GRMZM2G127101	AGGCCCTGTTCCAATCTCGCGAGA	NA	GRMZM2G127101_T01	2133	0	-0.559	NA	NA	9	151906028	151911611	-	NA	NA	NA	Ubiquilin-1%3B Uncharacterized protein	AT2G17190.1////ubiquitin family protein	LOC_Os03g03920.1////Ubiquitin family domain containing protein, expressed	0.00202222	no	no	no	uDRG	noCNV
GRMZM2G172014	ATTTTTGTCTGAATATGTTGTGC	NA	GRMZM2G172014_T01	268	0.5	-0.46	NA	NA	9	153777111	153781389	-	NA	NA	NA	Putative leucine-rich repeat transmembrane protein kinase family protein	AT1G12460.1////Leucine-rich repeat protein kinase family protein	LOC_Os03g03570.2////leucine-rich repeat transmembrane protein kinase, putative, expressed	1.67e-06	no	no	no	dDRG	DownCNV/PAV
GRMZM2G180251	AGATCTGGAACTTGAAAGTGAAAT	NA	GRMZM2G180251_T01	471	0	-0.755	NA	NA	10	2118792	2122726	+	NA	NA	NA	Uncharacterized protein	NA	NA	4.47e-06	no	yes	yes	others	DownCNV/PAV
GRMZM2G180251	AGACTATGCGGATCTTCAGGCAGC	NA	GRMZM2G180251_T01	515	0	-0.751	NA	NA	10	2118792	2122726	+	NA	NA	NA	Uncharacterized protein	NA	NA	4.47e-06	no	yes	yes	others	DownCNV/PAV
GRMZM2G180251	CTTCAGGCAGCACCGGCGTAGAGC	NA	GRMZM2G180251_T01	502	0	-0.727	NA	NA	10	2118792	2122726	+	NA	NA	NA	Uncharacterized protein	NA	NA	4.47e-06	no	yes	yes	others	DownCNV/PAV
GRMZM2G180251	AGAGCACTTTTCAGATCTGGAACT	NA	GRMZM2G180251_T01	483	0	-0.699	NA	NA	10	2118792	2122726	+	NA	NA	NA	Uncharacterized protein	NA	NA	4.47e-06	no	yes	yes	others	DownCNV/PAV
GRMZM2G051637	CAGCTTCGGATGCAGCTGAGTT	NA	GRMZM2G051637_T01	2972	1	-0.554	NA	NA	10	5591911	5595821	+	cr4	crinkly4	Classical Gene from J.S	Putative receptor protein kinase CRINKLY4	AT3G59420.1//ACR4,CR4//crinkly4	LOC_Os03g43670.1////TKL_IRAK_CR4L.1 - The CR4L subfamily has homology with Crinkly4, expressed	1.02e-11	no	yes	no	dDRG	noCNV
GRMZM2G439860	TGTTTGAATGCACTAGAGCTA	NA	GRMZM2G439860_T02	692	1	-0.599	NA	Gene rRNA	10	17835563	17837721	+	NA	NA	NA	Universal stress protein family protein	AT2G03720.1//MRH6//Adenine nucleotide alpha hydrolases-like superfamily protein	LOC_Os12g31710.1////universal stress protein domain containing protein, putative, expressed	0.0101929	no	no	no	dDRG	noCNV
GRMZM2G042995	CTAACCTAGTGTTACTCAGGCA	NA	GRMZM2G042995_T01	111	1	-0.675	NA	NA	10	37346572	37348590	-	NA	NA	NA	Uncharacterized protein	NA	NA	1.22e-05	no	no	no	uDRG	noCNV
GRMZM2G042995	CCAAGTCGACCCCAAGCGCGGG	NA	GRMZM2G042995_T01	222	0.5	-0.6	NA	NA	10	37346572	37348590	-	NA	NA	NA	Uncharacterized protein	NA	NA	1.22e-05	no	no	no	uDRG	noCNV
GRMZM2G027750	GCGCGGACGGTCCGCGACCAGGGA	NA	GRMZM2G027750_T01	29	1	-0.588	NA	NA	10	72991838	72998734	-	NA	NA	NA	Uncharacterized protein	AT1G26830.1//ATCUL3,ATCUL3A,CUL3,CUL3A//cullin 3	LOC_Os08g07400.1////cullin, putative, expressed	0.0230329	no	no	no	uDRG	noCNV
GRMZM2G126545	CCCTAGGGGATCCACGGGGGAGGA	NA	GRMZM2G126545_T01	210	1	-0.545	NA	NA	10	105058169	105069085	-	mbd113	methyl binding domain113	0	Uncharacterized protein	AT5G52230.1//MBD13//methyl-CPG-binding domain protein 13	LOC_Os04g19684.1////methyl-CpG binding domain containing protein, expressed	0.0190983	no	no	no	uDRG	noCNV
GRMZM2G355773	ACCCGTCGGGTACGGATATGGTGG	NA	GRMZM2G355773_T01	501	0	-0.454	NA	NA	10	116391903	116394321	+	NA	NA	NA	Histone H3.2	AT1G09200.1////Histone superfamily protein	LOC_Os04g34240.1////histone H3, putative, expressed	0.00472293	no	yes	no	dDRG	noCNV
GRMZM2G125233	AGTACACAGAAGCTCTATAGTGGC	NA	GRMZM2G125233_T02	13	1	-0.512	NA	NA	10	122246130	122248808	+	umc146	0	0	Uncharacterized protein	AT3G47800.1////Galactose mutarotase-like superfamily protein	LOC_Os04g38540.1////aldose 1-epimerase, putative, expressed	0.0188282	no	no	no	dDRG	DownCNV/PAV
GRMZM2G058573	TTGTTGGGTTTCAACTCTAGCC	ZmOrphan242	GRMZM2G058573_T07	611	0.5	-0.589	NA	NA	10	125923937	125946058	-	NA	NA	NA	Uncharacterized protein	AT5G55760.1//SRT1//sirtuin 1	LOC_Os04g20270.1////transcriptional regulator Sir2 family protein, putative, expressed	0.000540713	no	no	no	uDRG	noCNV
GRMZM2G125452	GATTGGTGGGTCGGAACGATTCCT	NA	GRMZM2G125452_T03	673	0.5	-0.522	NA	NA	10	127994955	127997721	-	NA	NA	NA	Uncharacterized protein	AT5G15320.1////	LOC_Os04g02670.1////expressed protein	0.000333458	no	no	no	dDRG	noCNV
GRMZM2G000245	GATTCGGCCGCCATAACTGCGAGA	NA	GRMZM2G000245_T02	951	0	-0.561	NA	NA	10	128583776	128590953	-	NA	NA	NA	Uncharacterized protein	AT5G47690.3////binding	LOC_Os04g42320.1////AT hook motif family protein, expressed	0.01182	no	no	yes	uDRG	noCNV
GRMZM2G017414	AGAGCAACAGTCTAGCTGCTAACT	NA	GRMZM2G017414_T01	3234	0	-0.483	NA	NA	10	137189044	137195761	+	NA	NA	NA	Putative HLH DNA-binding domain superfamily protein%3B Uncharacterized protein	AT2G27230.1//LHW//transcription factor-related	LOC_Os02g45170.1////helix-loop-helix DNA-binding protein, putative, expressed	0.0448453	no	no	no	uDRG	noCNV
GRMZM2G004924	GAGAGAAAGAGAGGAAGGA	NA	GRMZM2G004924_T01	3026	1	-0.463	NA	NA	10	145173827	145178977	+	NA	NA	NA	Uncharacterized protein	AT3G54710.1//ATCDT1B,CDT1,CDT1B//homolog of yeast CDT1 B homolog of yeast CDT1 B	LOC_Os10g34820.1////CDT1B - Putative DNA replication initiation protein, expressed	0.0432818	no	yes	no	dDRG	noCNV

## Sheet: miRNA-DRG pairs
Table S7c. Negatively correlated miRNA-DRG pairs.
GeneID	miRNA	TF	Transcript	Target_Pos	psRNATarget Score	Correlation between miRNA and DRG	miRNA_perfect_hits	Group	chr	start	end	strand	Gene Symbol	Full Name	Source	gene_description	a.th_ortholog	rice_ortholog	interaction.padj	early DRG	middle DRG	late DRG	Regulation on drought	CNV
GRMZM5G862109	AGAATCTTGATGATGCTGCAT	ZmEREB11	GRMZM5G862109_T01	1558	0.5	-0.571	zma-MIR172c,zma-MIR172b,zma-MIR172d,zma-MIR172a	Gene miRNA	1	292966682	292970925	+	ts6	tasselseed6	Classical Gene from J.S	Indeterminate spikelet 1	AT2G28550.3//RAP2.7,TOE1//related to AP2.7	LOC_Os03g60430.2////AP2 domain containing protein, expressed	0.255016	no	no	no	others	noCNV
GRMZM2G057369	ATTGGAGGGGATTGAGGAGGCT	NA	GRMZM2G057369_T01	339	1	-0.509	NA	Gene miRNA	6	163209693	163214633	+	umc2323	putative histone chaperone ASF1A	NA	Anti-silencing protein 1%3B Uncharacterized protein	AT5G38110.1//ASF1B,SGA01,SGA1//anti- silencing function 1b	LOC_Os05g48030.1////anti-silencing protein, ASF1-like domain containing protein, expressed	0.00769436	no	no	no	DownOnDS	noCNV
GRMZM2G165488	CAGCCAAGGATGACTTGCCGG	ZmCA2P10	GRMZM2G165488_T03	1357	1.5	-0.56	zma-MIR169r,zma-MIR169c	Gene miRNA	5	16480475	16484858	+	ca2p10	CCAAT-HAP2-transcription factor 210	assigned by the Grassius project, (Yilmaz et al 2009)	Uncharacterized protein	AT5G06510.1//NF-YA10//nuclear factor Y, subunit A10	LOC_Os03g44540.1////nuclear transcription factor Y subunit, putative, expressed	0.380433	no	no	no	others	DownCNV/PAV
GRMZM2G461808	CCCATCTGGGCTGGGACACGCAGC	NA	GRMZM2G461808_T02	1250	0.5	-0.546	NA	Gene miRNA	4	220014009	220027025	-	NA	NA	NA	Uncharacterized protein	AT1G28410.1////	LOC_Os02g20270.1////expressed protein	0.219416	no	no	no	others	noCNV
GRMZM2G170843	CGCCTTGCACCAAGTGAAT	NA	GRMZM2G170843_T02	421	1	-0.526	zma-MIR168a	Gene miRNA	9	126274883	126281328	+	NA	NA	NA	Ubiquilin-1%3B Uncharacterized protein	AT2G17200.1//DSK2//ubiquitin family protein	LOC_Os10g39620.1////ubiquitin family protein, putative, expressed	0.395174	no	no	no	others	noCNV
GRMZM2G076896	CGGGCTCGCTTGGTGCAGATC	ZmEREB111	GRMZM2G076896_T01	1074	1	-0.508	zma-MIR168b,zma-MIR168a	Gene miRNA	4	215636055	215638692	+	ereb111	AP2-EREBP-transcription factor 111	assigned by the Grassius project, (Yilmaz et al 2009)	Putative AP2/EREBP transcription factor superfamily protein	AT5G61890.1////Integrase-type DNA-binding superfamily protein	LOC_Os04g32620.1////ethylene-responsive transcription factor ERF114, putative, expressed	0.0389891	no	no	no	UpOnDS	noCNV
GRMZM2G033612	TCCACAGGCTTTCTTGAACTG	ZmOrphan160	GRMZM2G033612_T02	633	0	-0.646	zma-MIR396d,zma-MIR396c	Gene miRNA	5	13818620	13821440	-	NA	NA	NA	Uncharacterized protein	AT3G13960.1//AtGRF5,GRF5//growth-regulating factor 5	LOC_Os03g47140.1////growth regulating factor protein, putative, expressed	0.106092	no	no	no	others	noCNV
GRMZM2G034876	TCCACAGGCTTTCTTGAACTG	ZmGRF6	GRMZM2G034876_T03	662	0	-0.473	zma-MIR396d,zma-MIR396c	Gene miRNA	5	200344613	200348143	-	grftf6	GRF-transcription factor 6	assigned by the Grassius project, (Yilmaz et al 2009)	Uncharacterized protein	AT3G13960.1//AtGRF5,GRF5//growth-regulating factor 5	LOC_Os02g47280.2////growth-regulating factor, putative, expressed	0.32208	no	no	yes	others	noCNV
GRMZM2G098594	TCCACAGGCTTTCTTGAACTG	ZmGRF7	GRMZM2G098594_T03	337	0	-0.474	zma-MIR396d,zma-MIR396c	Gene miRNA	6	60352538	60355691	-	grftf7	GRF-transcription factor 7	assigned by the Grassius project, (Yilmaz et al 2009)	Uncharacterized protein	AT3G13960.1//AtGRF5,GRF5//growth-regulating factor 5	LOC_Os06g02560.1////growth-regulating factor, putative, expressed	0.0917501	no	no	yes	others	noCNV
GRMZM2G051270	TGAAGTGTTTGGGGGAACTC	NA	GRMZM2G051270_T02	145	1	-0.604	zma-MIR395p,zma-MIR395o,zma-MIR395n,zma-MIR395j,zma-MIR395i,zma-MIR395h,zma-MIR395g,zma-MIR395f,zma-MIR395e,zma-MIR395d,zma-MIR395a,zma-MIR395b	Gene miRNA	5	7710238	7714213	+	rz630f(sat)	ATP sulfurylase3	NA	Uncharacterized protein	AT3G22890.1//APS1//ATP sulfurylase 1	LOC_Os03g53230.1////bifunctional 3-phosphoadenosine 5-phosphosulfate synthetase, putative, expressed	0.00707183	no	no	no	UpOnDS	noCNV
GRMZM2G149952	TGAAGTGTTTGGGGGAACTC	NA	GRMZM2G149952_T01	453	0.5	-0.603	zma-MIR395p,zma-MIR395o,zma-MIR395n,zma-MIR395j,zma-MIR395i,zma-MIR395h,zma-MIR395g,zma-MIR395f,zma-MIR395e,zma-MIR395d,zma-MIR395a,zma-MIR395b	Gene miRNA	1	275157705	275161519	-	aps1	ATP sulfurylase1	from: EU973074	Uncharacterized protein	AT4G14680.1//APS3//Pseudouridine synthase/archaeosine transglycosylase-like family protein	LOC_Os03g53230.1////bifunctional 3-phosphoadenosine 5-phosphosulfate synthetase, putative, expressed	0.0138899	no	yes	no	UpOnDS	noCNV
GRMZM2G126018	TTGACAGAAGAGAGCGAGCAC	ZmSBP23	GRMZM2G126018_T01	978	1	-0.588	zma-MIR156k	Gene miRNA	2	190489085	190493109	-	sbp23	SBP-transcription factor 23	assigned by the Grassius project, (Yilmaz et al 2009)	Uncharacterized protein	AT2G42200.1//SPL9//squamosa promoter binding protein-like 9	LOC_Os09g31438.1////OsSPL17 - SBP-box gene family member, expressed	0.325129	no	no	no	others	noCNV
GRMZM2G160917	TTGACAGAAGAGAGCGAGCAC	ZmSBP8	GRMZM2G160917_T01	1408	1	-0.772	zma-MIR156k	Gene miRNA	1	188215376	188219483	-	ub2	unbranched2	assigned by the Grassius project, (Yilmaz et al 2009), also from AJ011618 and Chuck et al, 2014	SBP-domain protein 5	AT2G42200.1//SPL9//squamosa promoter binding protein-like 9	LOC_Os08g39890.1////OsSPL14 - SBP-box gene family member, expressed	0.118658	no	no	no	others	noCNV
GRMZM2G126018	TTGACAGAAGAGAGTGAGCAC	ZmSBP23	GRMZM2G126018_T02	896	1	-0.758	zma-MIR156b,zma-MIR156d	Gene miRNA	2	190489085	190493109	-	sbp23	SBP-transcription factor 23	assigned by the Grassius project, (Yilmaz et al 2009)	Uncharacterized protein	AT2G42200.1//SPL9//squamosa promoter binding protein-like 9	LOC_Os09g31438.1////OsSPL17 - SBP-box gene family member, expressed	0.325129	no	no	no	others	noCNV
GRMZM2G160917	TTGACAGAAGAGAGTGAGCAC	ZmSBP8	GRMZM2G160917_T03	1309	1	-0.838	zma-MIR156b,zma-MIR156d	Gene miRNA	1	188215376	188219483	-	ub2	unbranched2	assigned by the Grassius project, (Yilmaz et al 2009), also from AJ011618 and Chuck et al, 2014	SBP-domain protein 5	AT2G42200.1//SPL9//squamosa promoter binding protein-like 9	LOC_Os08g39890.1////OsSPL14 - SBP-box gene family member, expressed	0.118658	no	no	no	others	noCNV
GRMZM2G460544	TTGACAGAAGAGAGTGAGCAC	ZmSBP30	GRMZM2G460544_T01	1138	1	-0.656	zma-MIR156b,zma-MIR156d	Gene miRNA	4	199456664	199460958	-	ub3	unbranched3	assigned by the Grassius project, (Yilmaz et al 2009), from: AJ011620, and Chuck et al., 2014	Squamosa promoter-binding protein-like (SBP domain) transcription factor family protein%3B Uncharacterized protein	AT2G42200.1//SPL9//squamosa promoter binding protein-like 9	LOC_Os08g39890.1////OsSPL14 - SBP-box gene family member, expressed	0.414126	no	no	no	others	noCNV
